# Supplementary material for: I2/DMSO mediated multicomponent reaction for the synthesis of 2-arylbenzo[d]imidazo[2,1-b] thiazole derivatives
Source: Royal Society of Chemistry journal article supplement (doi:10.1039/c9ob00515c), 2019-01-01
Supplement: c9ob00515c1.pdf [file c9ob00515c1.pdf]

## Supporting information

# I<sub>2</sub>/DMSO mediated multicomponent reaction for the synthesis of 2-arylbenzo[*d*]imidazo[2,1-*b*] thiazole derivatives

Asim Jana, Prabhas Bhaumick, Anoop Kumar Panday, Richa Mishra and Lokman H. Choudhury\*

*Department of Chemistry, Indian Institute of Technology Patna, Bihta, Patna-801106*

---

### Table of contents:

1. Copies of <sup>1</sup>H and <sup>13</sup>C NMR spectra of compounds.....S2-S39
2. Crystal structure description of **6o**.....S40-S48

# Copies of $^1\text{H}$ and $^{13}\text{C}$ NMR spectra of compounds

## $^1\text{H}$ and $^{13}\text{C}$ NMR spectra of 4a

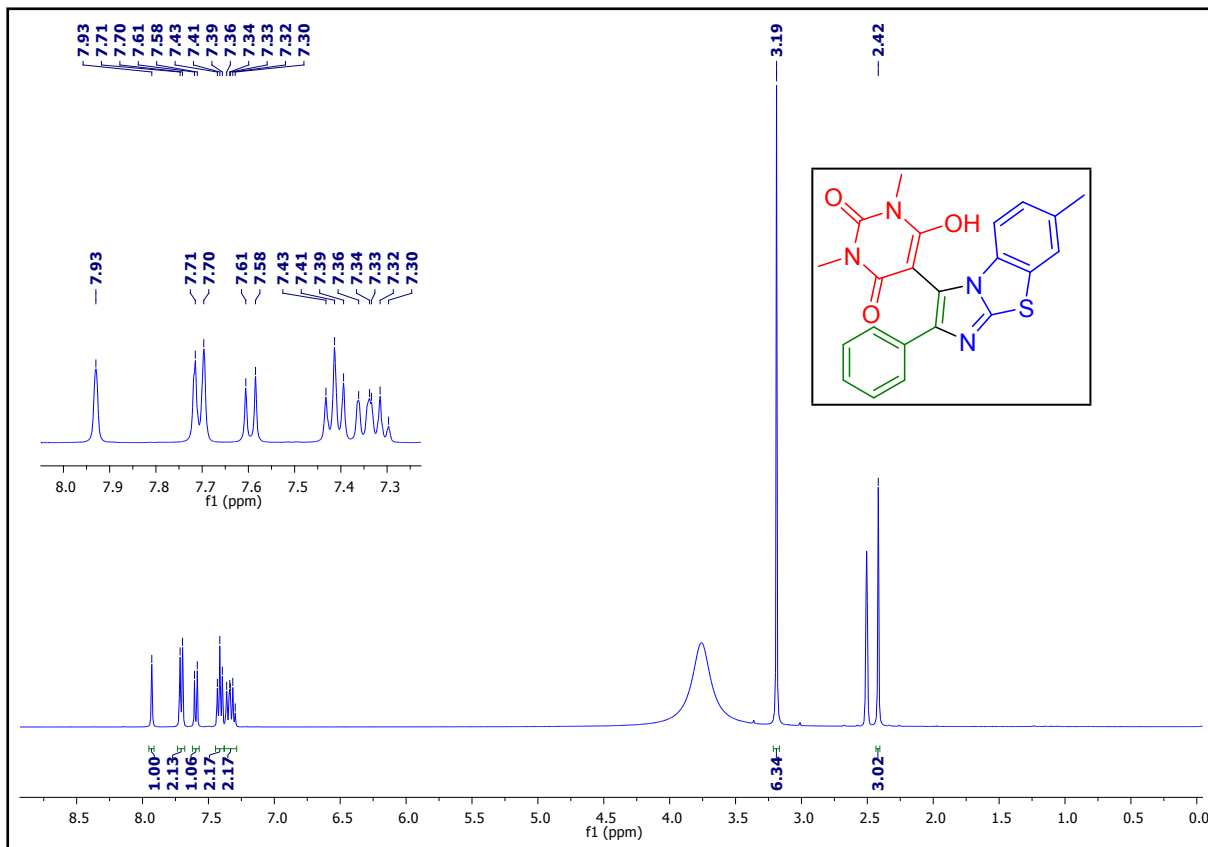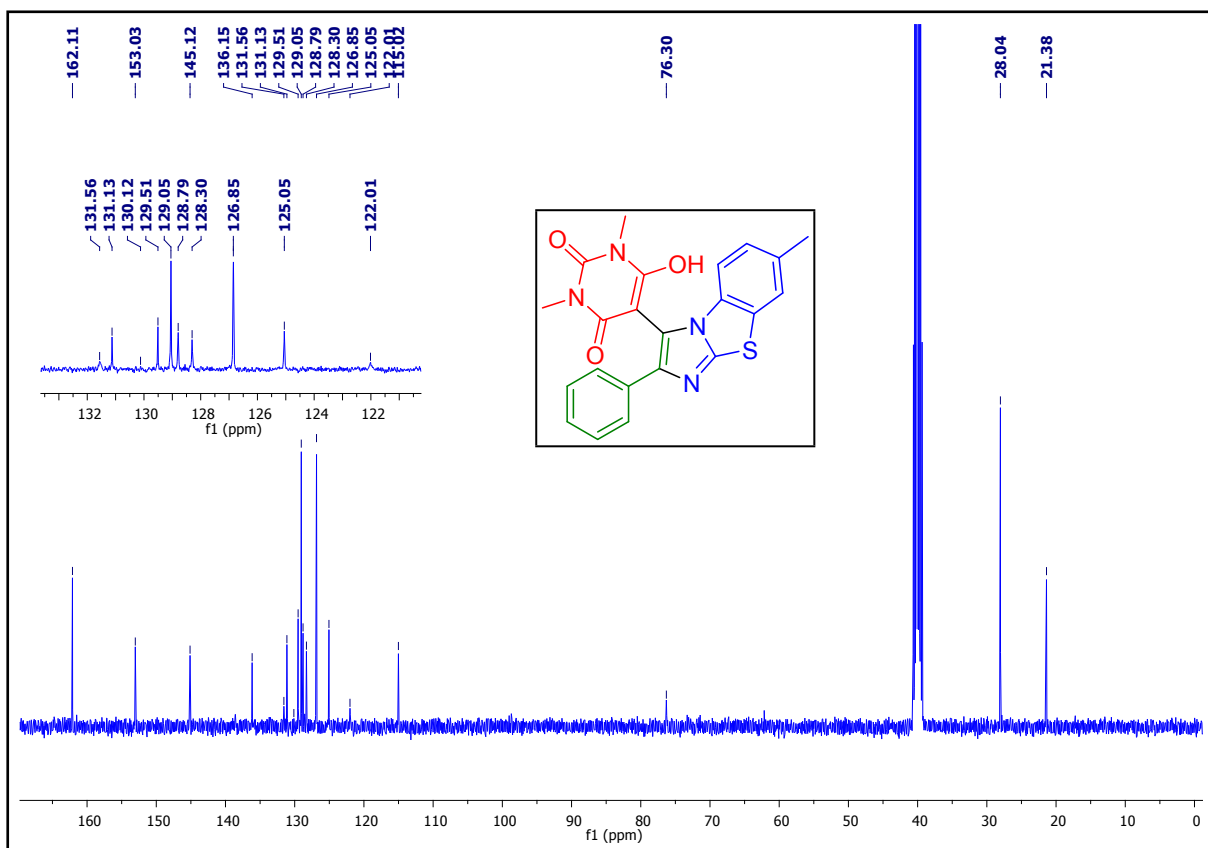

# $^1\text{H}$ and $^{13}\text{C}$ NMR spectra of 4b

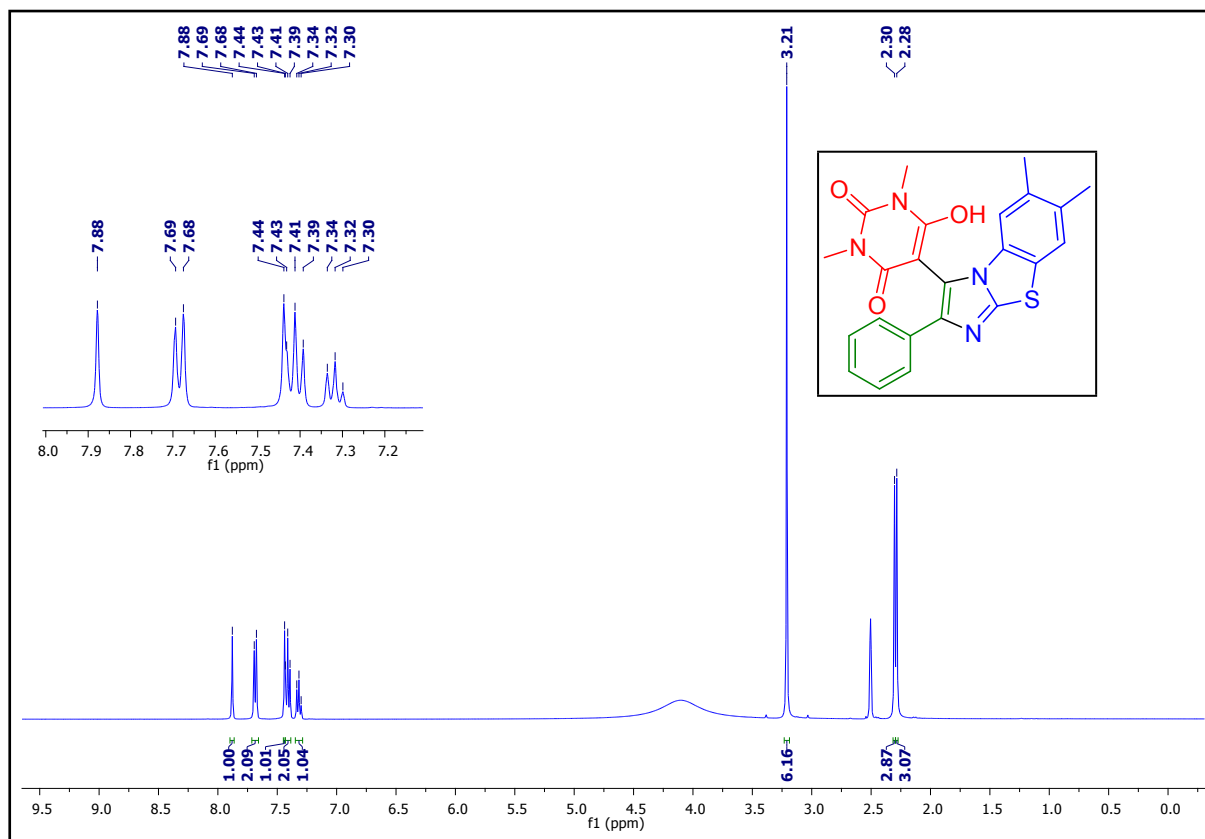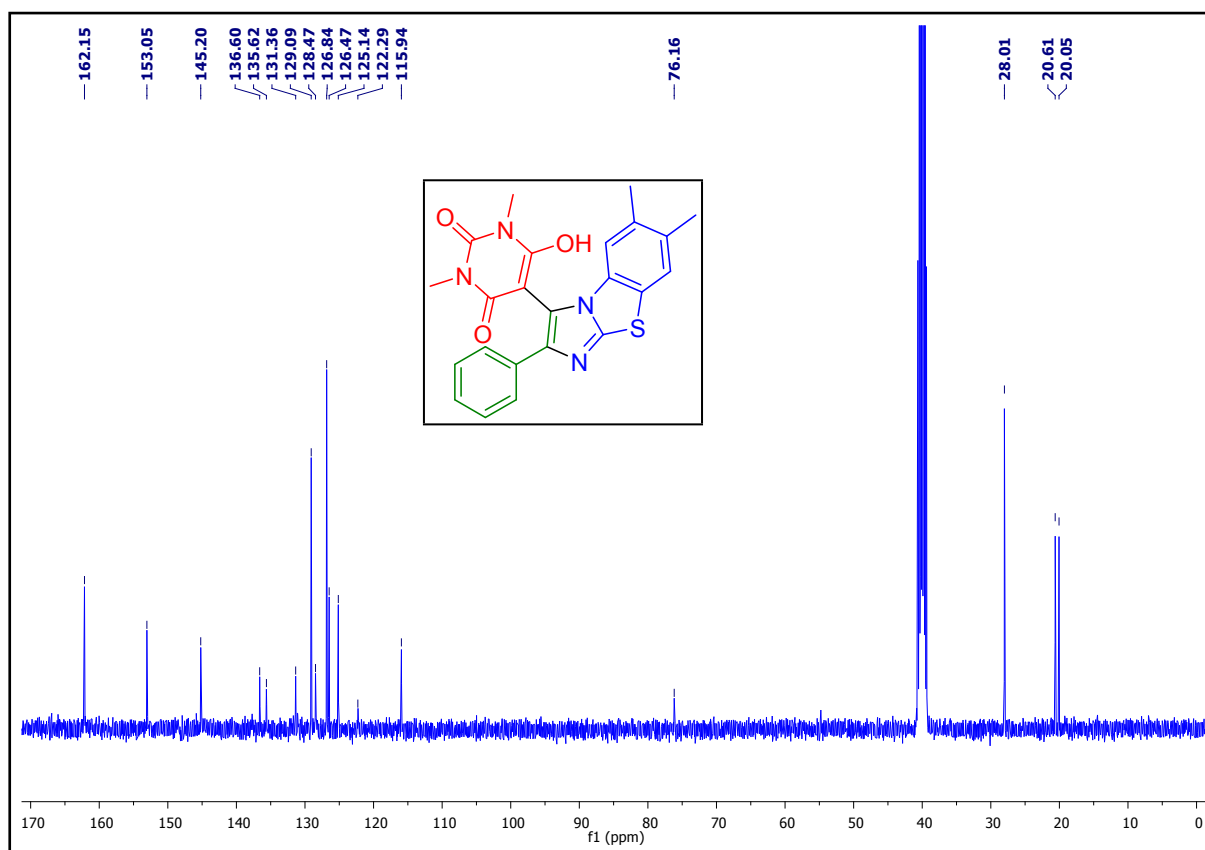

# $^1\text{H}$ and $^{13}\text{C}$ NMR spectra of 4c

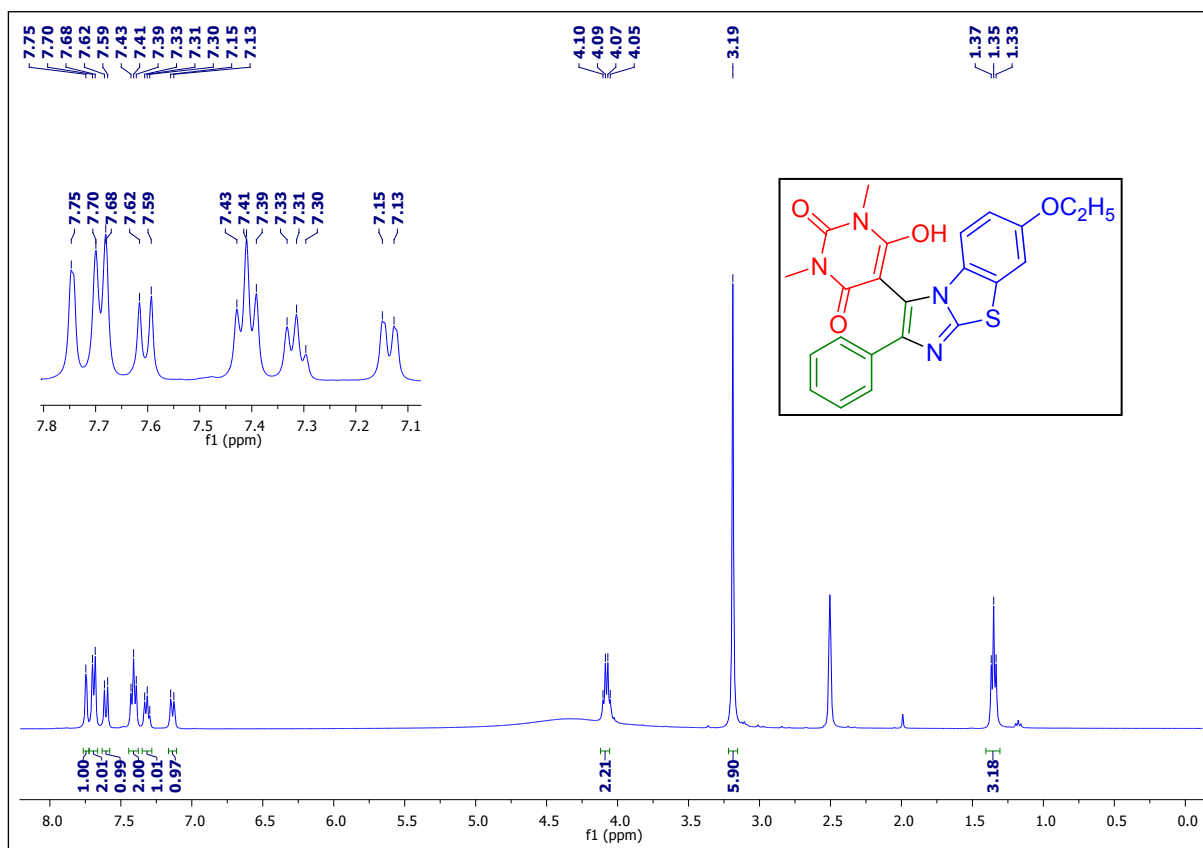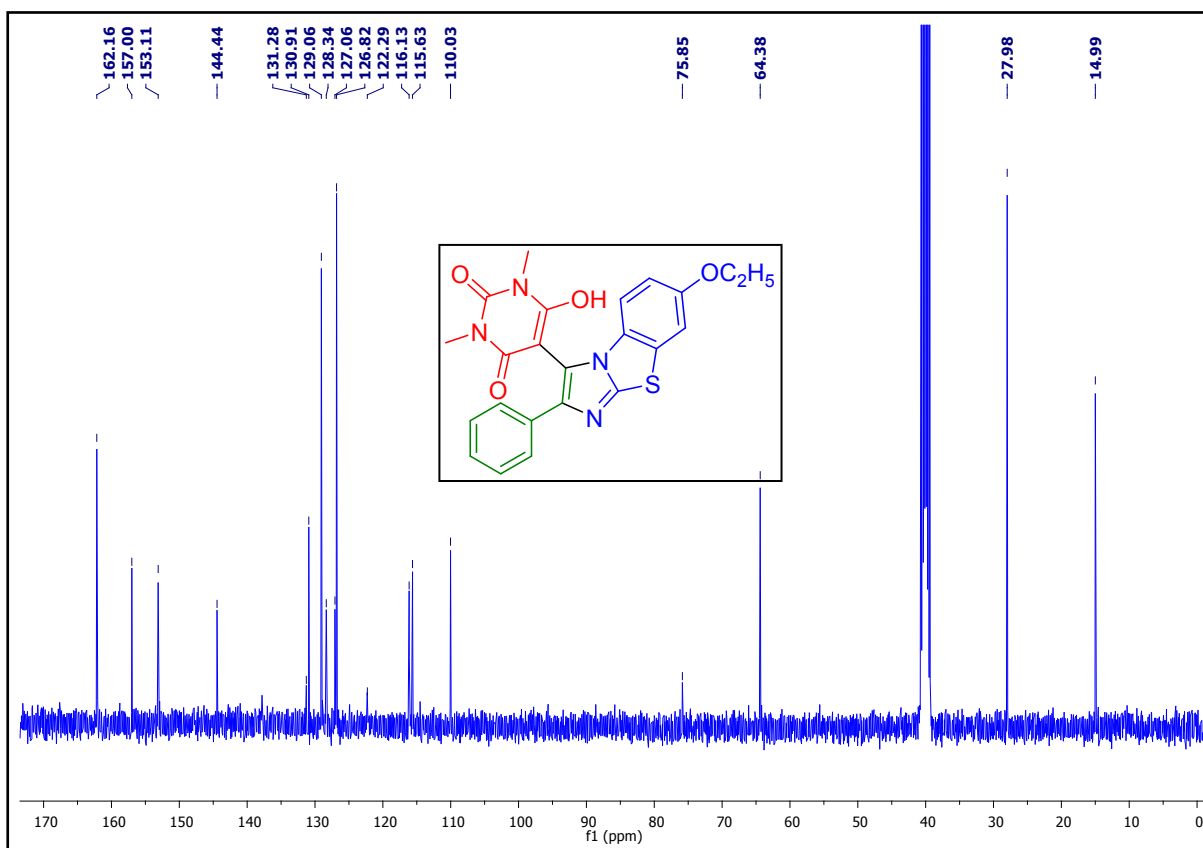

# $^1\text{H}$ and $^{13}\text{C}$ NMR spectra of 4d

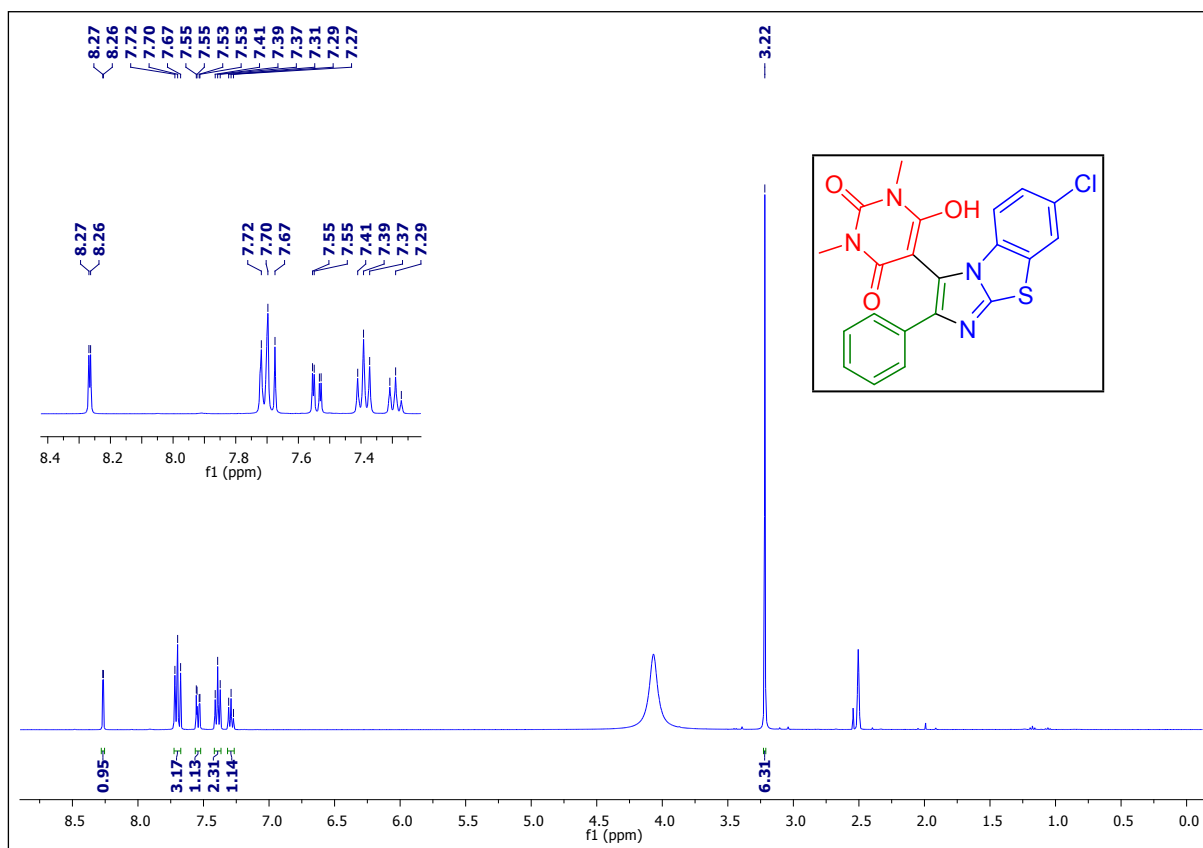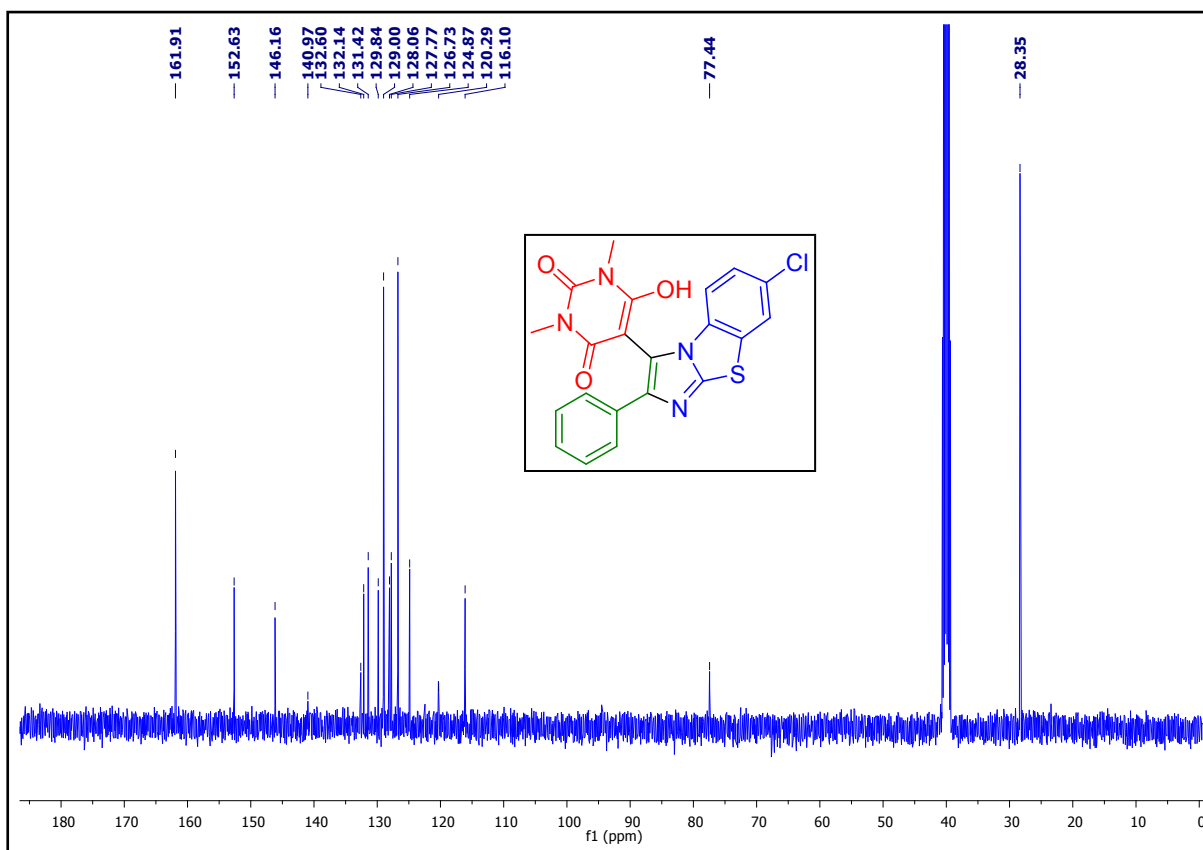

# $^1\text{H}$ and $^{13}\text{C}$ NMR spectra of 4e

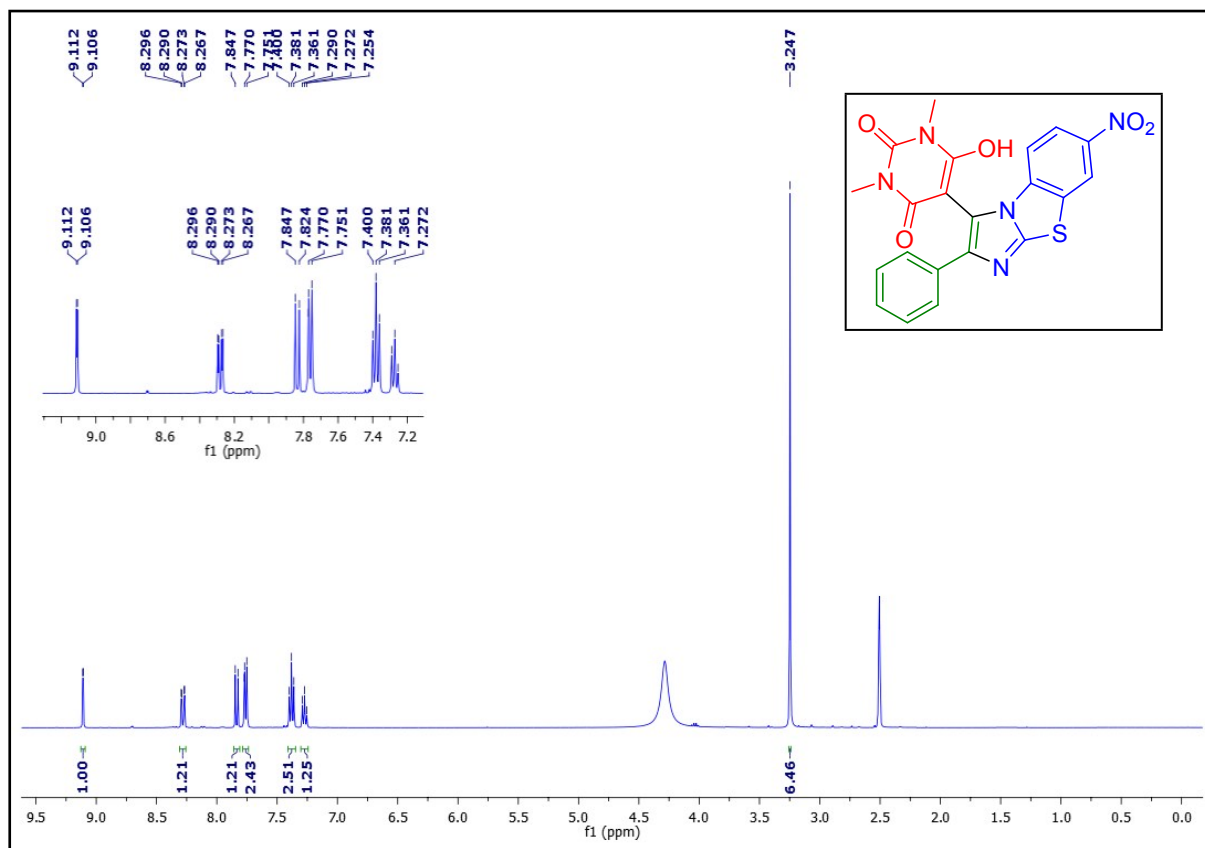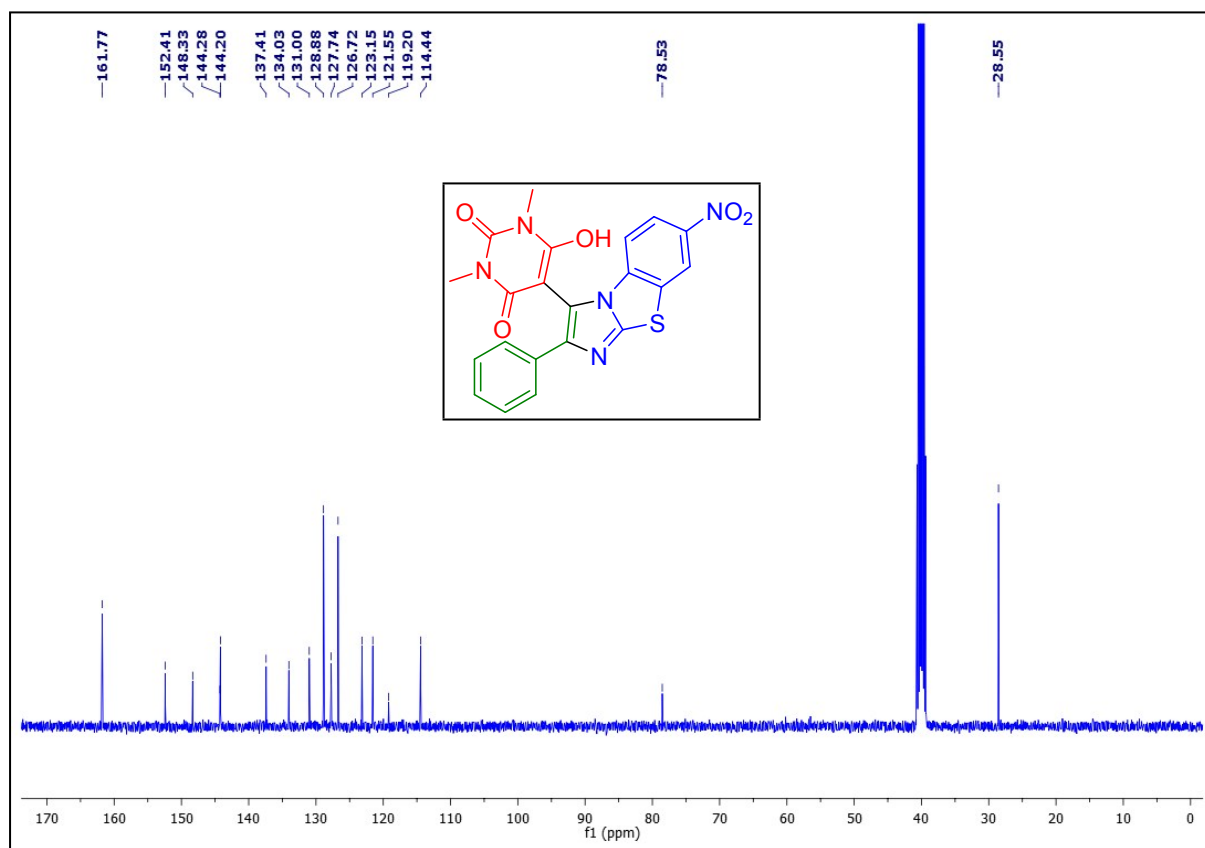

# $^1\text{H}$ and $^{13}\text{C}$ NMR spectra of 4f

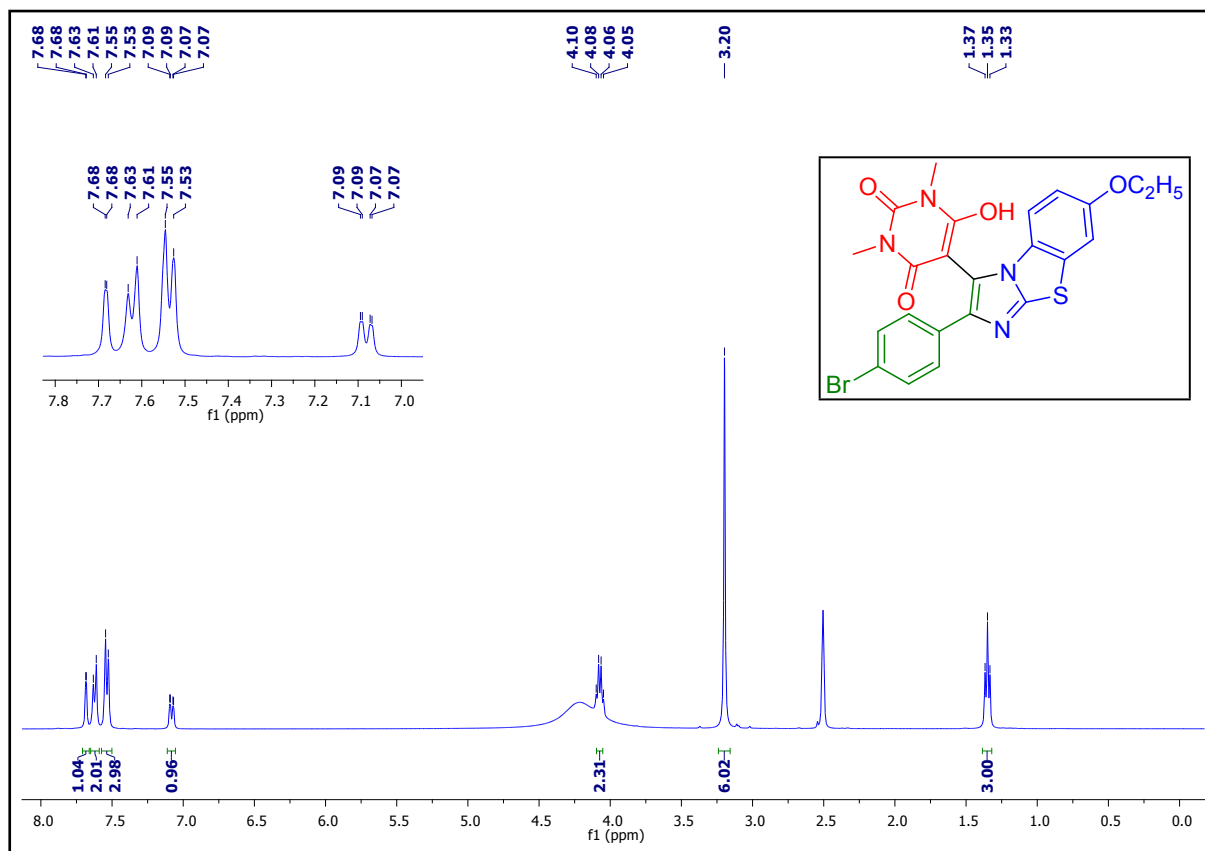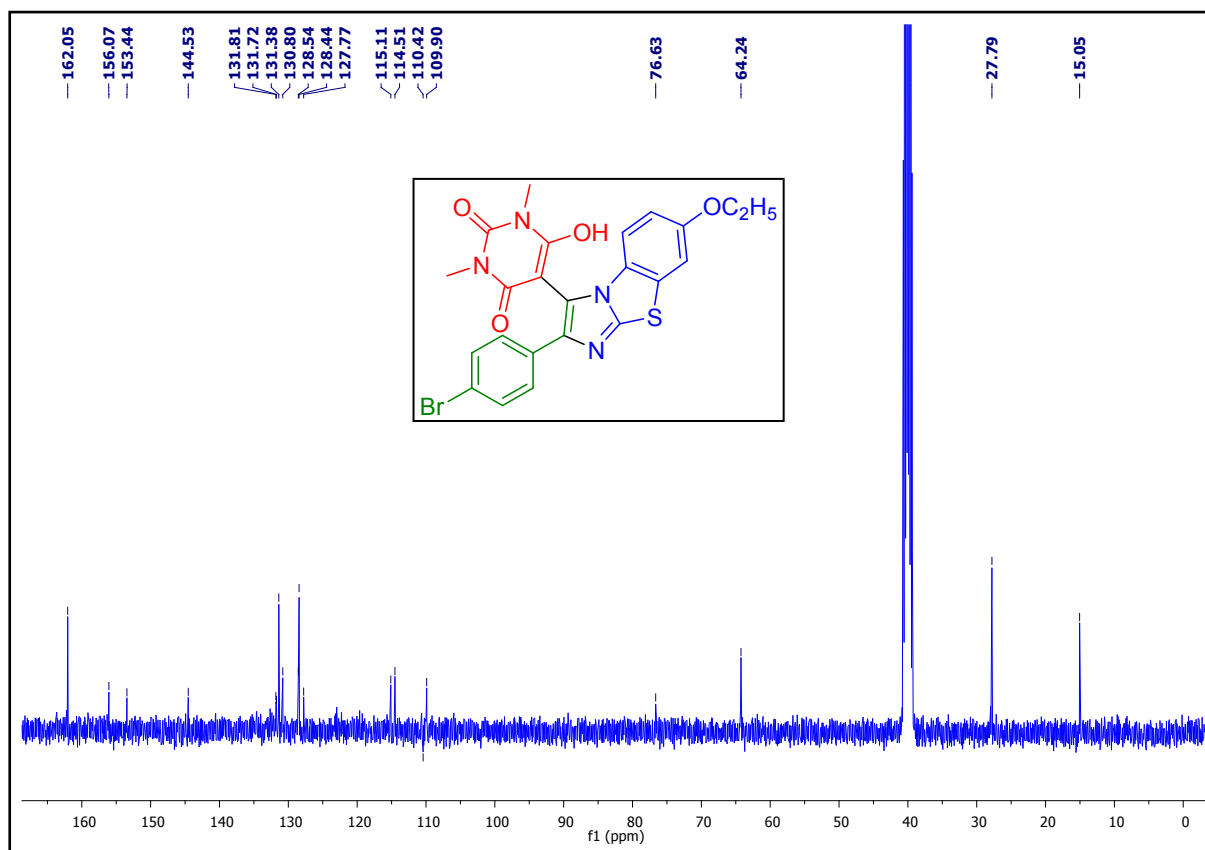

# $^1\text{H}$ and $^{13}\text{C}$ NMR spectra of 4g

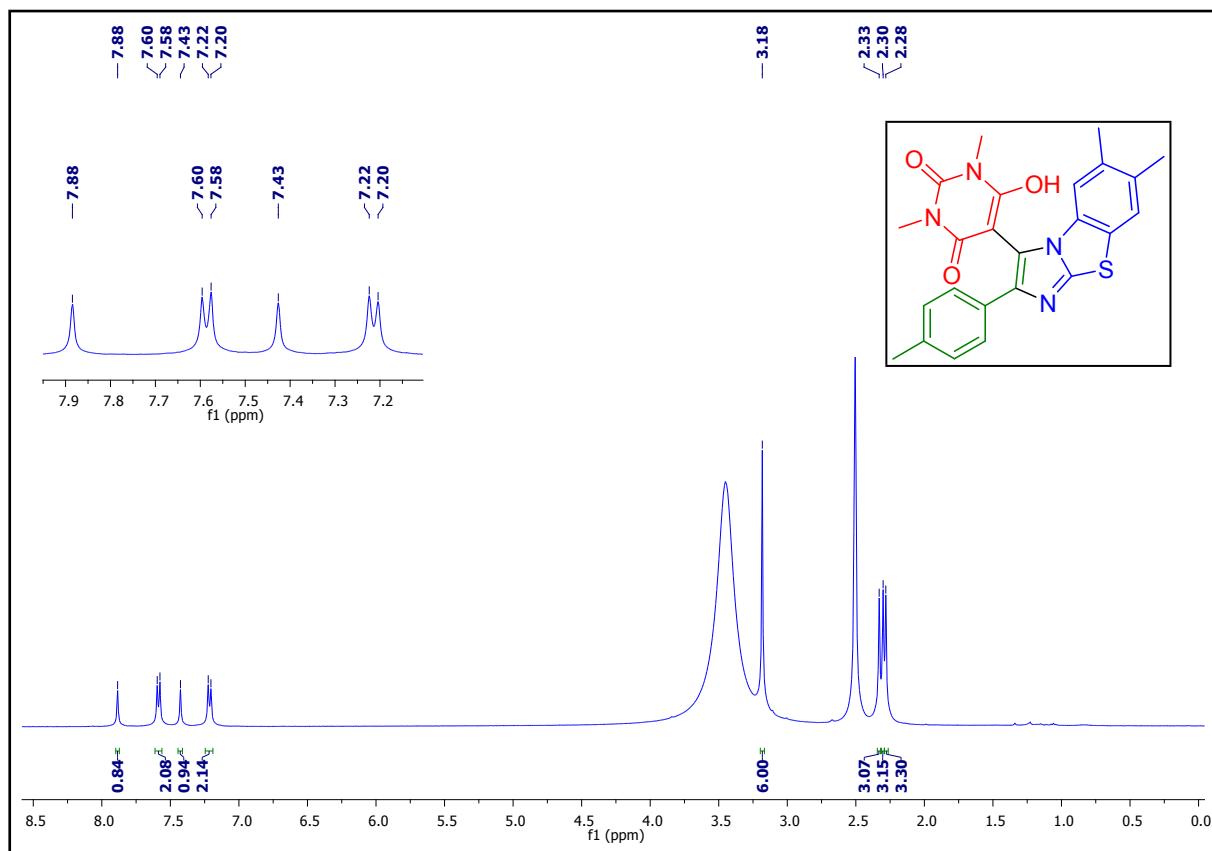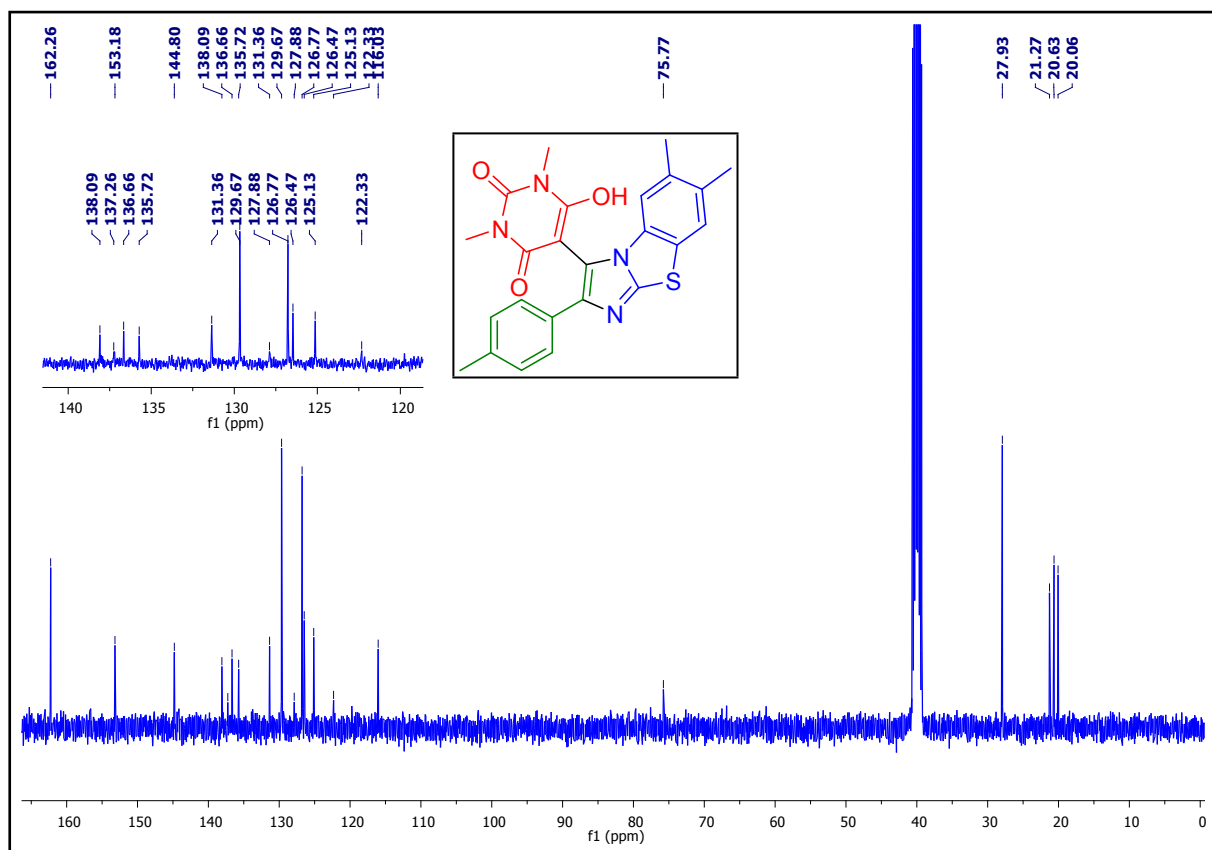



# $^1\text{H}$ and $^{13}\text{C}$ NMR spectra of 4h

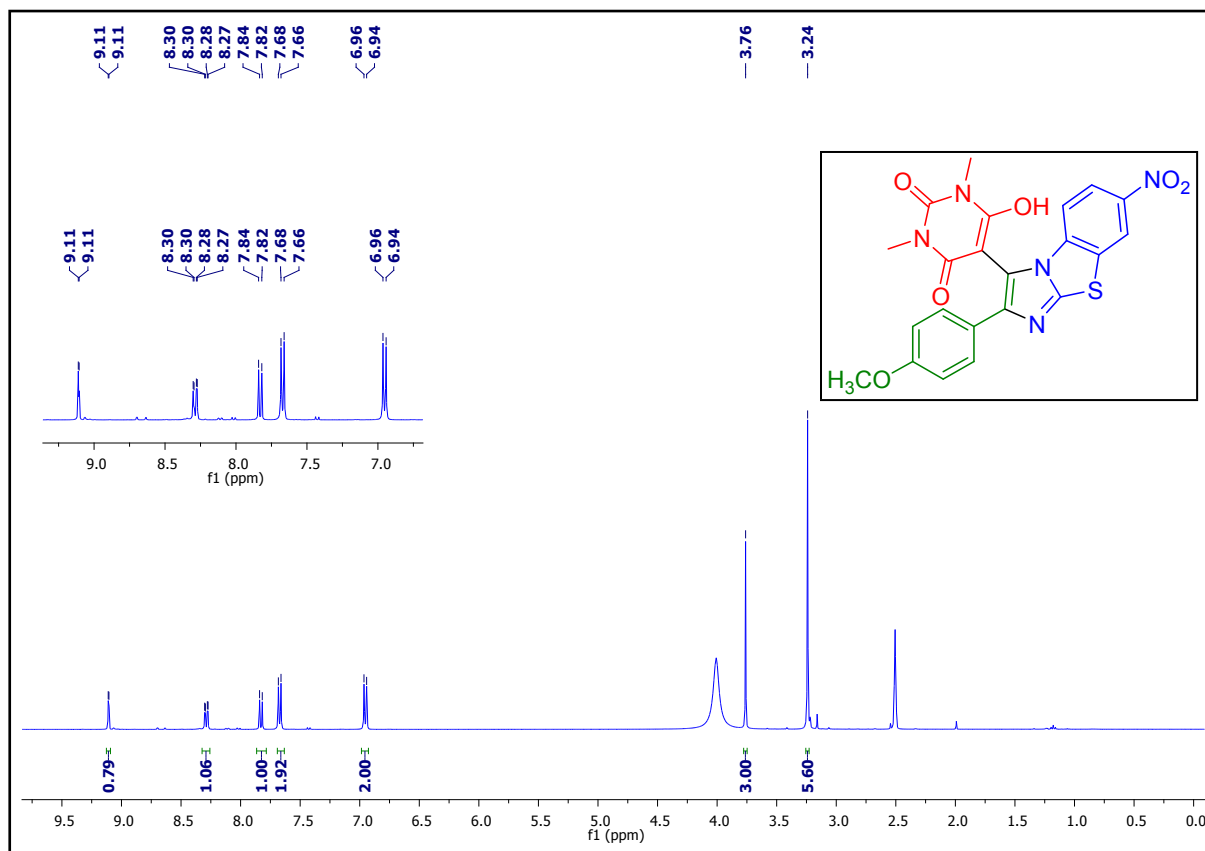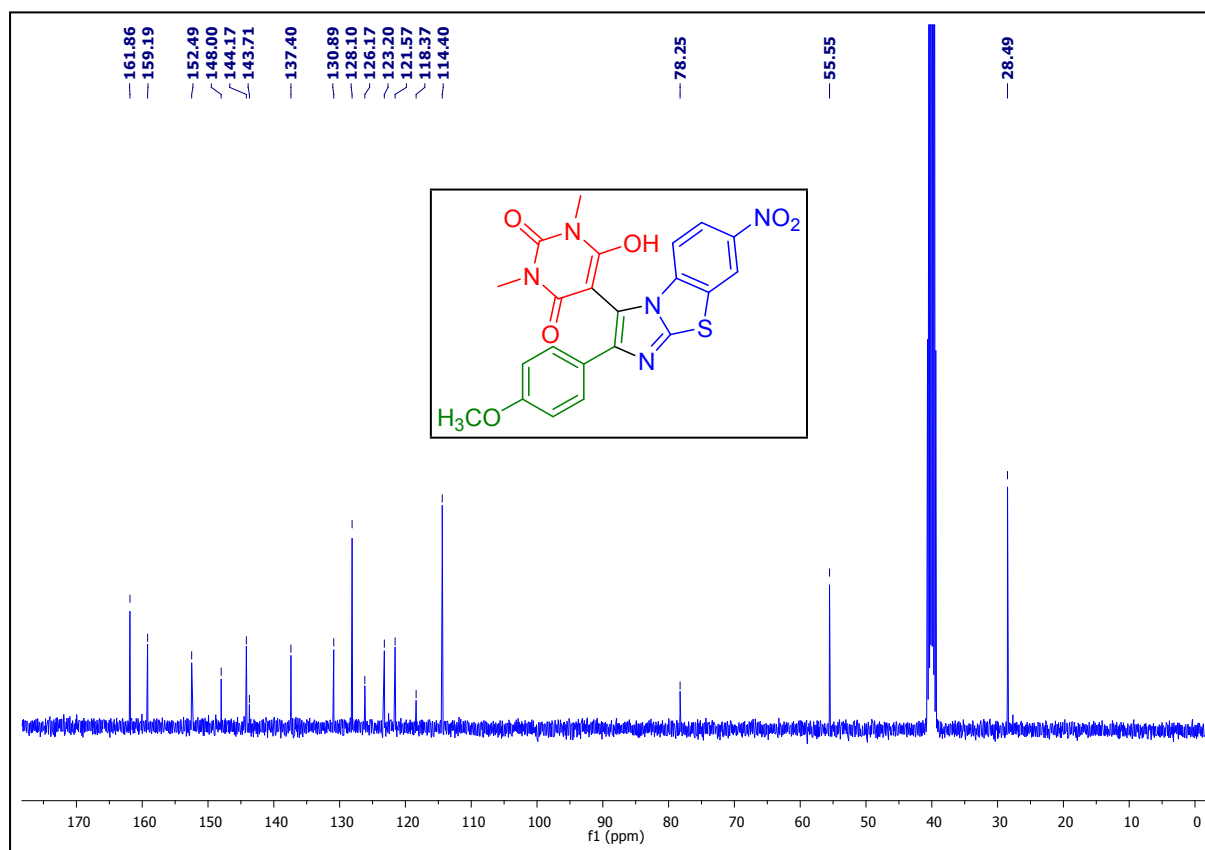

# $^1\text{H}$ and $^{13}\text{C}$ NMR spectra of 4i

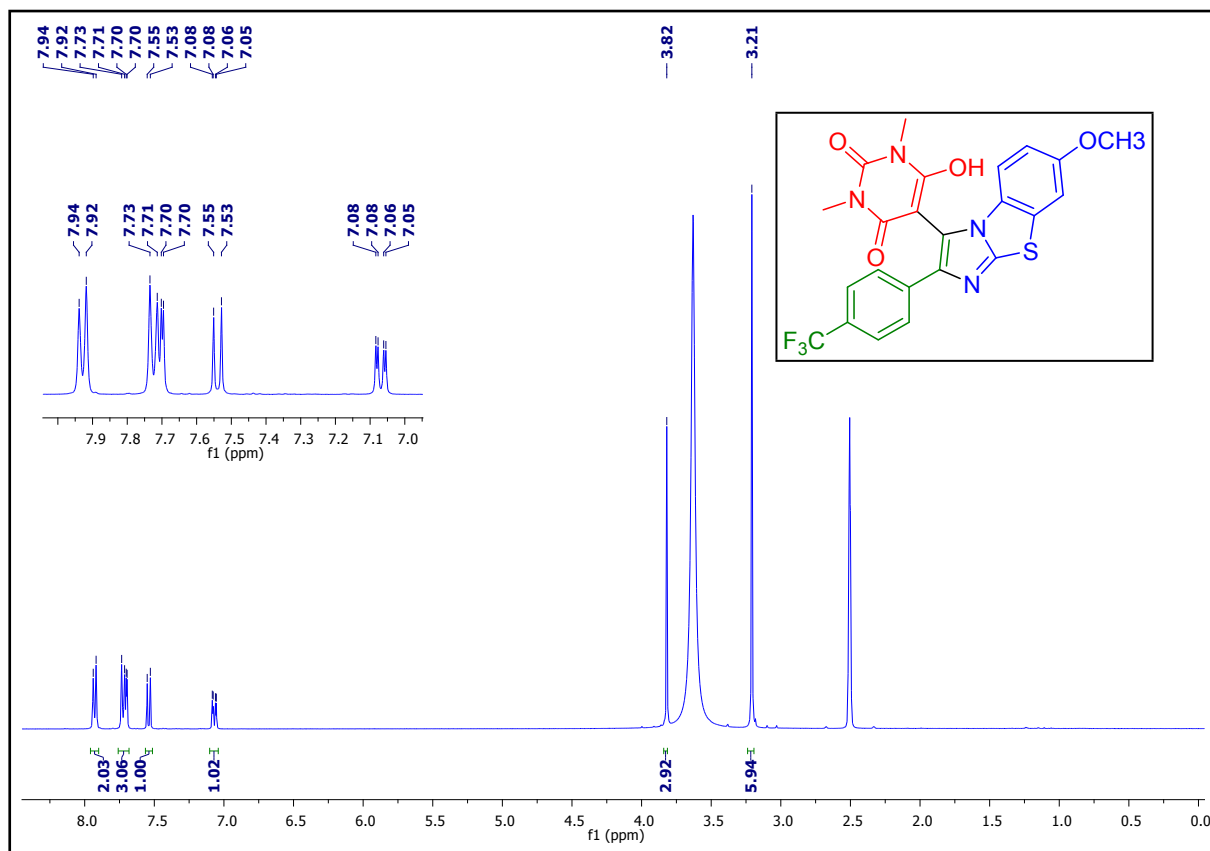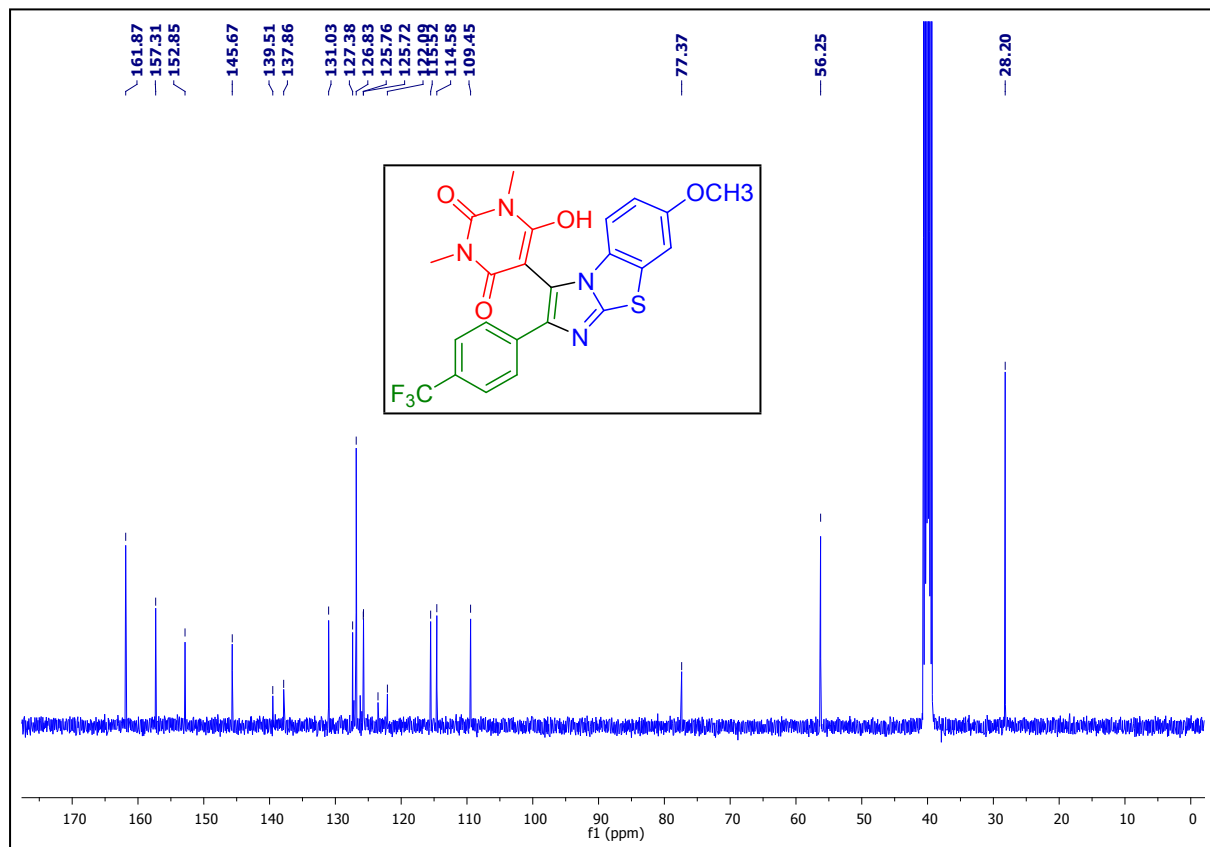

# $^1\text{H}$ and $^{13}\text{C}$ NMR spectra of 4j

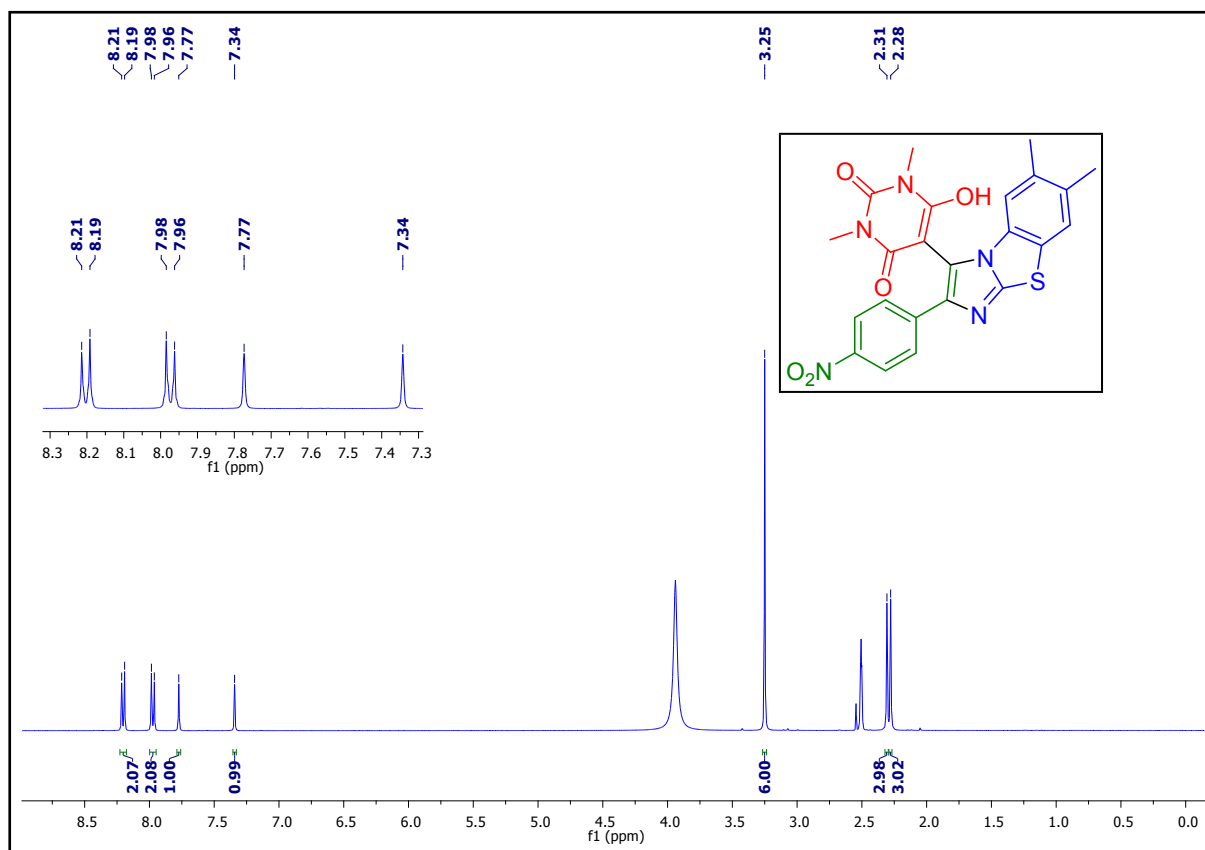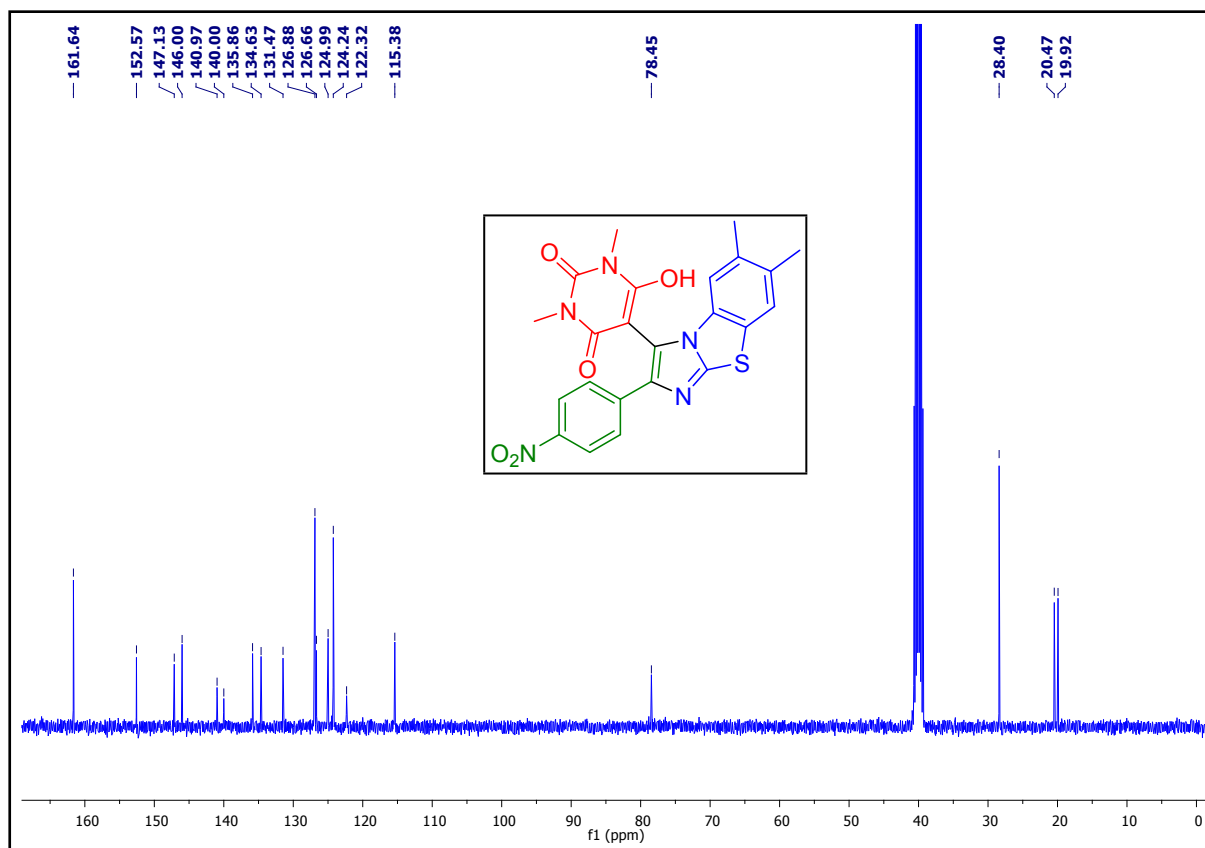

# $^1\text{H}$ and $^{13}\text{C}$ NMR spectra of 6a

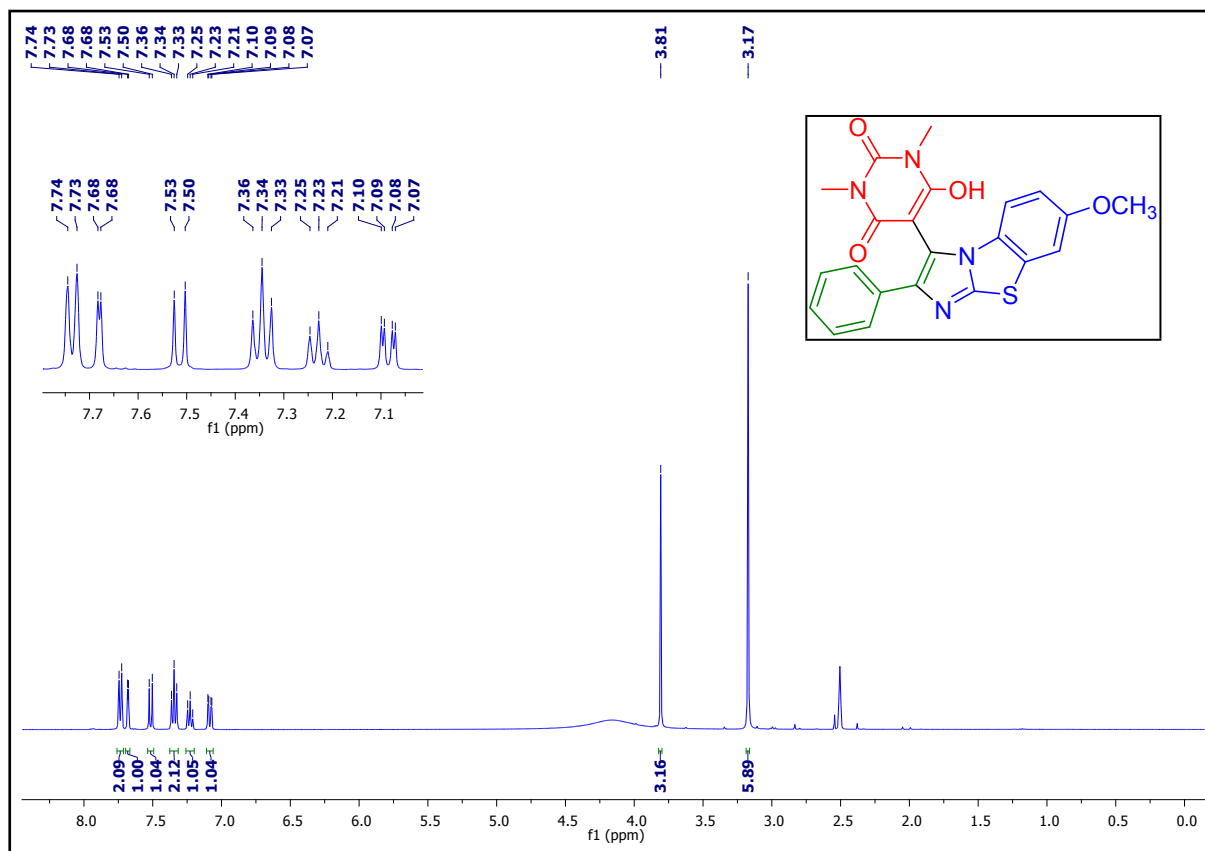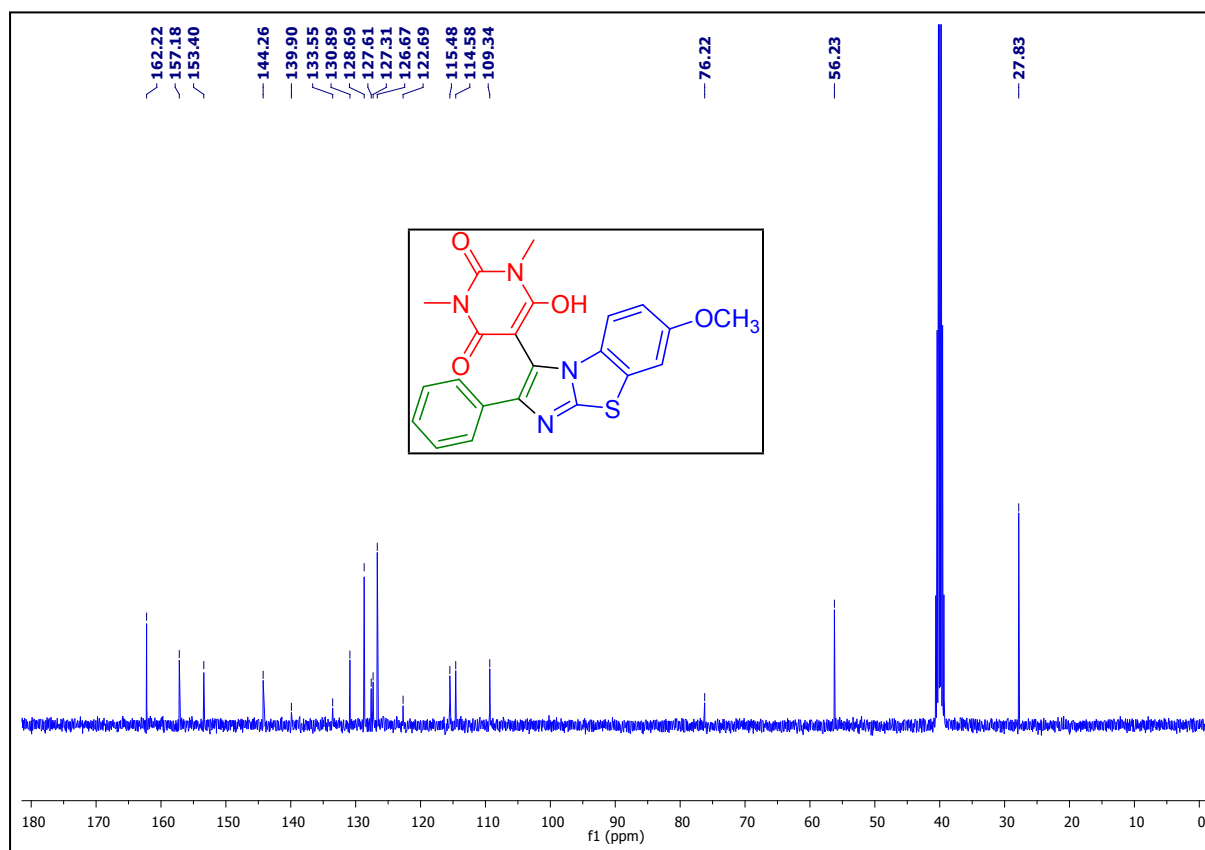

# $^1\text{H}$ and $^{13}\text{C}$ NMR spectra of 6b

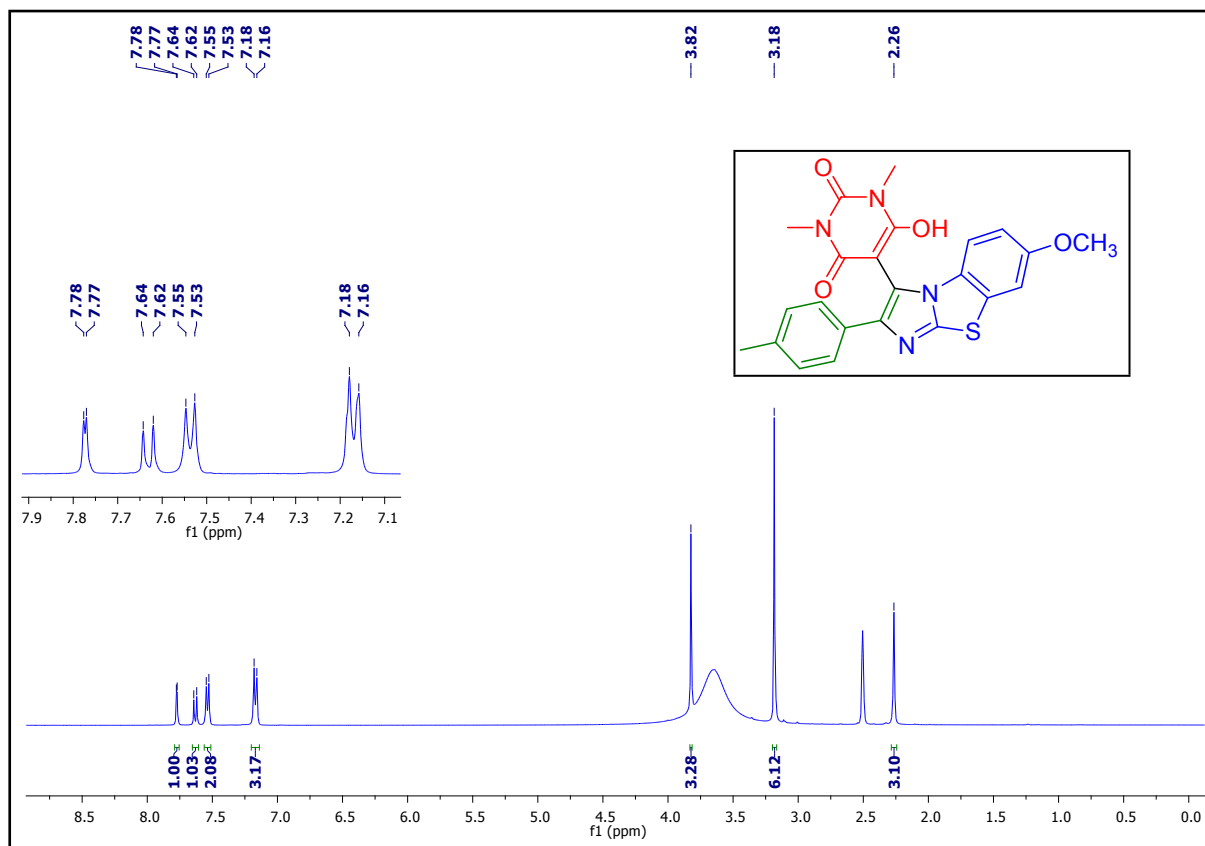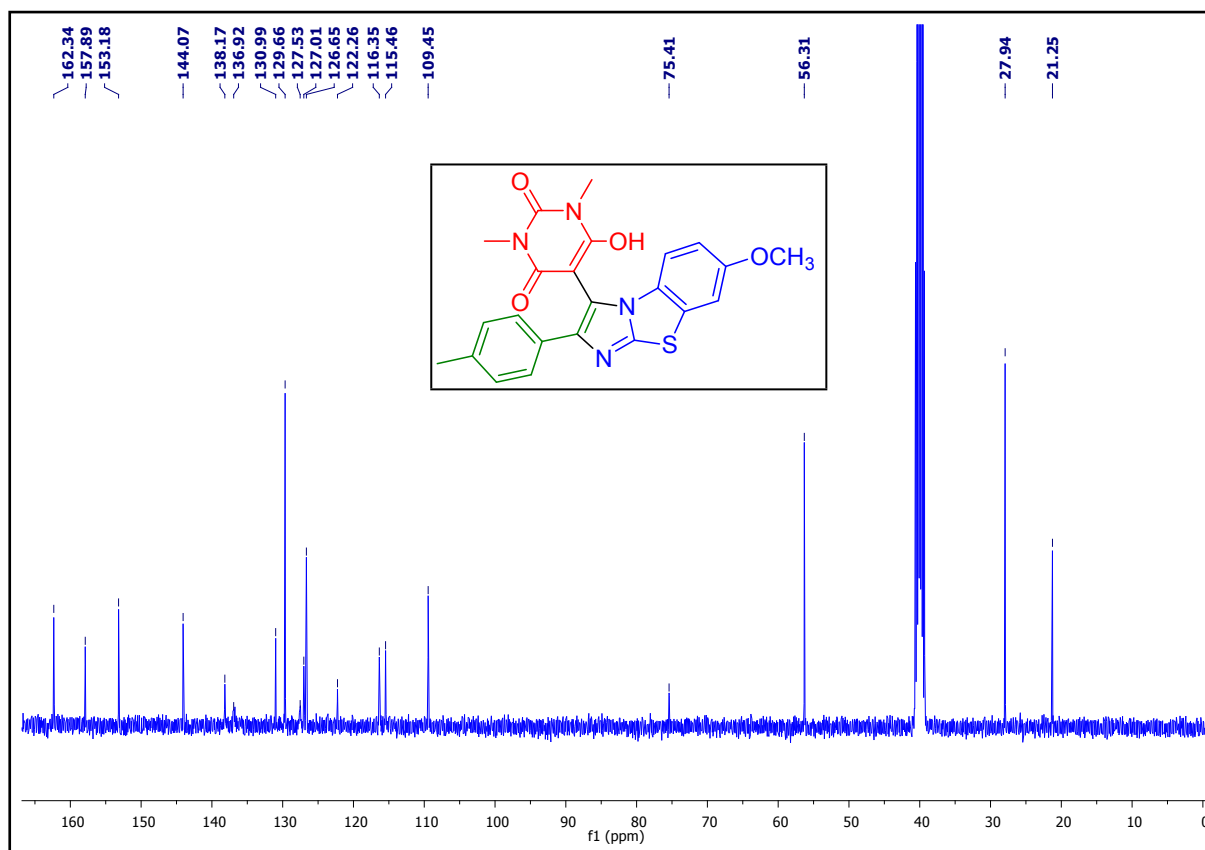

# $^1\text{H}$ and $^{13}\text{C}$ NMR spectra of 6c

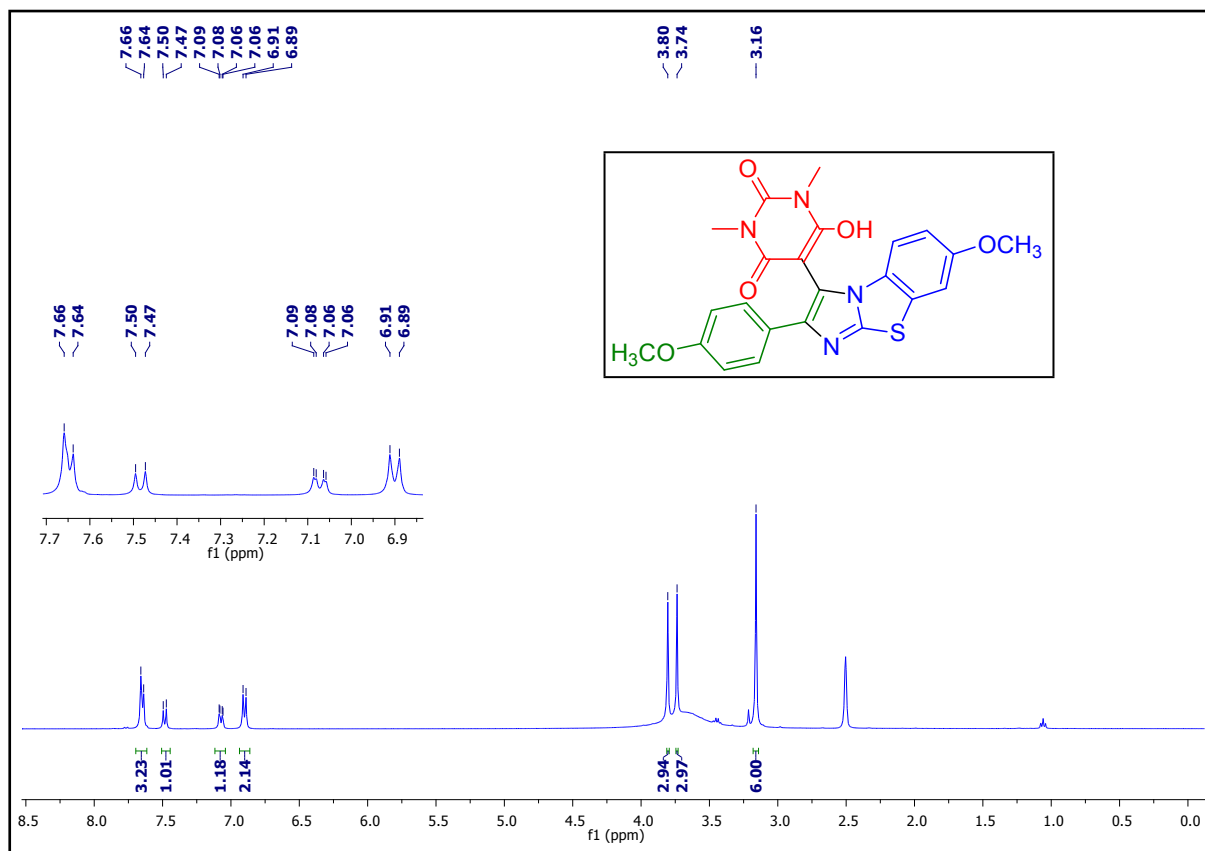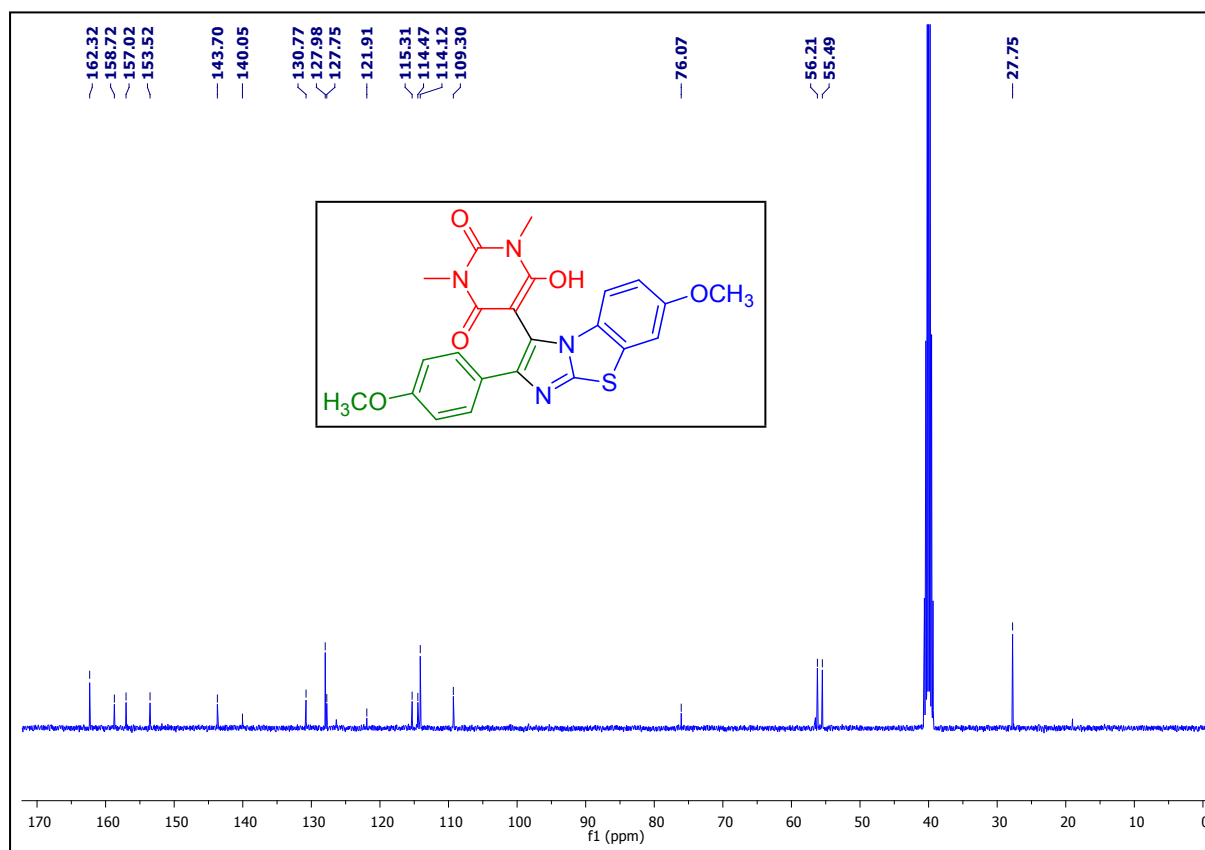

# $^1\text{H}$ and $^{13}\text{C}$ NMR spectra of 6d

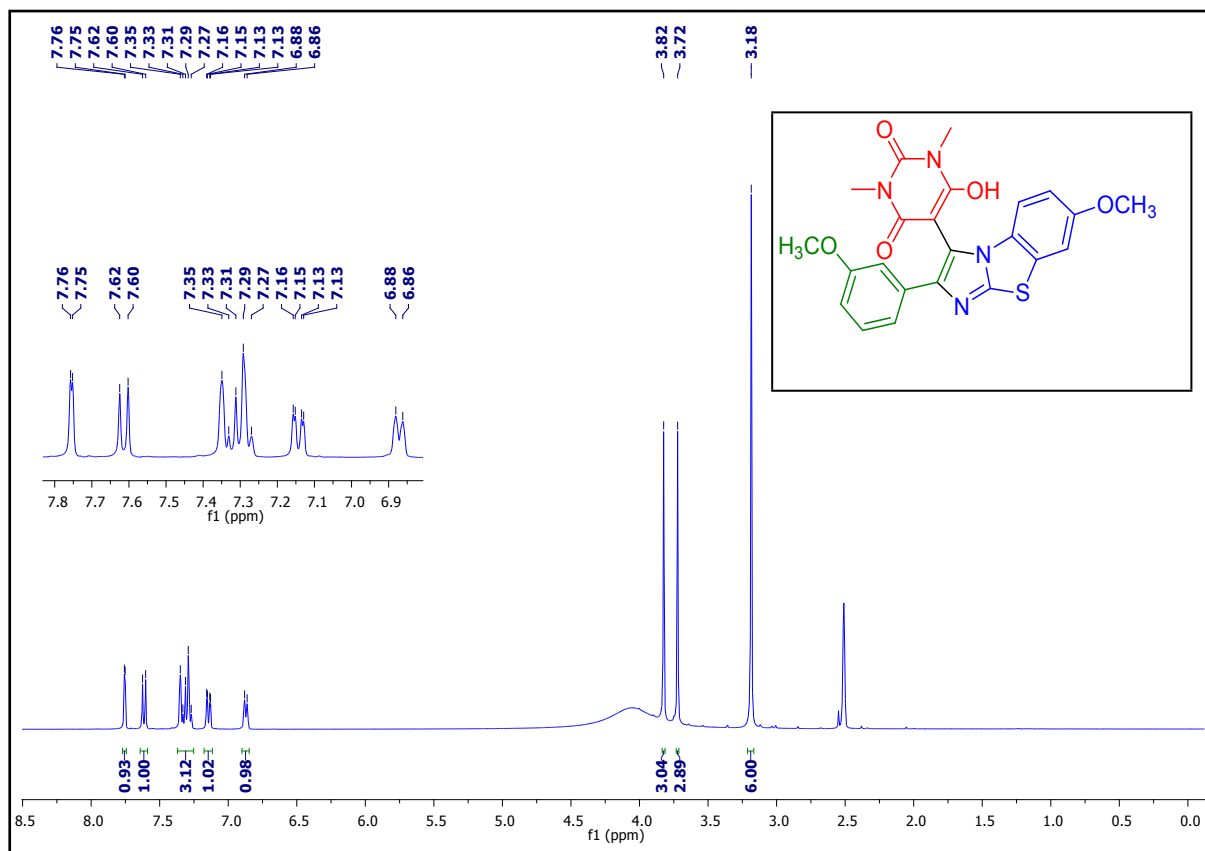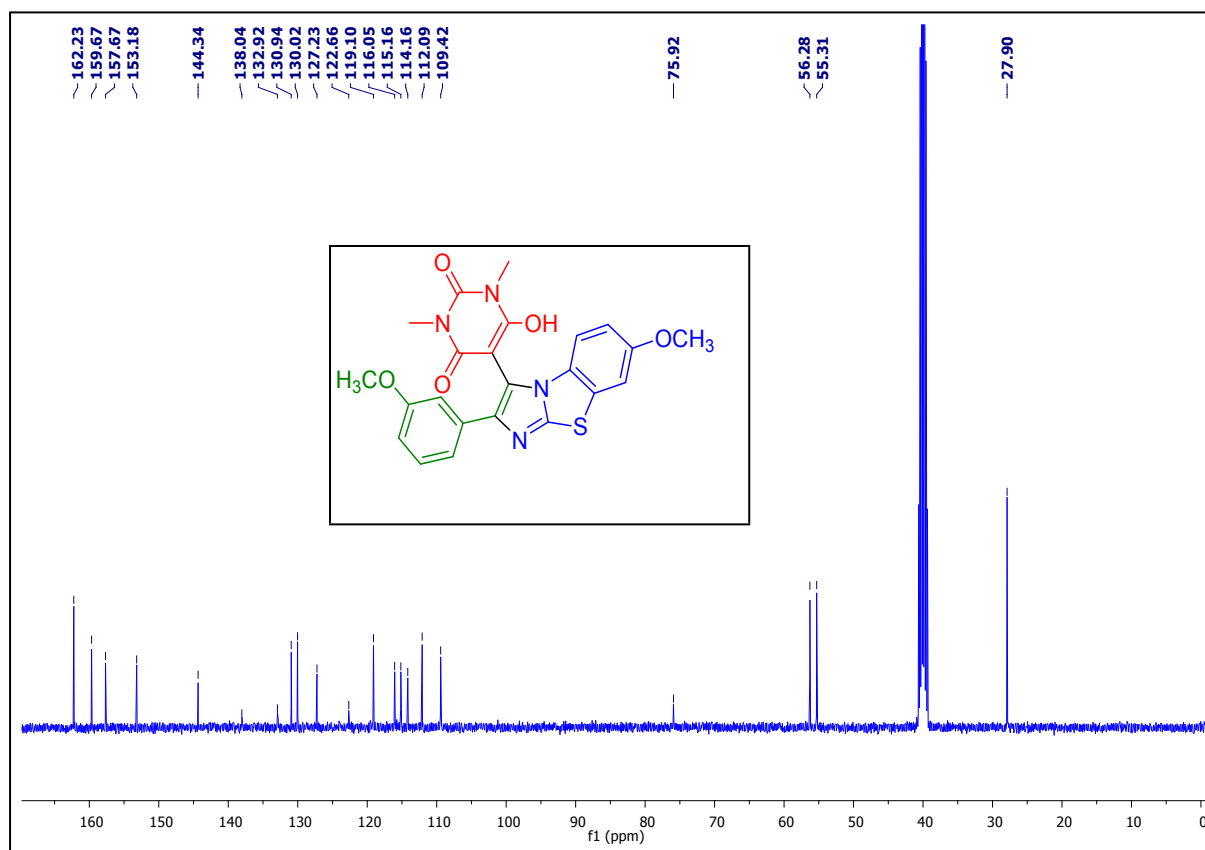

# $^1\text{H}$ and $^{13}\text{C}$ NMR spectra of 6e

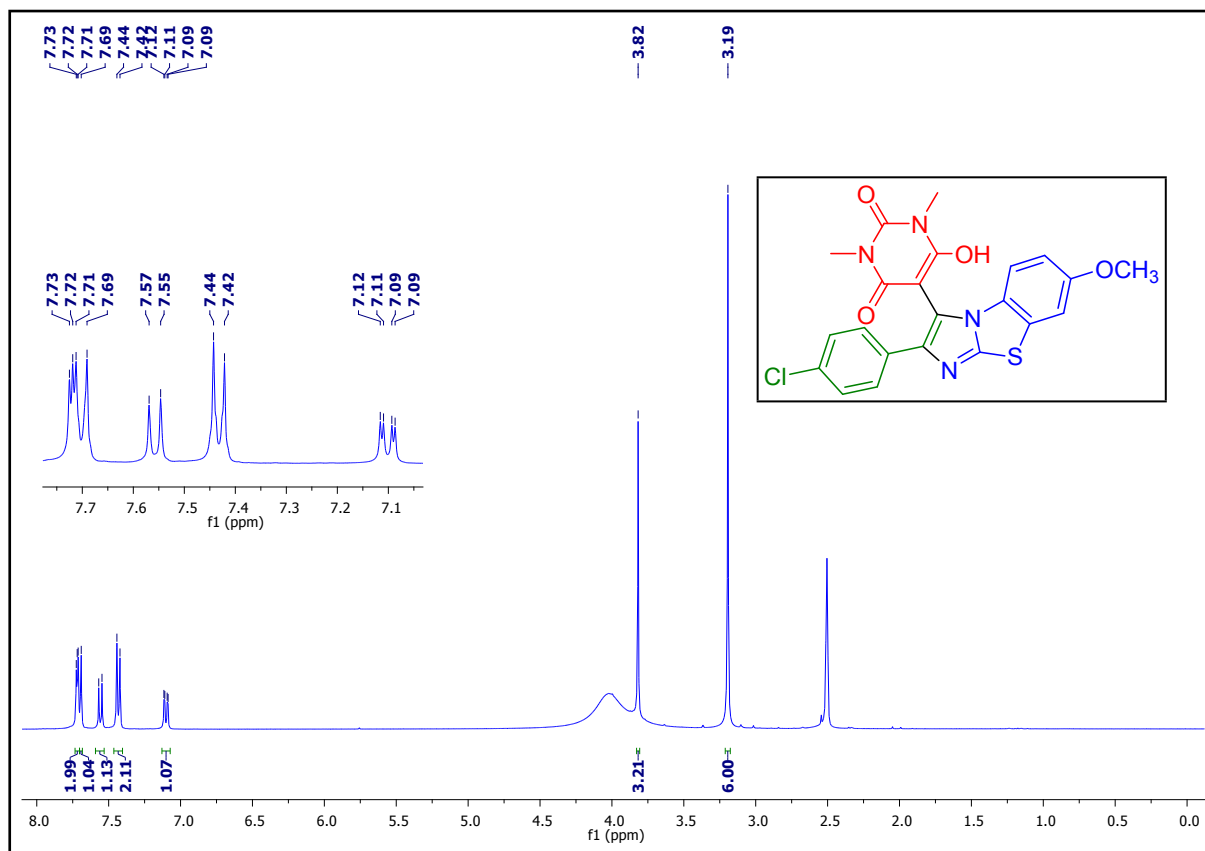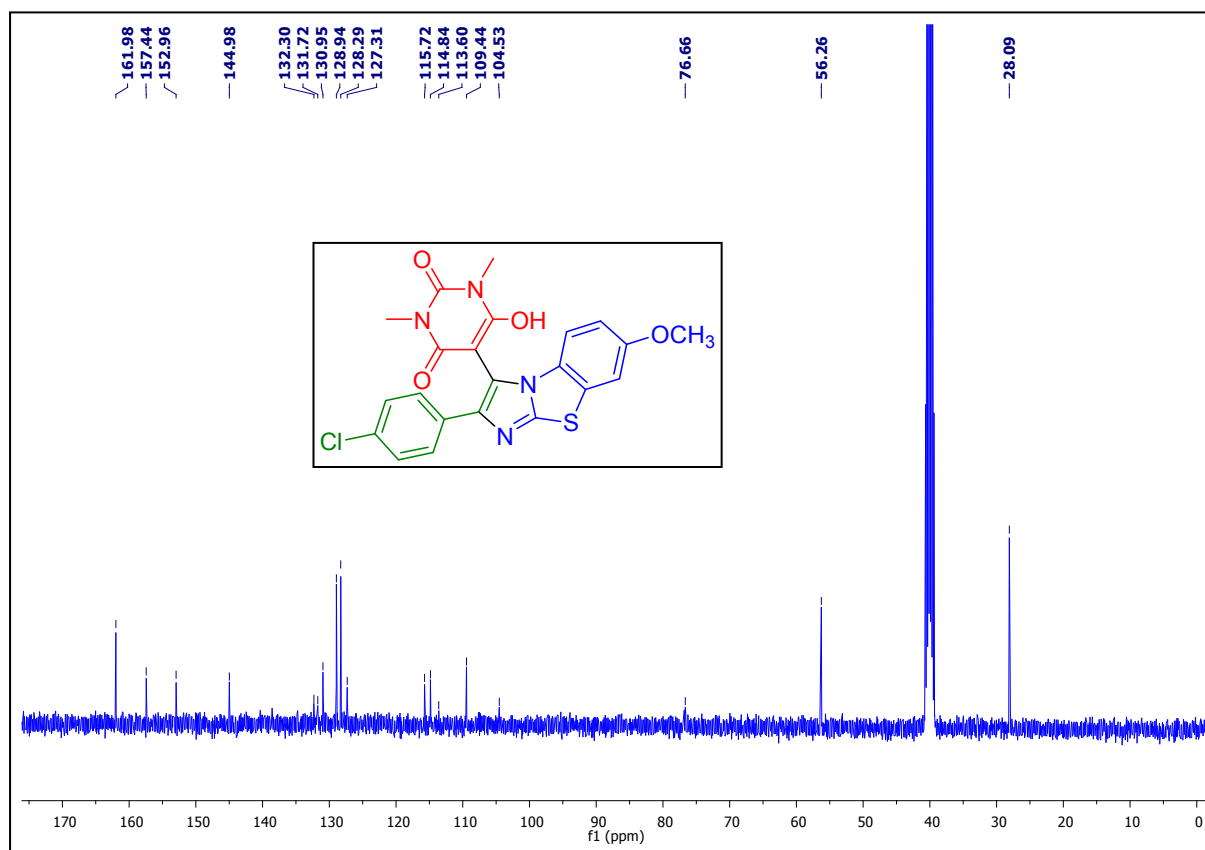



# $^1\text{H}$ and $^{13}\text{C}$ NMR spectra of 6f

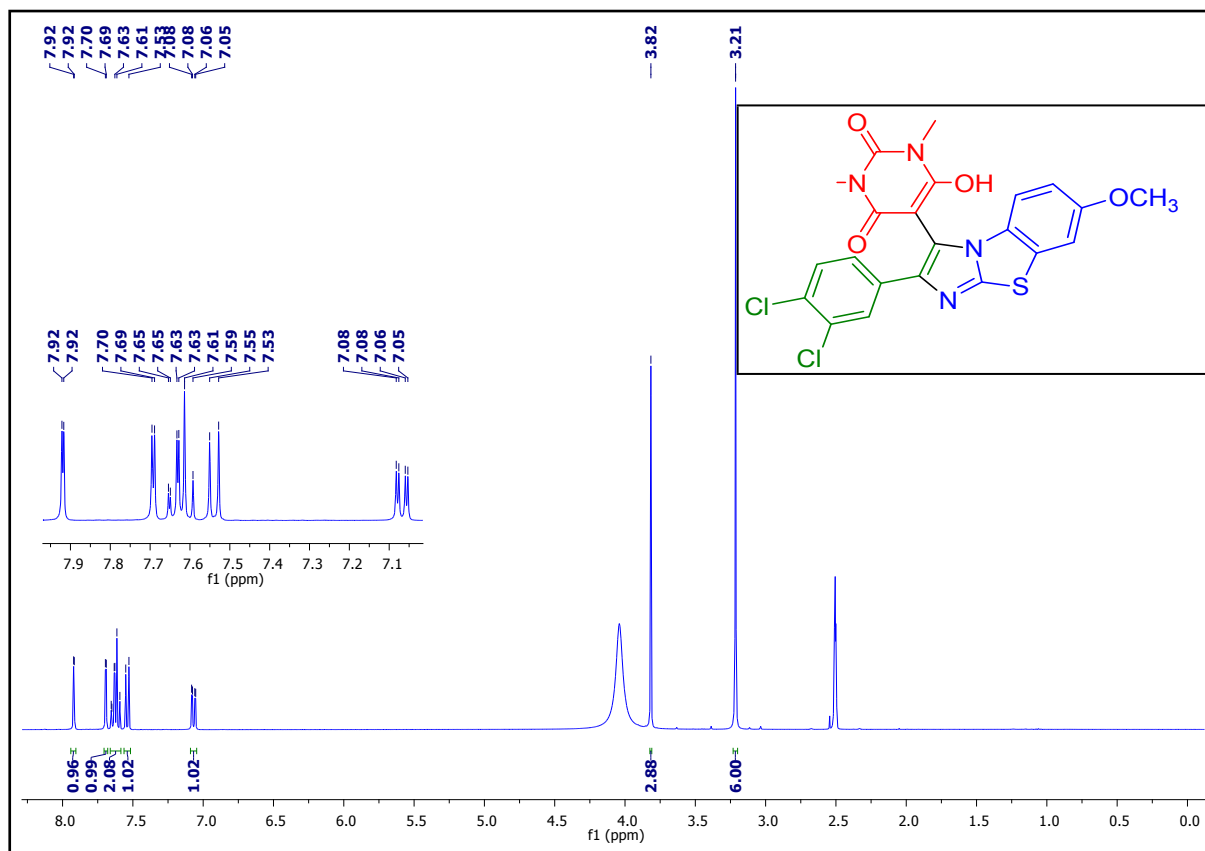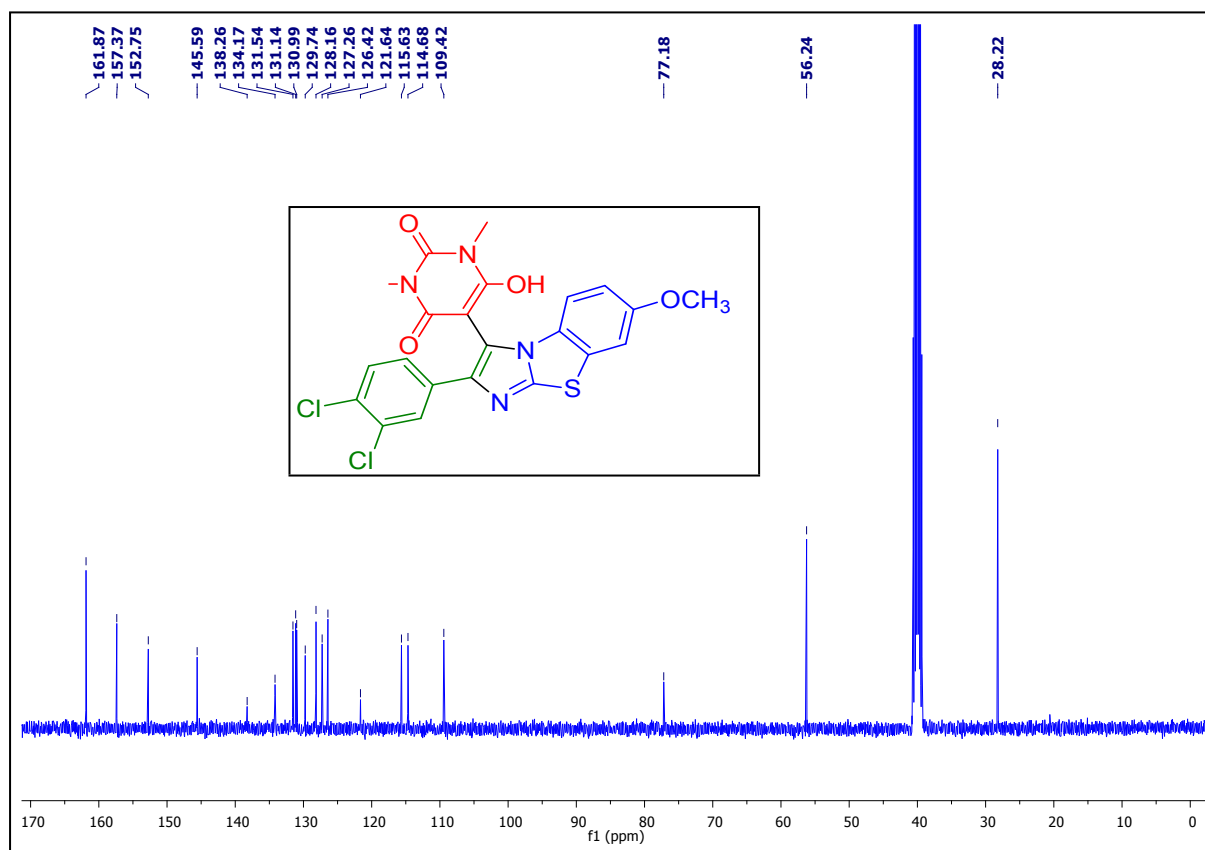

# $^1\text{H}$ and $^{13}\text{C}$ NMR spectra of 6g

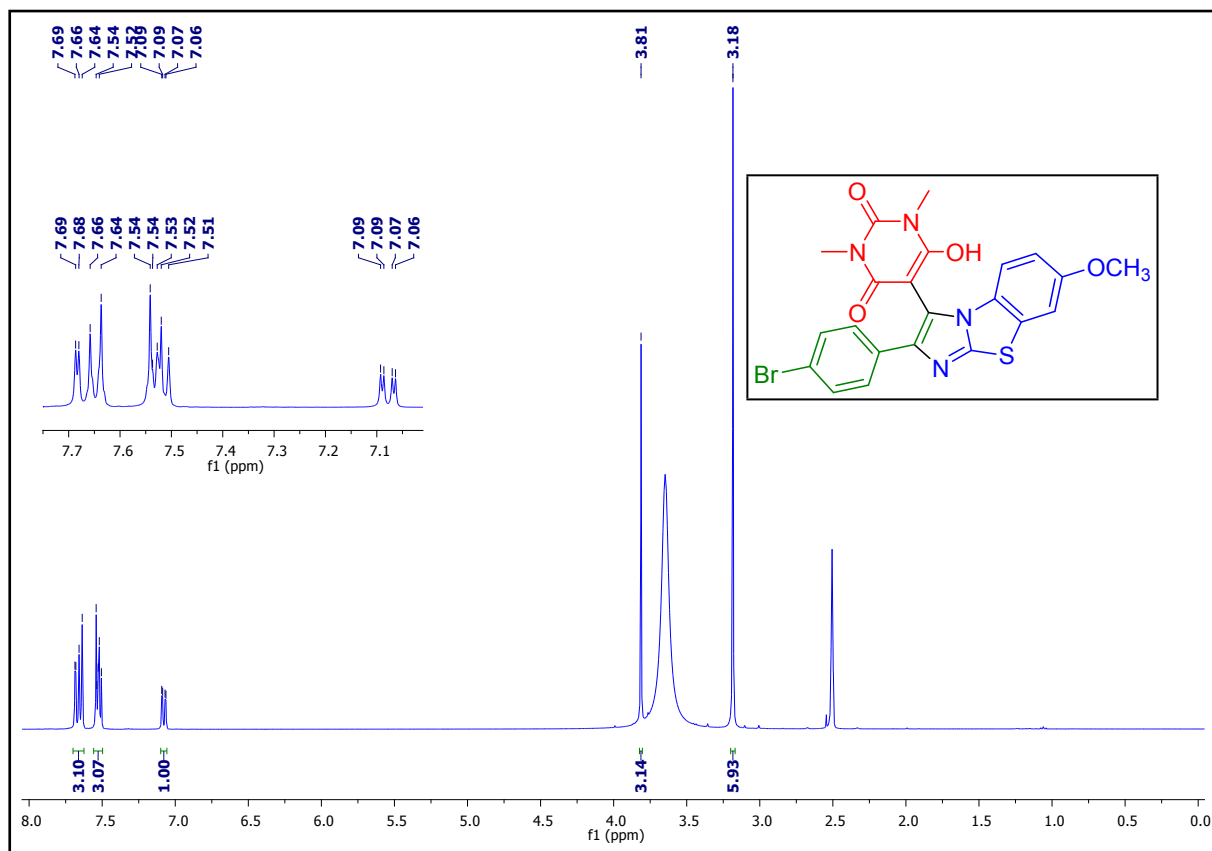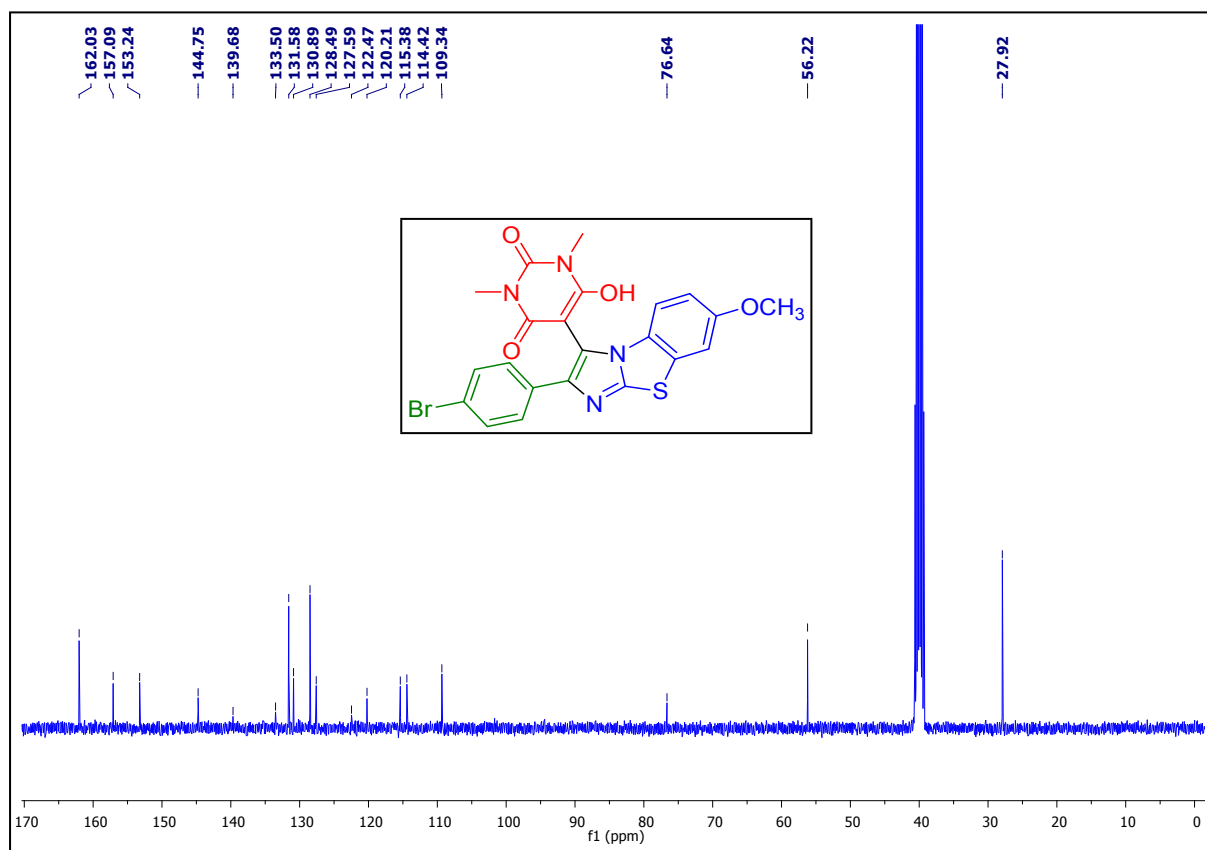

# $^1\text{H}$ and $^{13}\text{C}$ NMR spectra of 6h

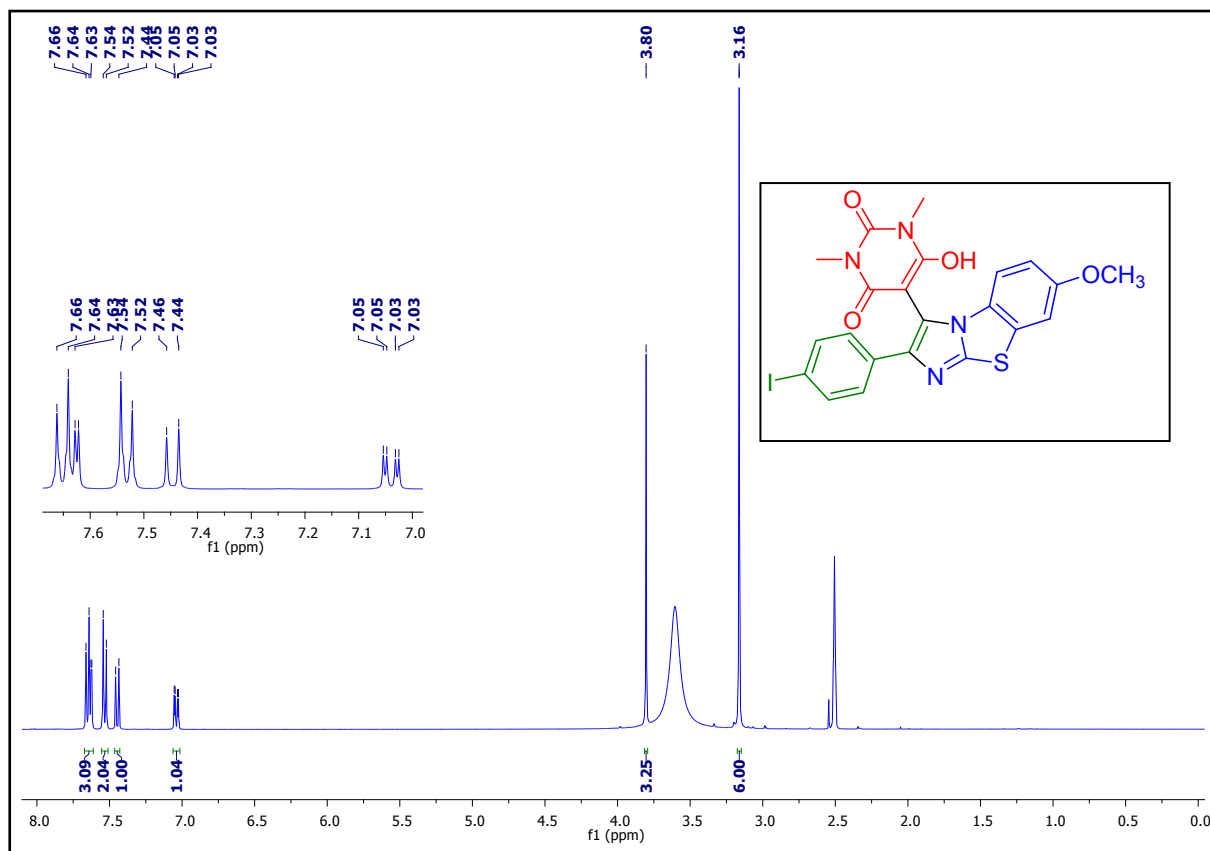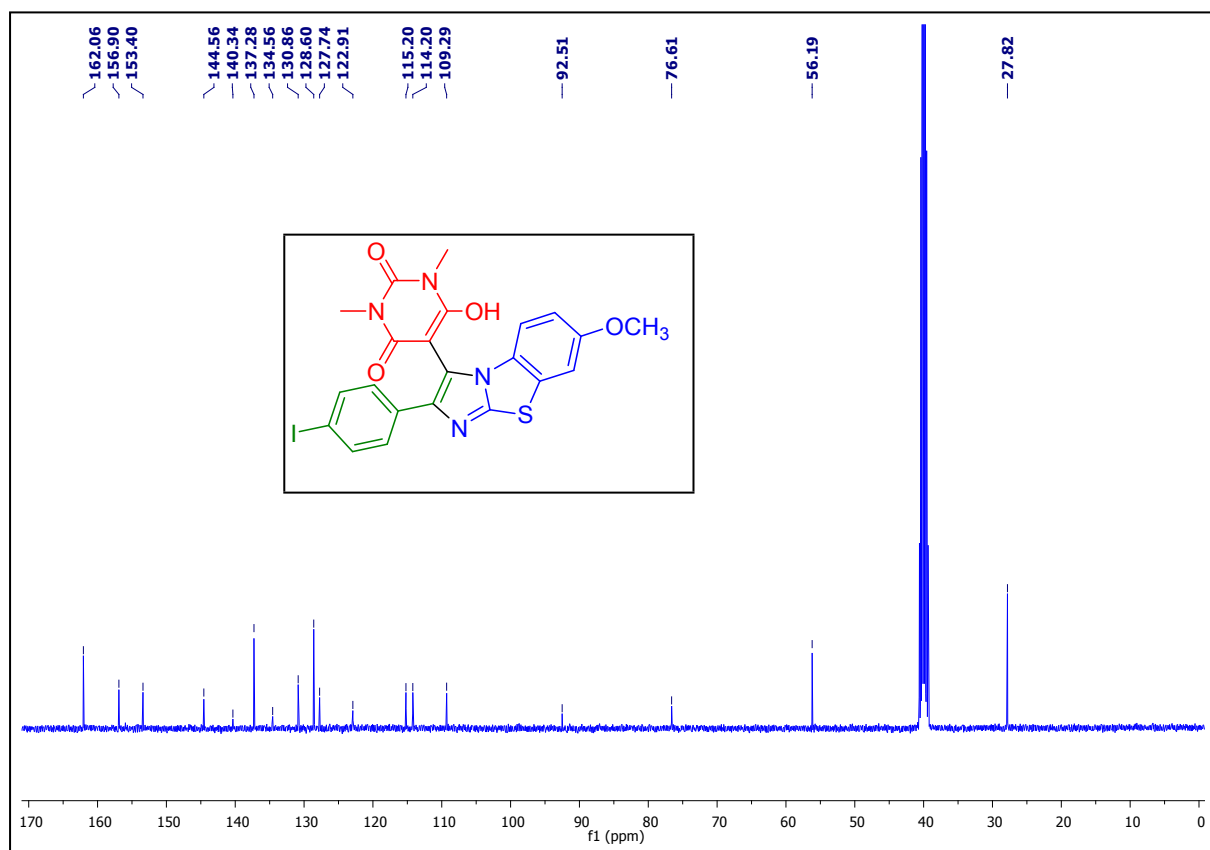

# $^1\text{H}$ and $^{13}\text{C}$ NMR spectra of 6i

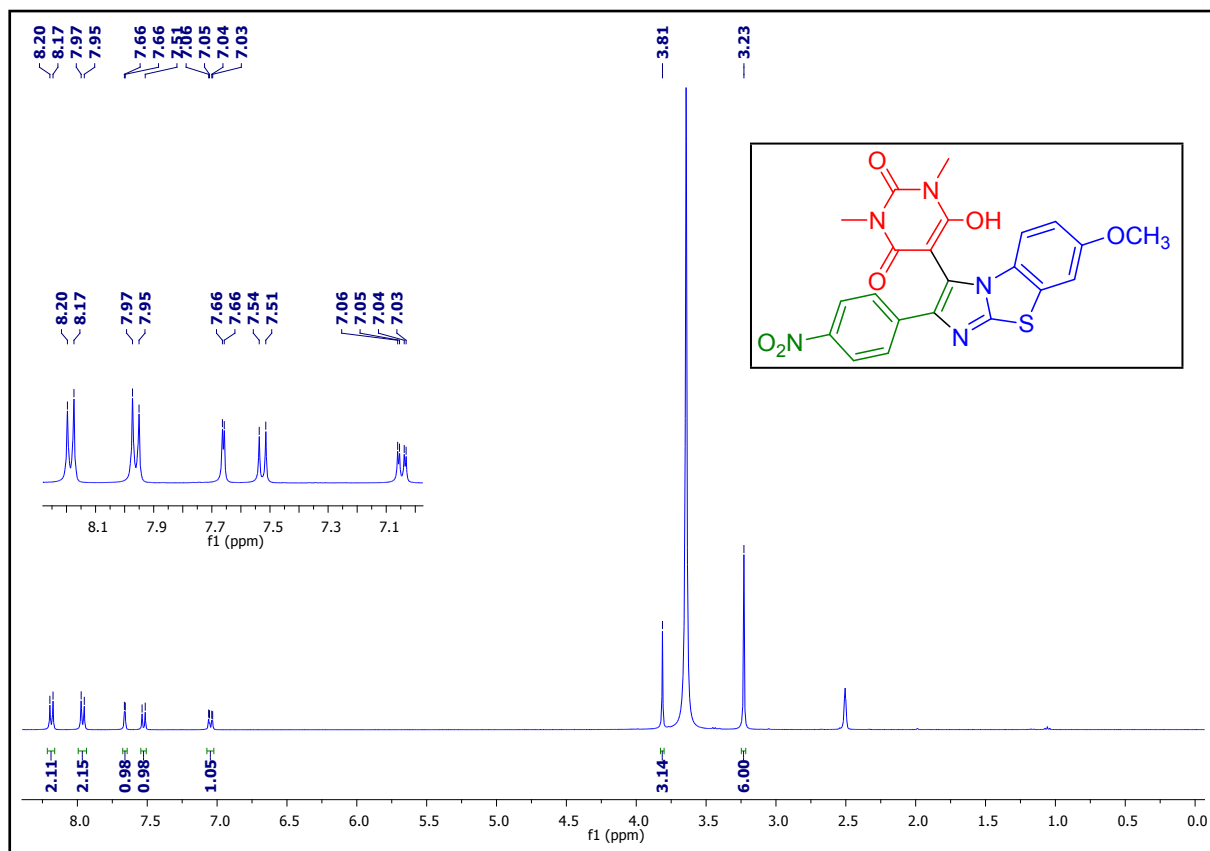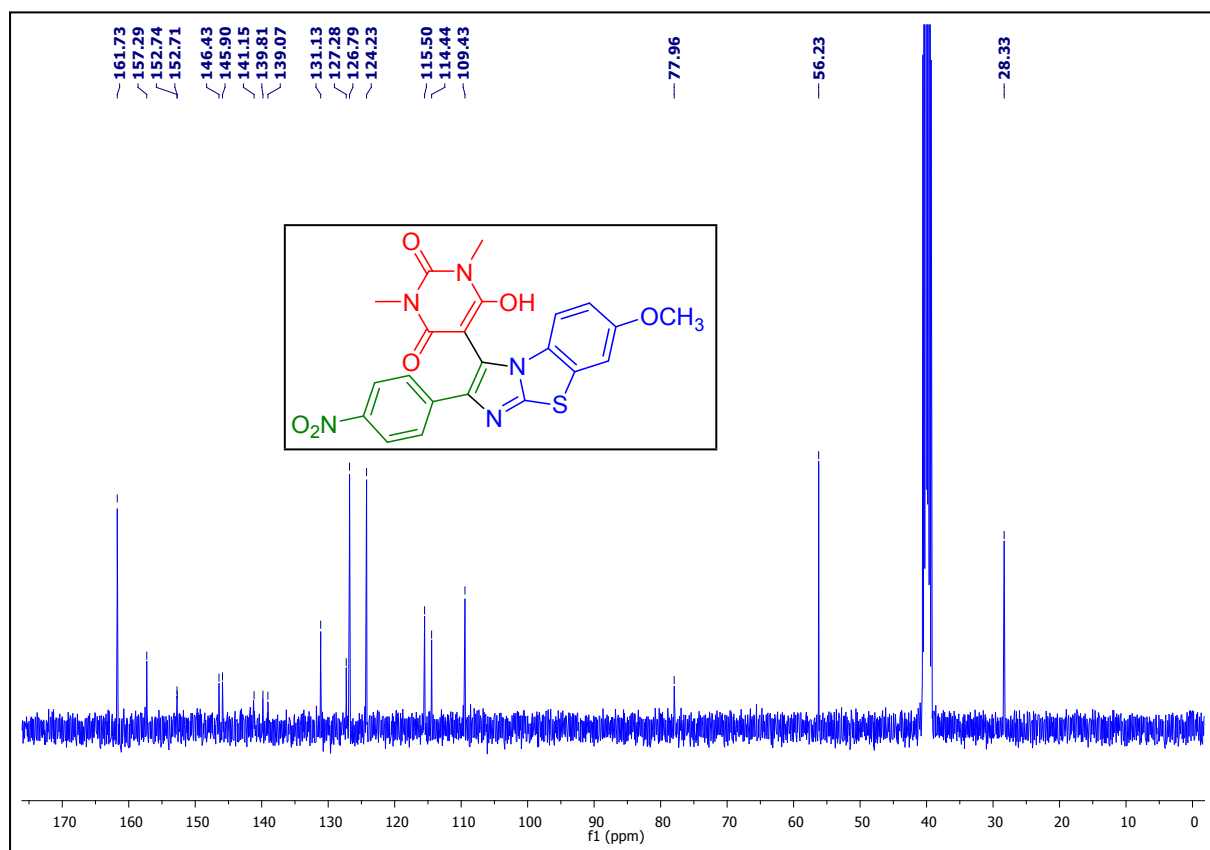

# $^1\text{H}$ and $^{13}\text{C}$ NMR spectra of 6j

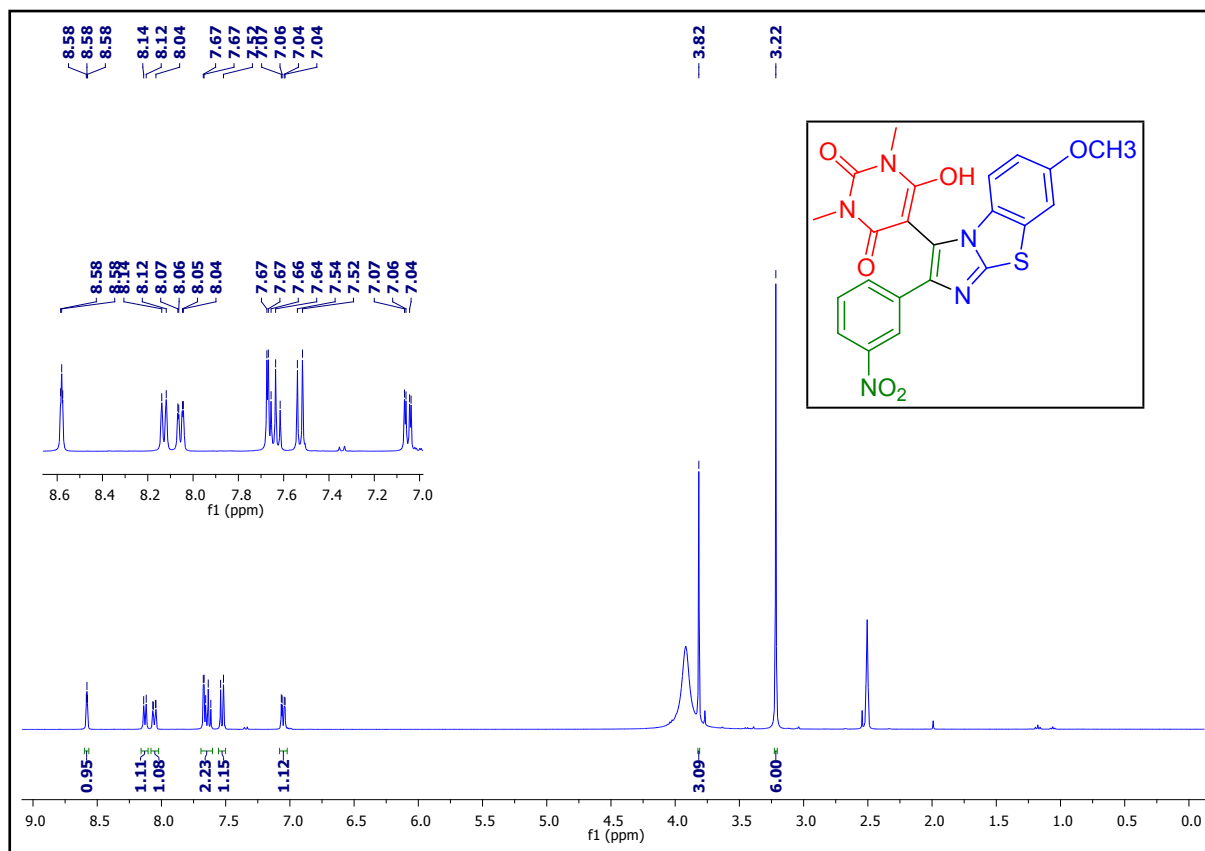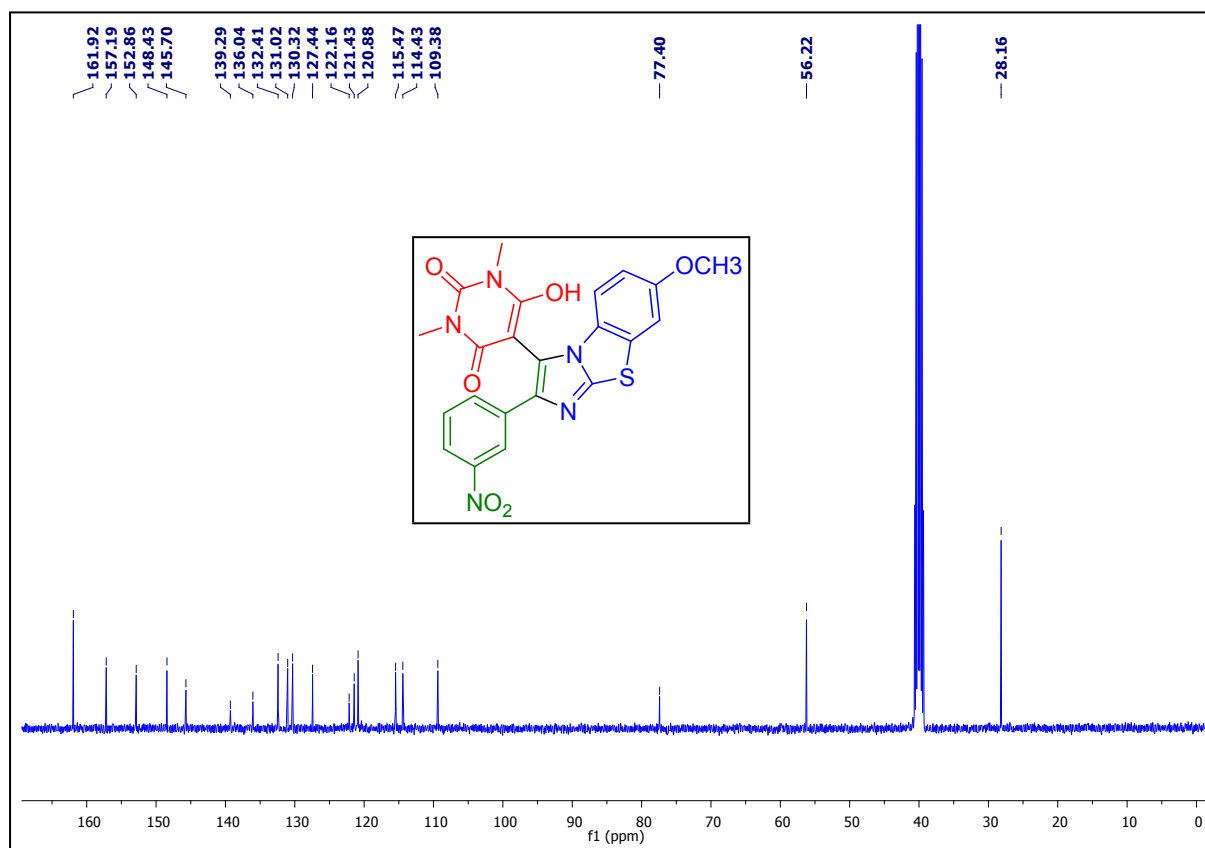

# <sup>1</sup>H and <sup>13</sup>C NMR spectra of 6k

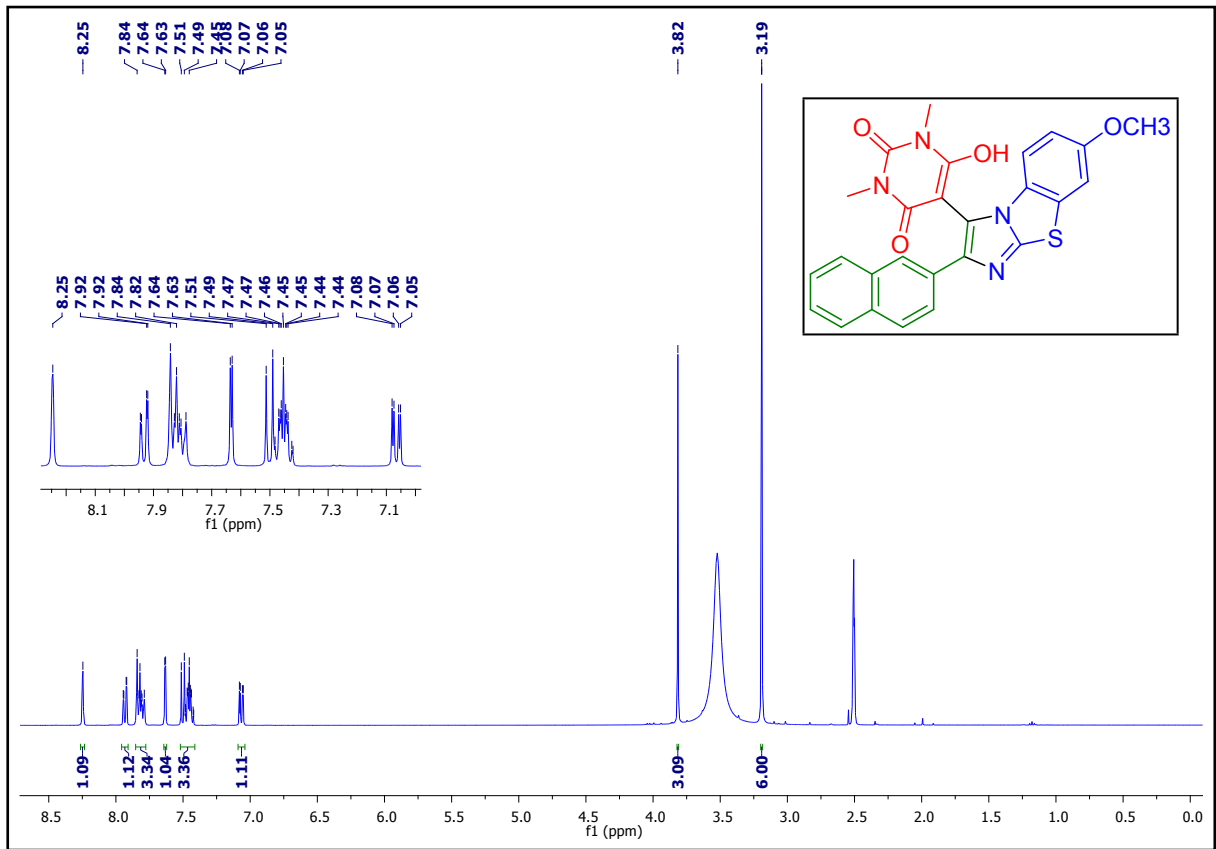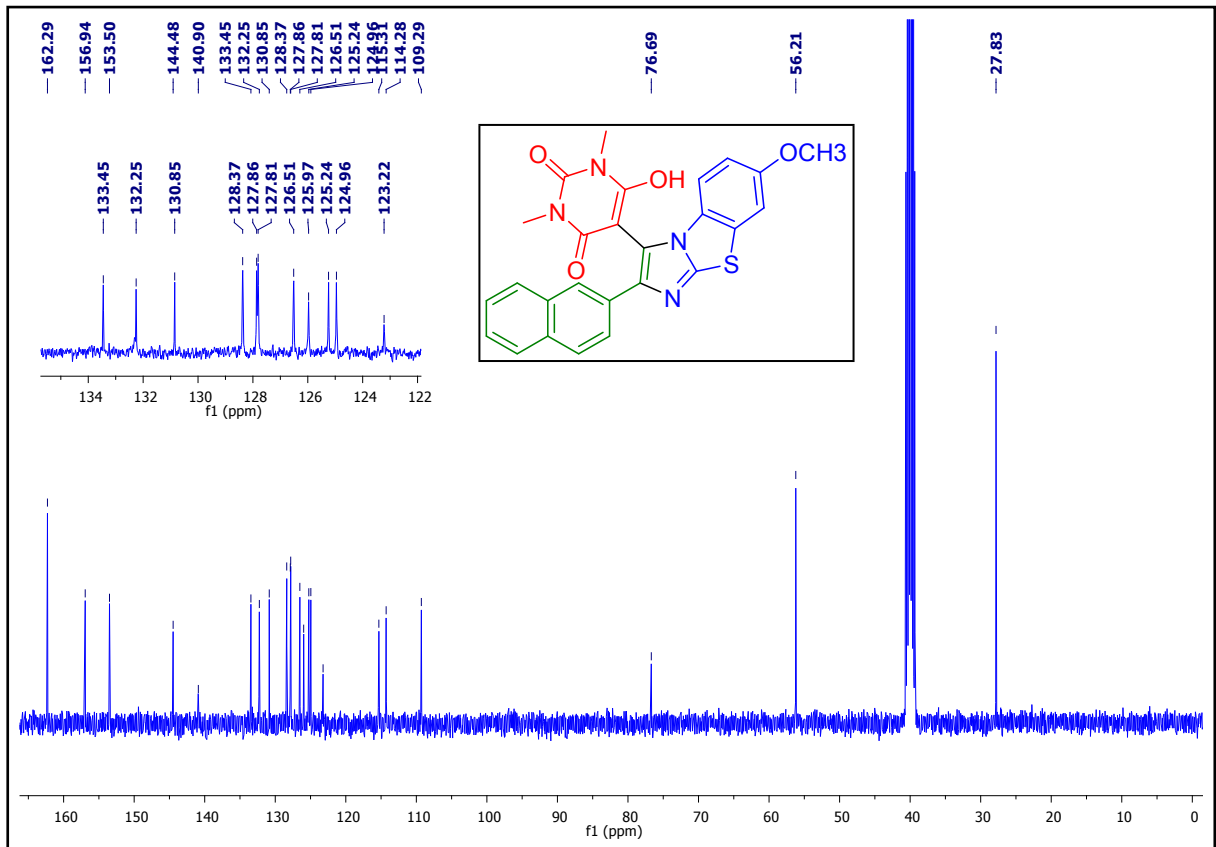

# $^1\text{H}$ and $^{13}\text{C}$ NMR spectra of 6l

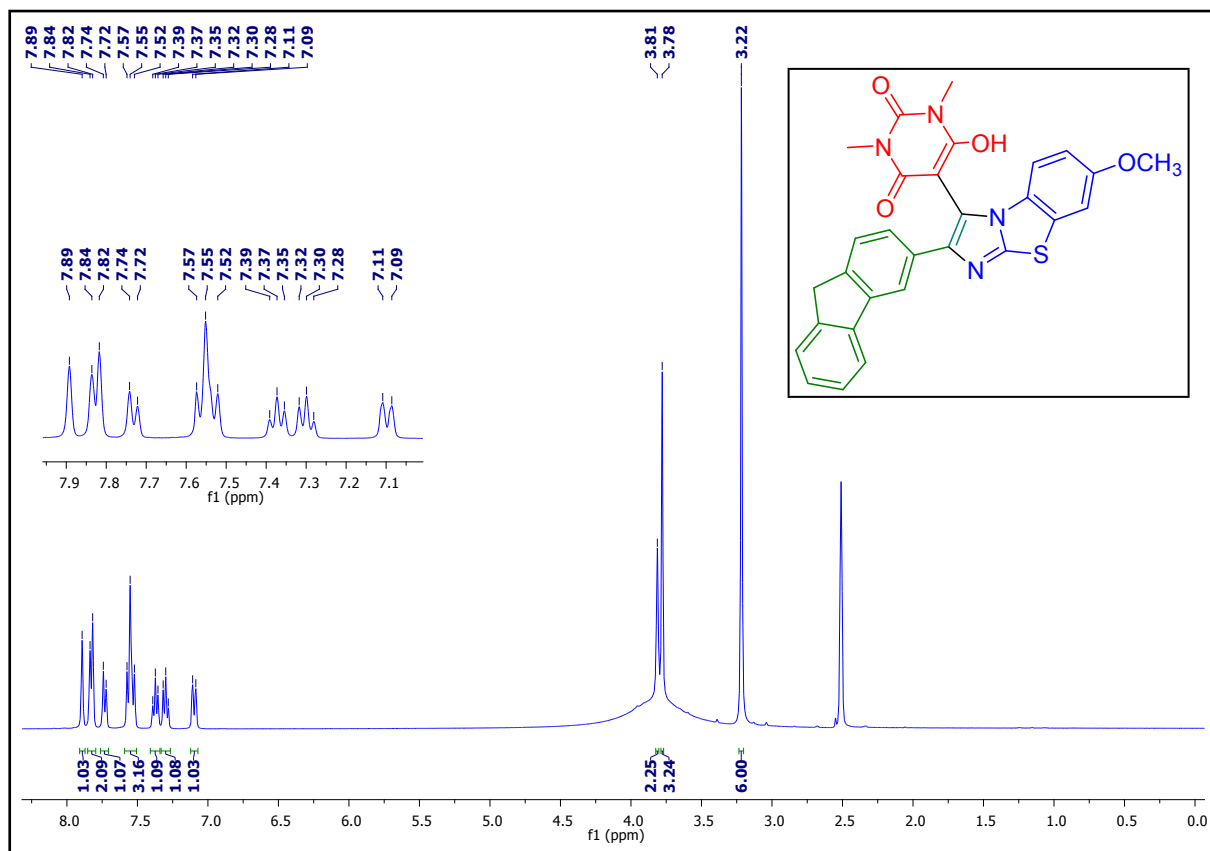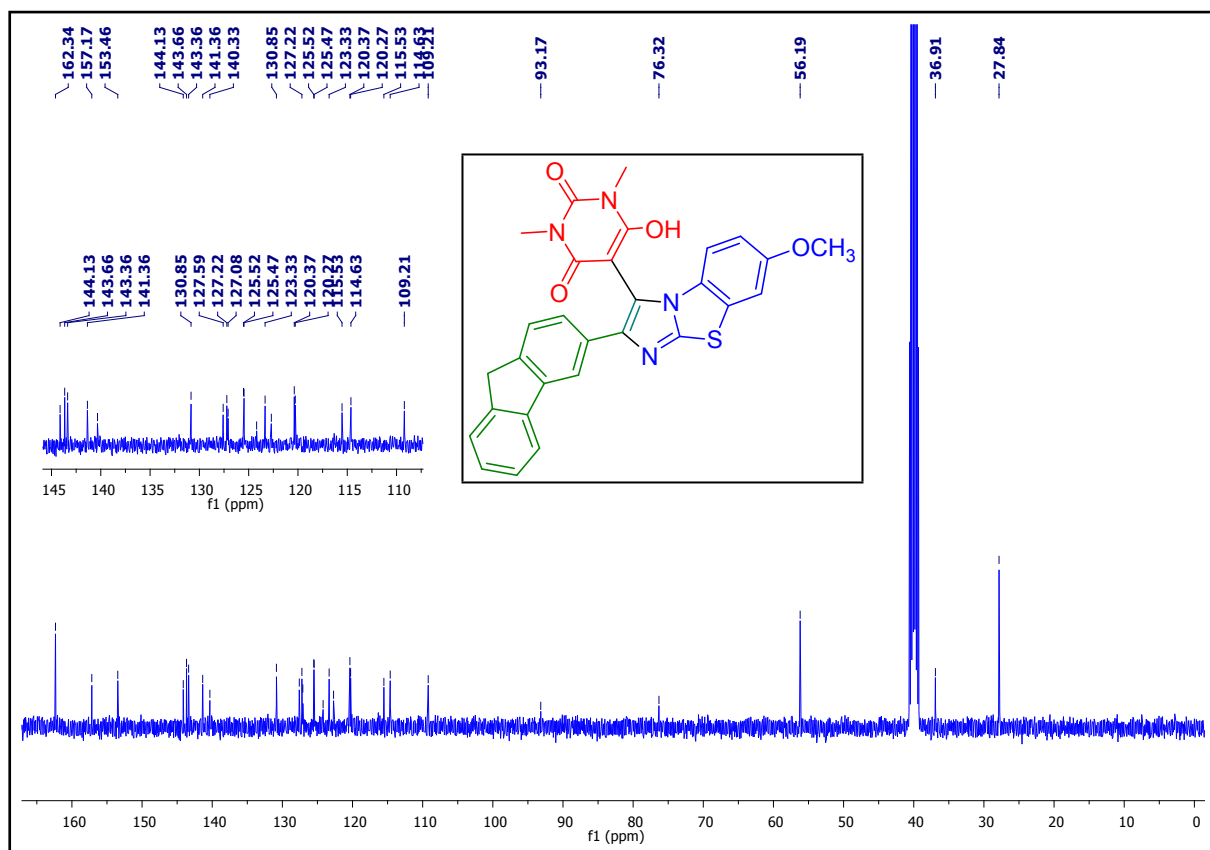

# $^1\text{H}$ and $^{13}\text{C}$ NMR spectra of 6m

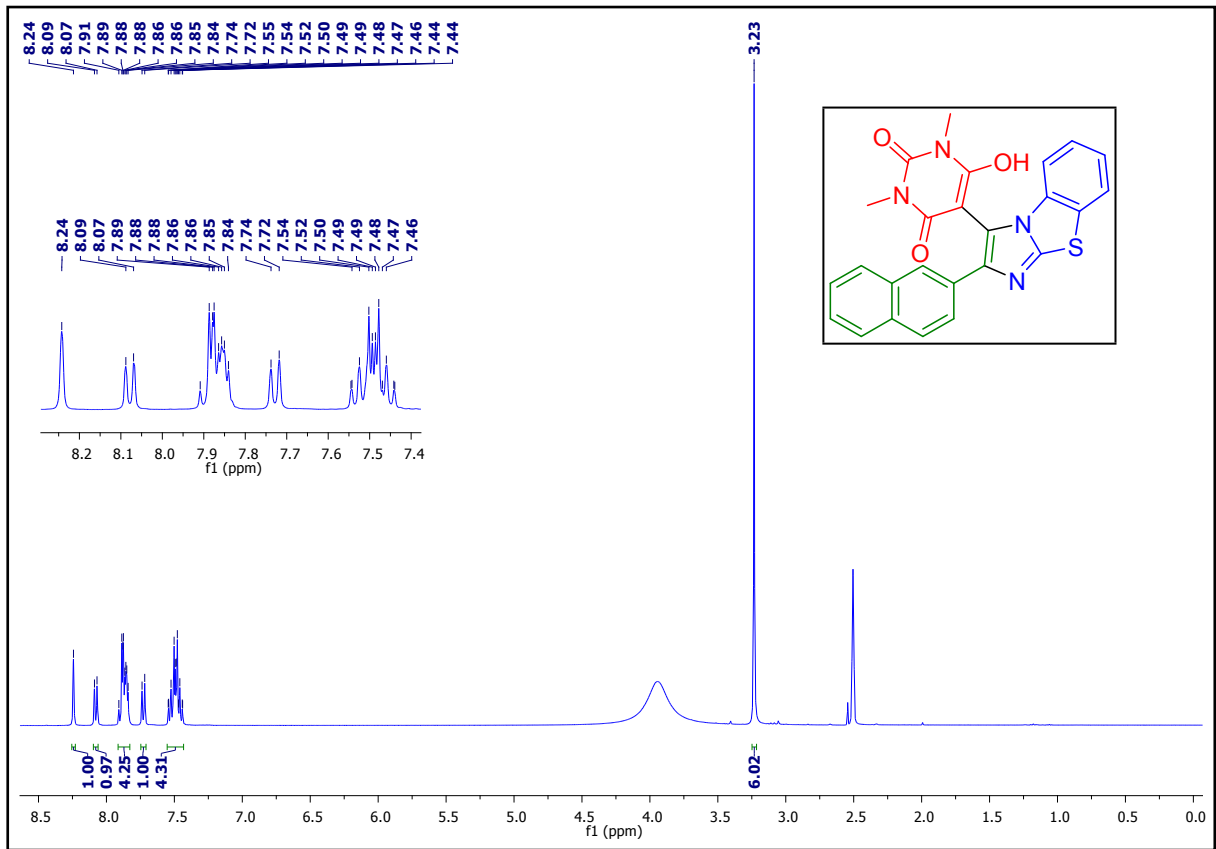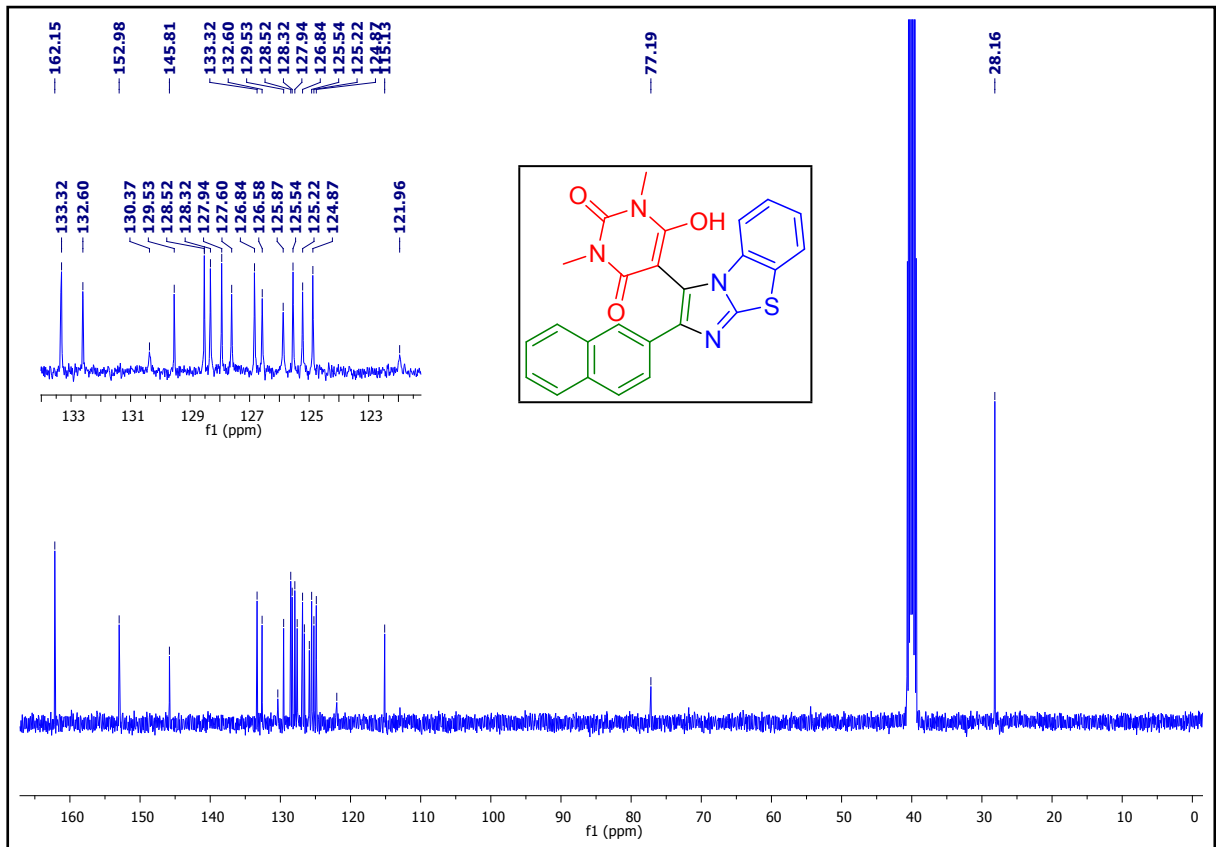



# $^1\text{H}$ and $^{13}\text{C}$ NMR spectra of 6n

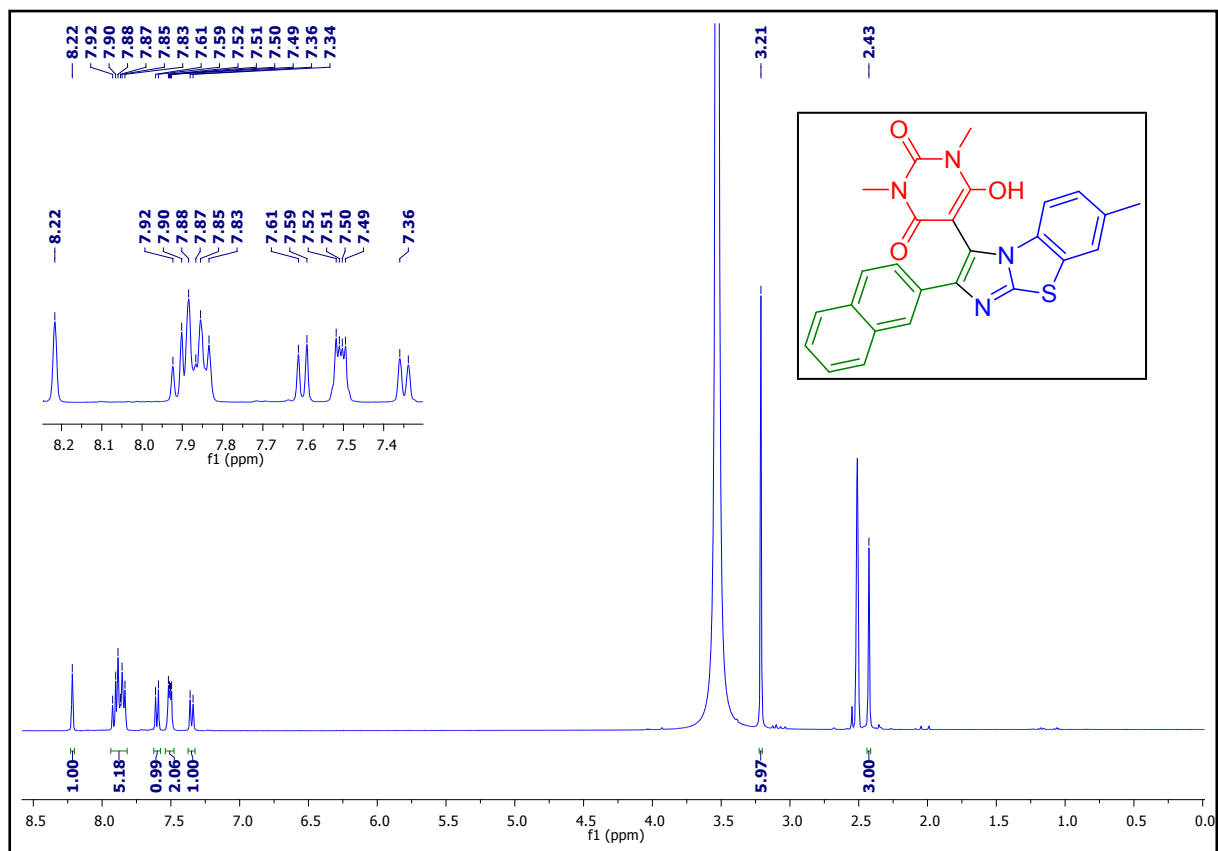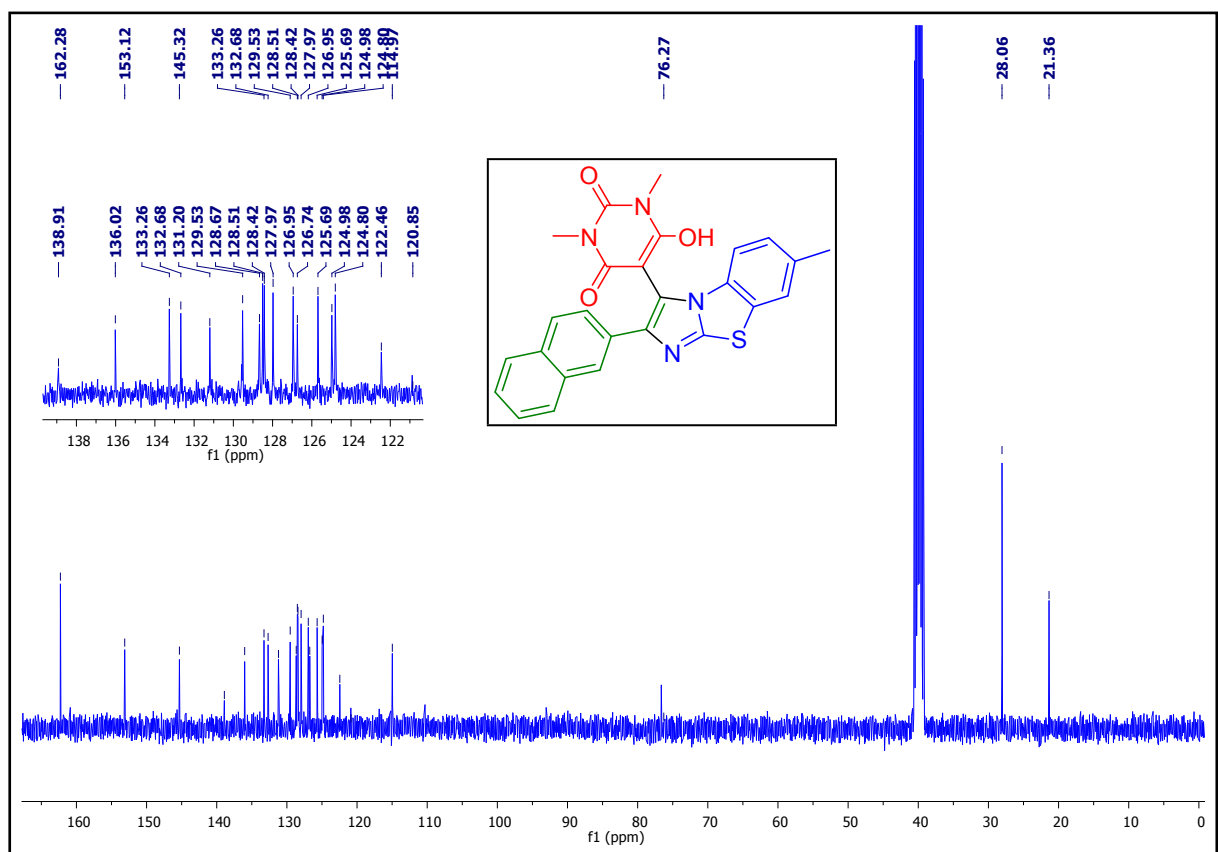

# $^1\text{H}$ and $^{13}\text{C}$ NMR spectra of 60

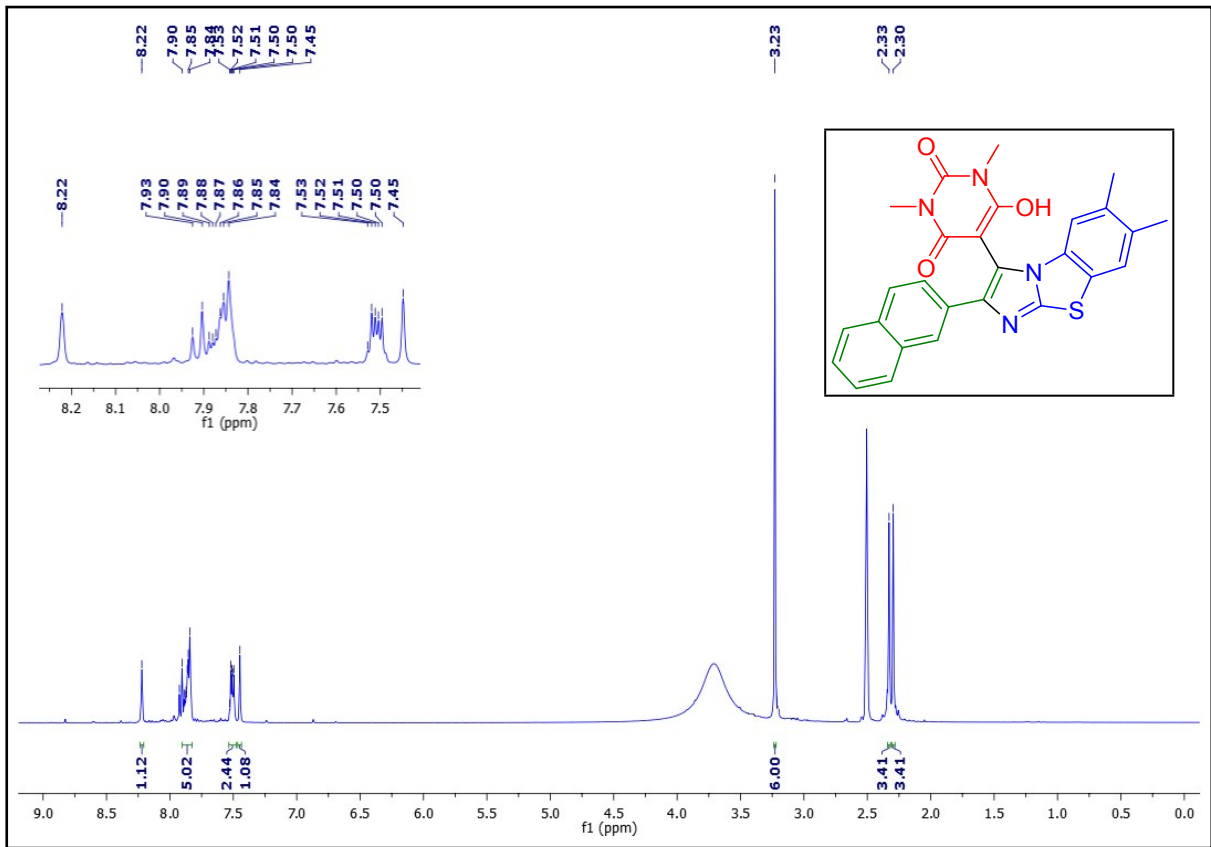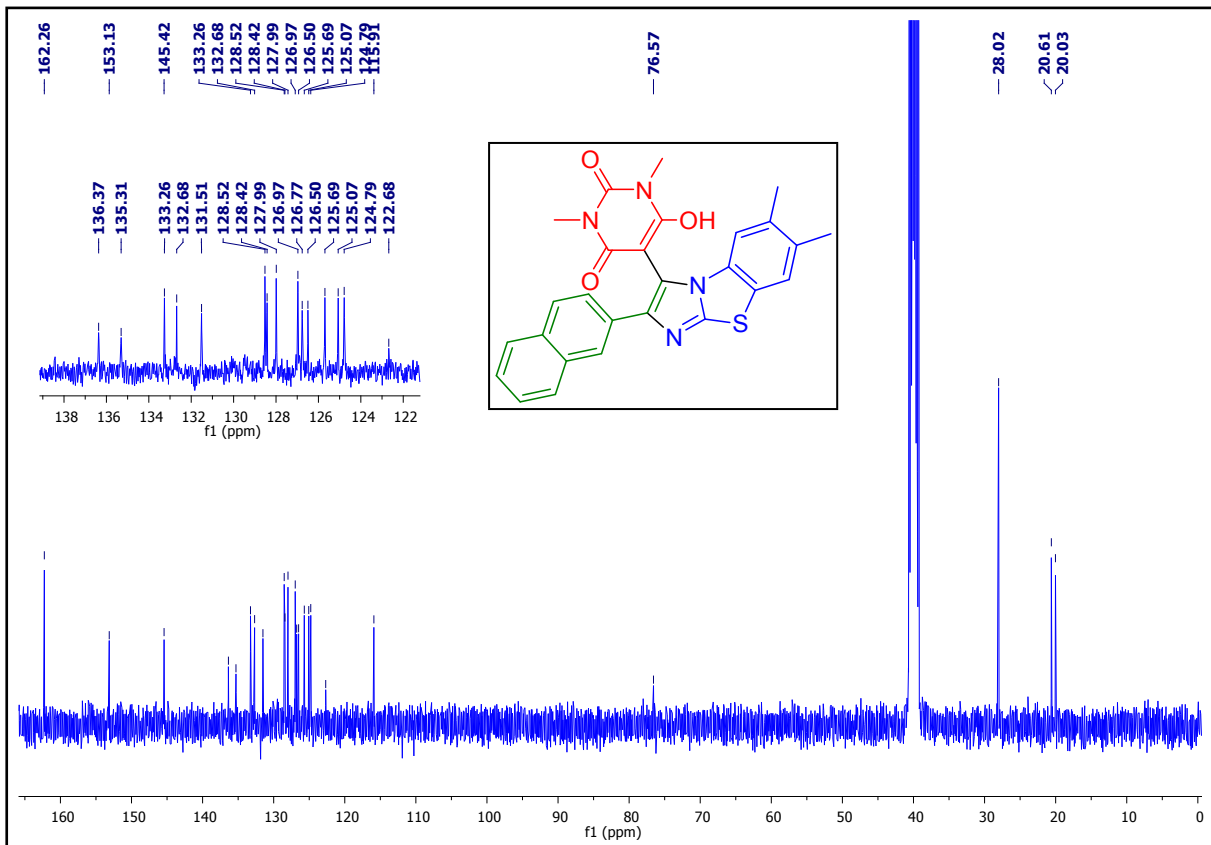

# $^1\text{H}$ and $^{13}\text{C}$ NMR spectra of 6p

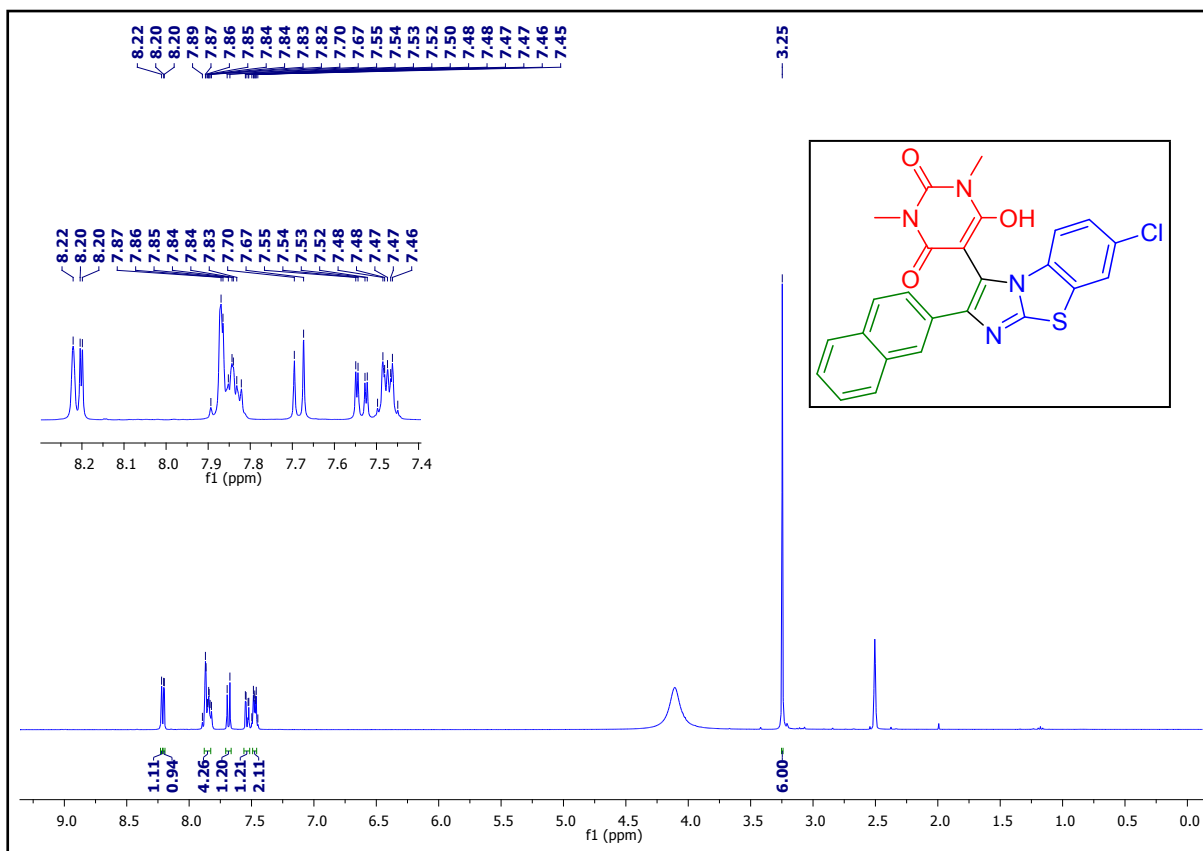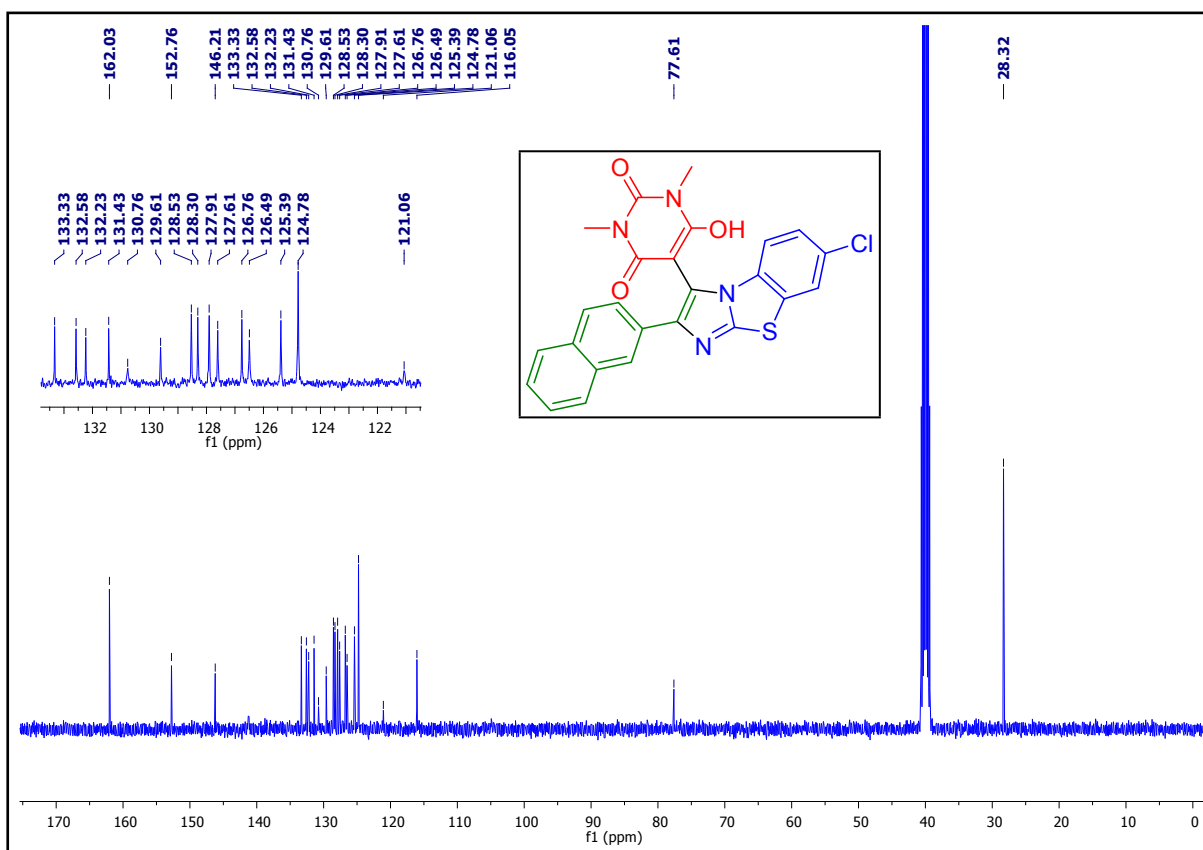

# $^1\text{H}$ and $^{13}\text{C}$ NMR spectra of 6q

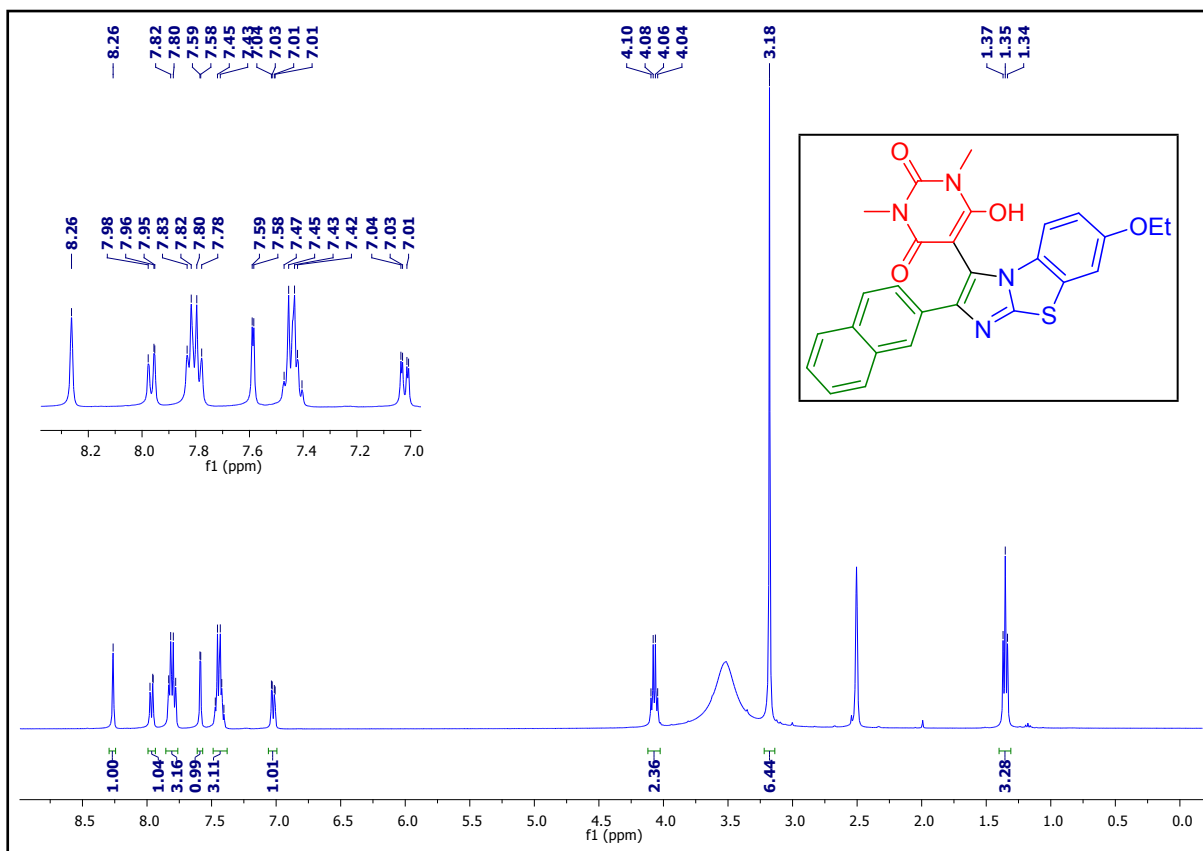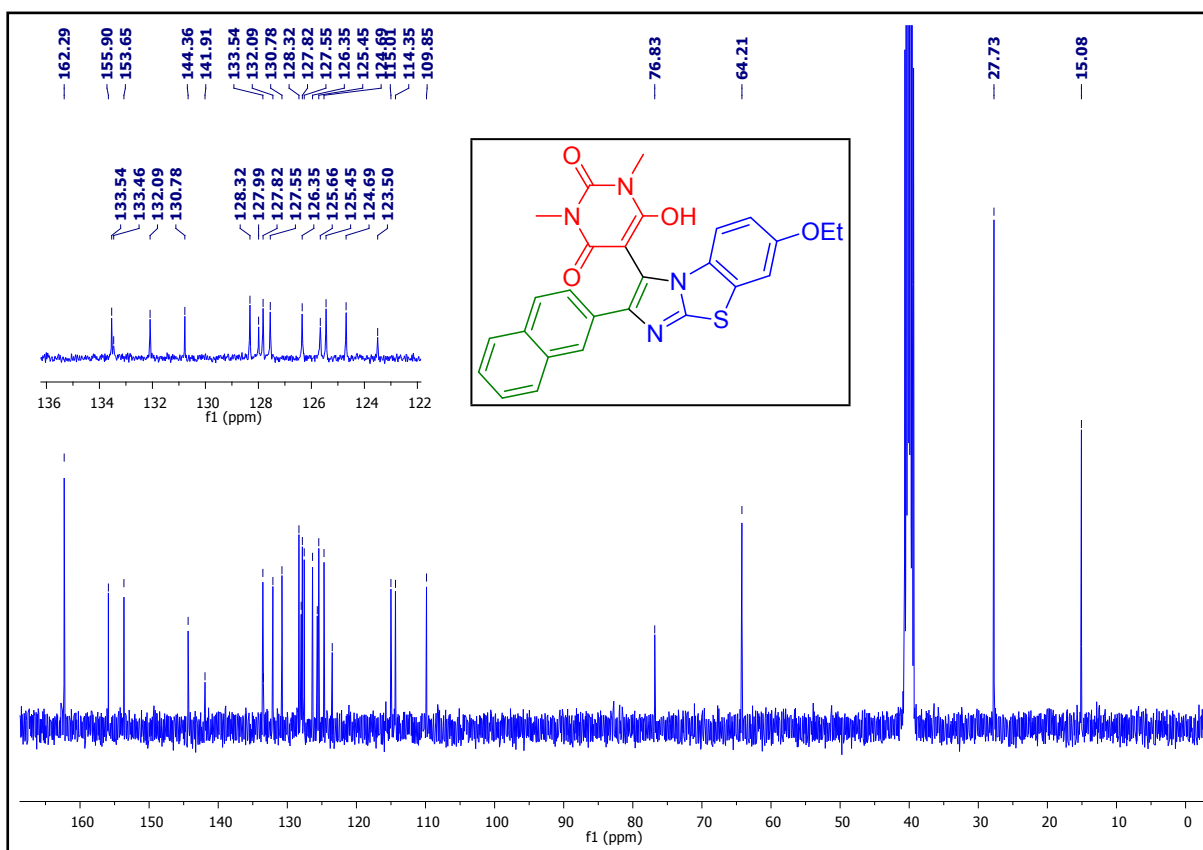

# $^1\text{H}$ and $^{13}\text{C}$ NMR spectra of 6r

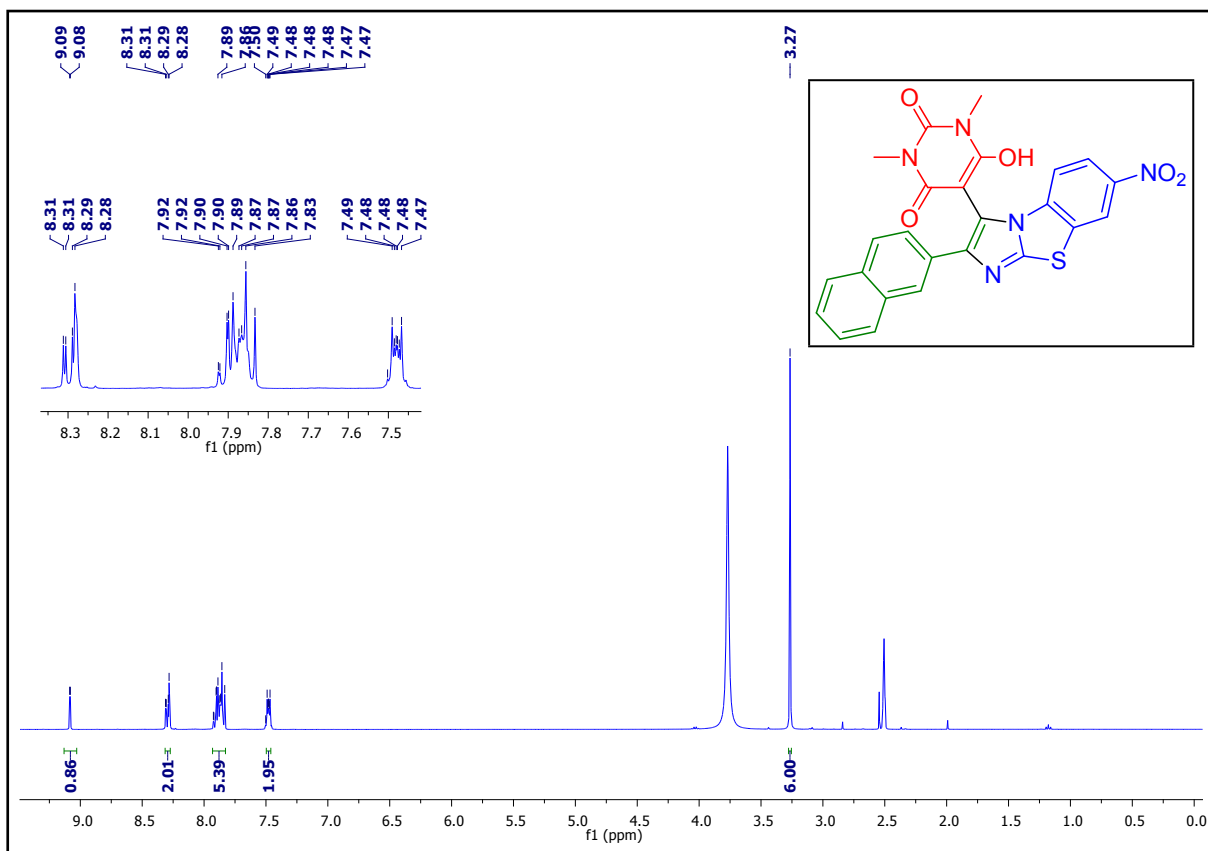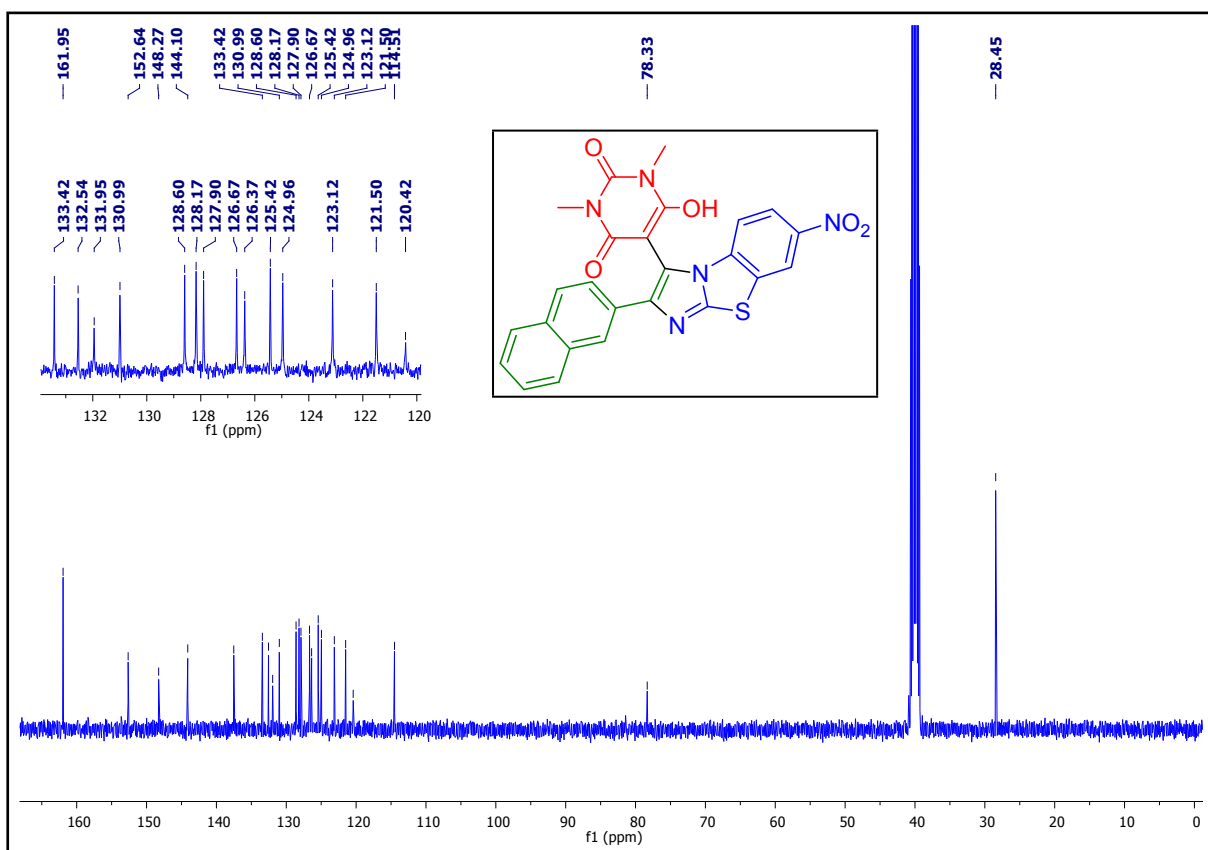

# $^1\text{H}$ and $^{13}\text{C}$ NMR spectra of 6s

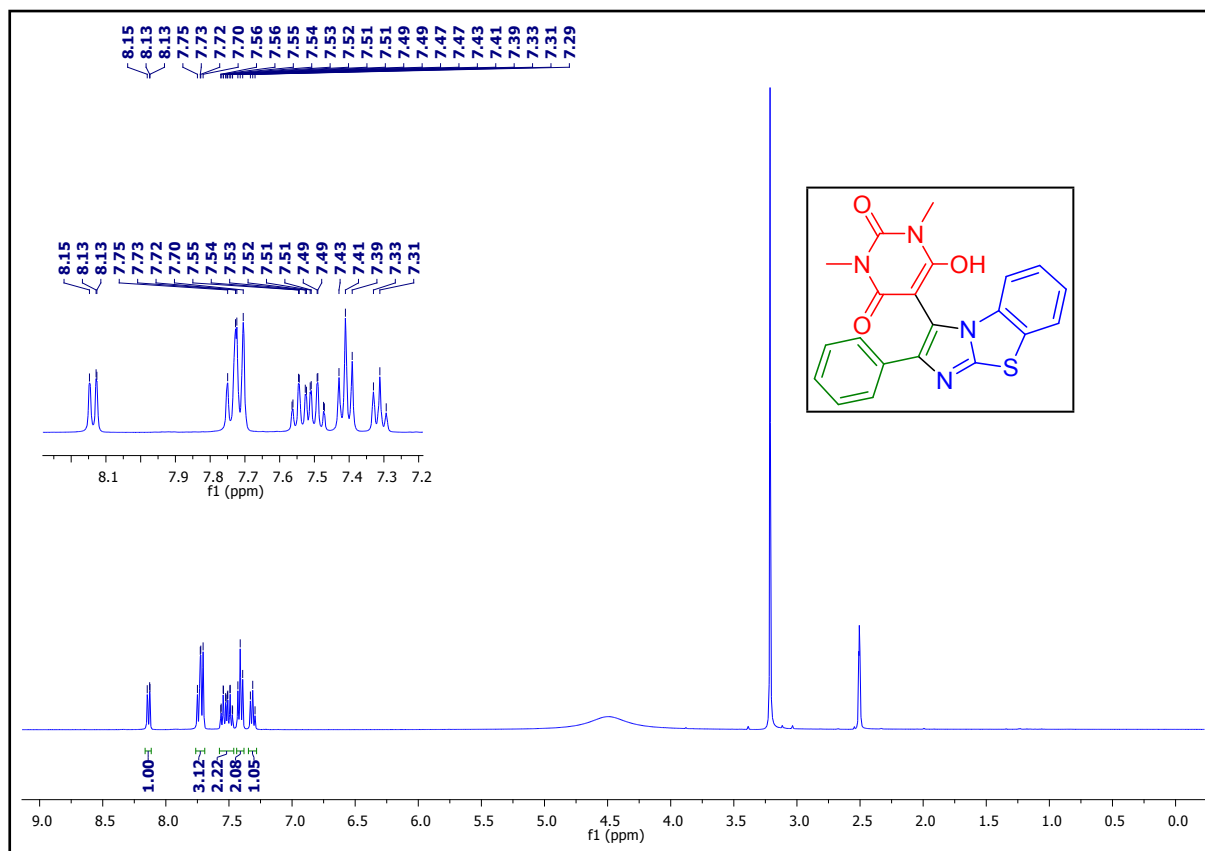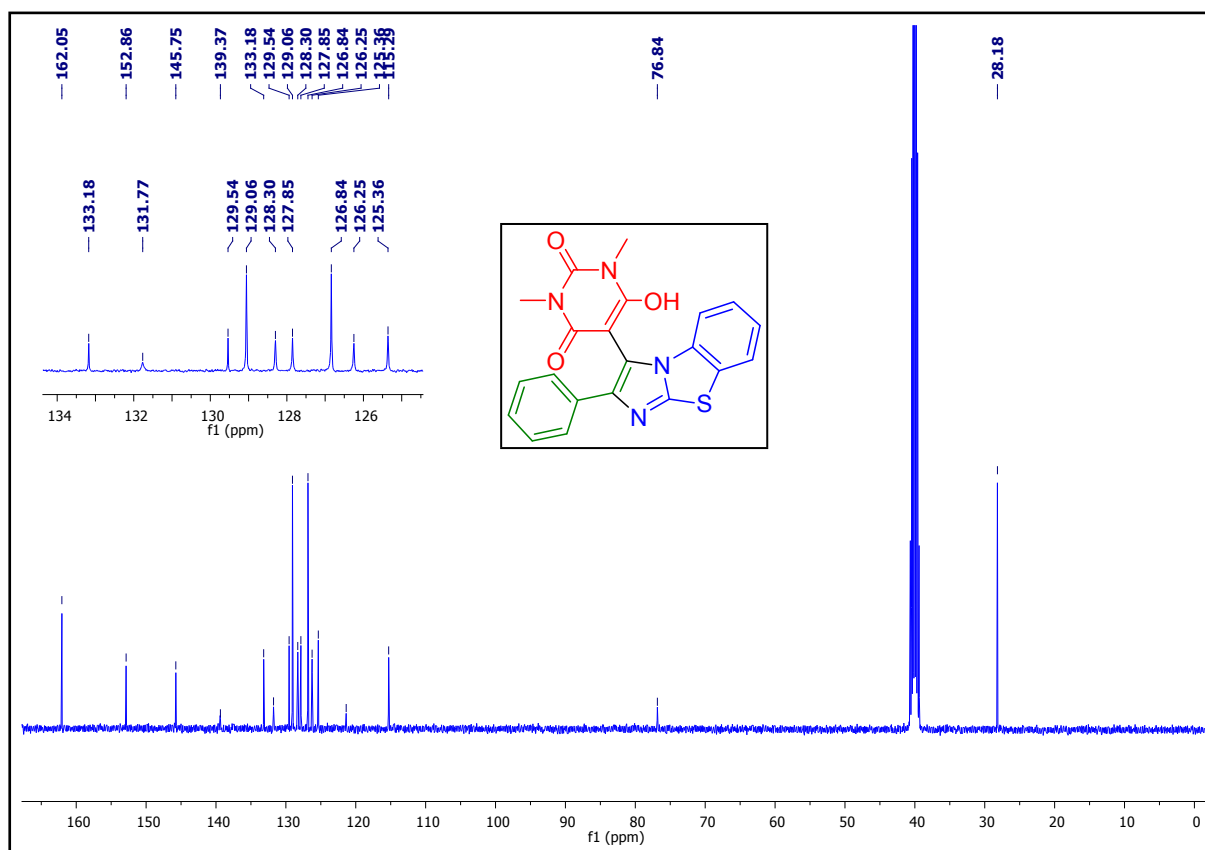

# $^1\text{H}$ and $^{13}\text{C}$ NMR spectra of 6t

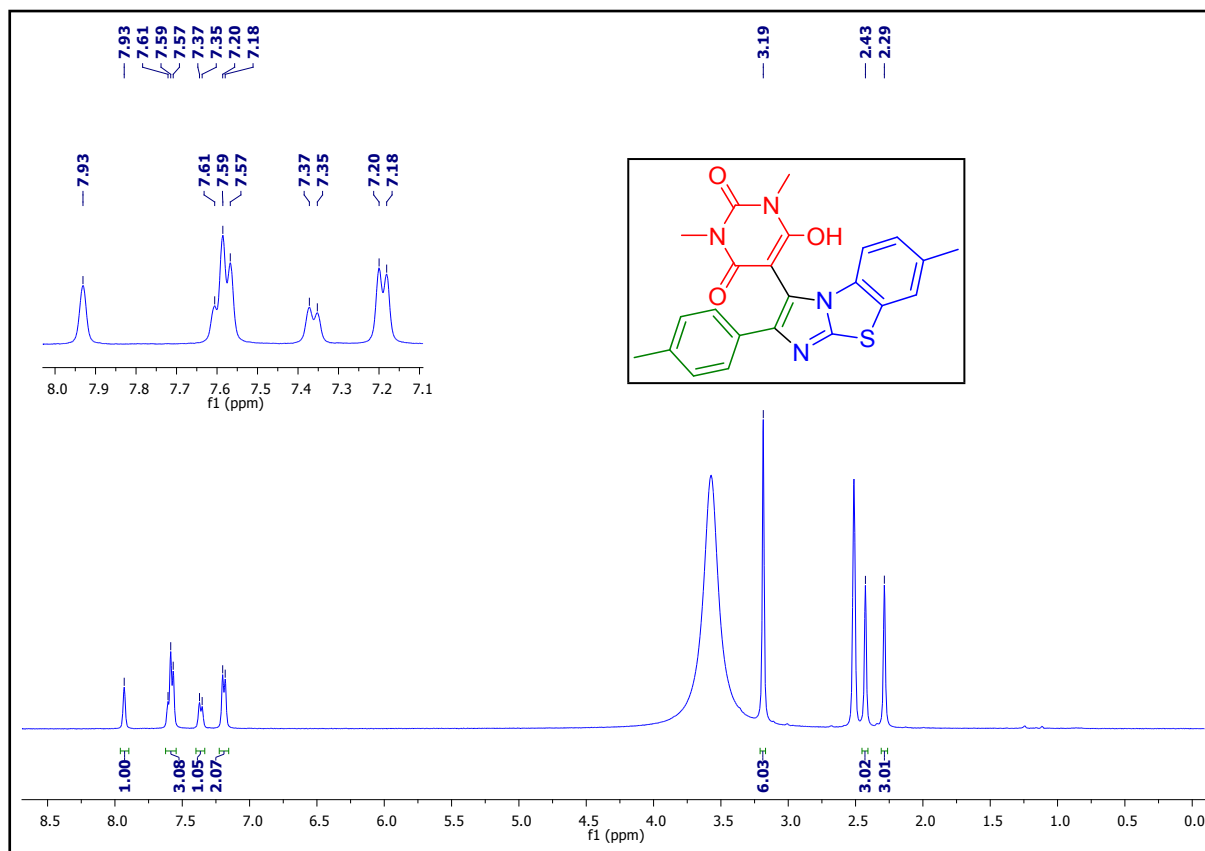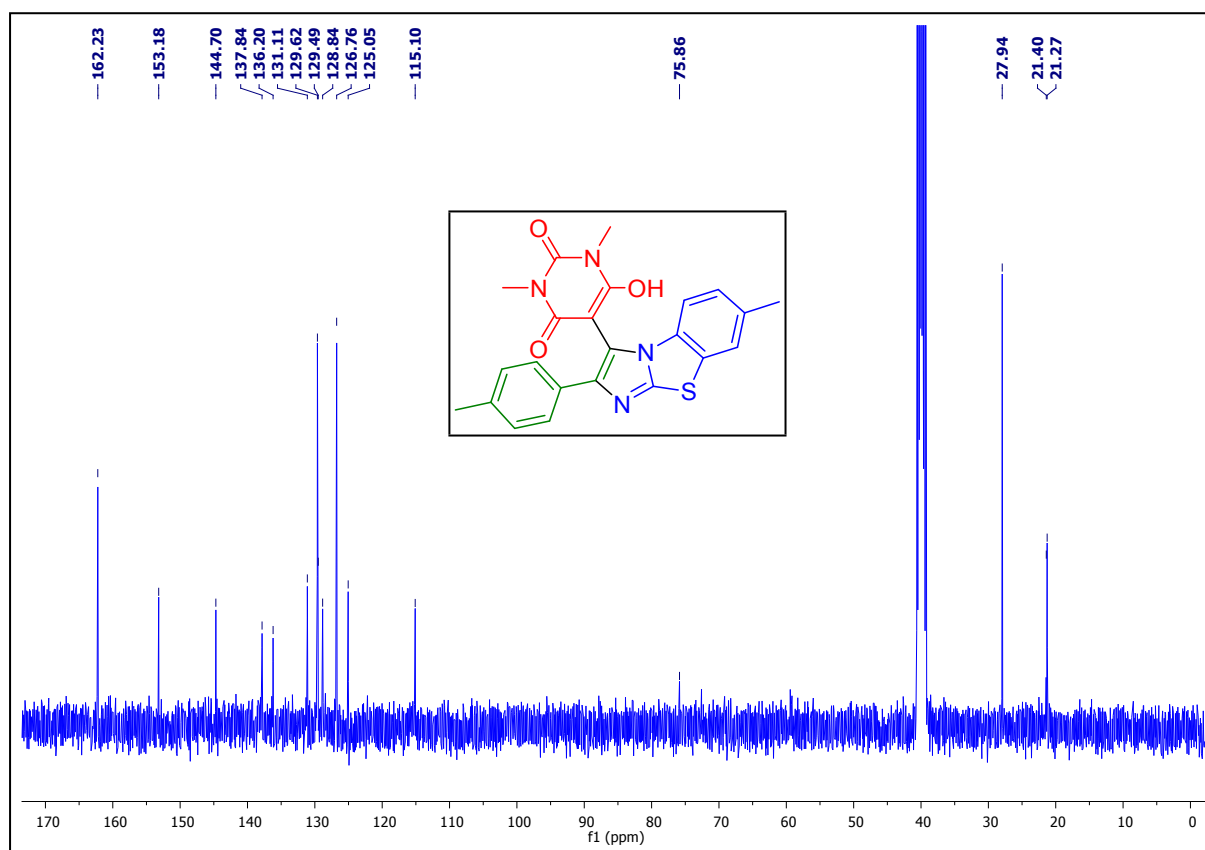

# $^1\text{H}$ and $^{13}\text{C}$ NMR spectra of 6u

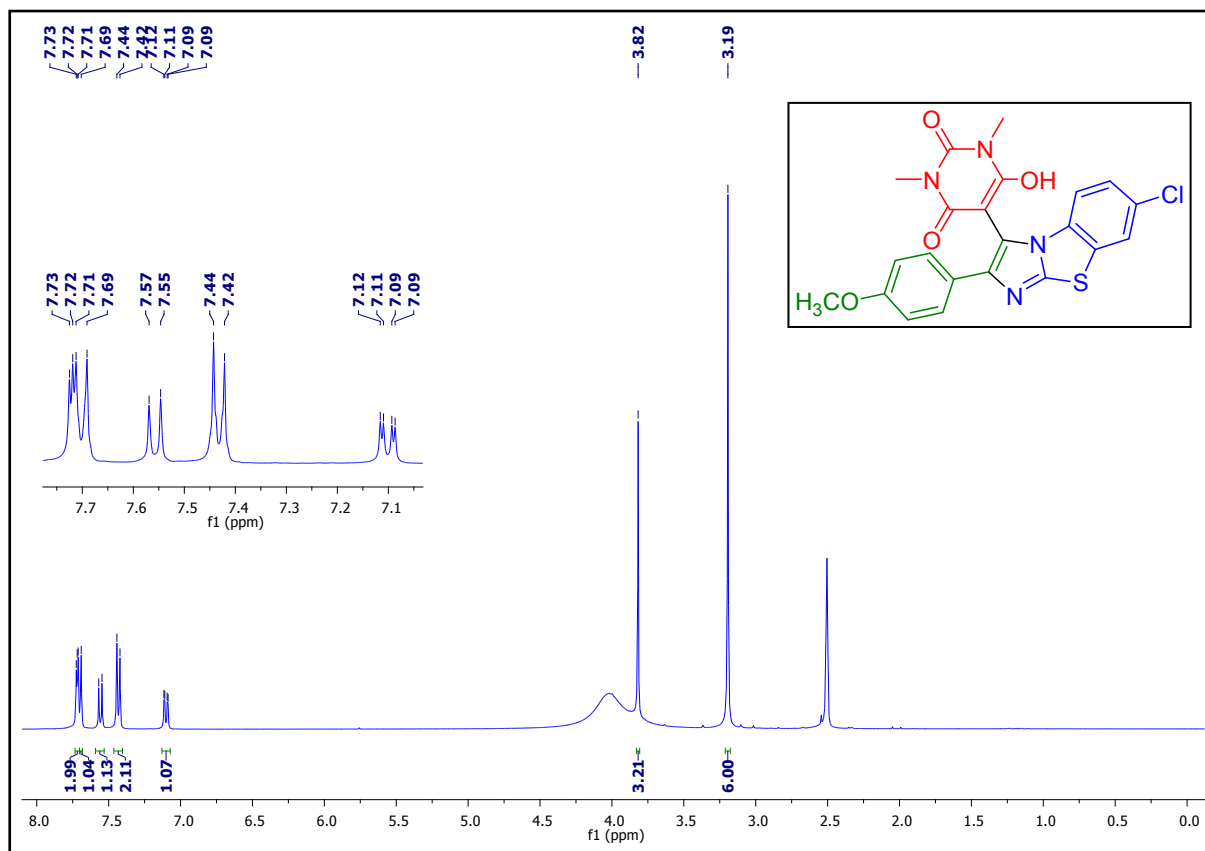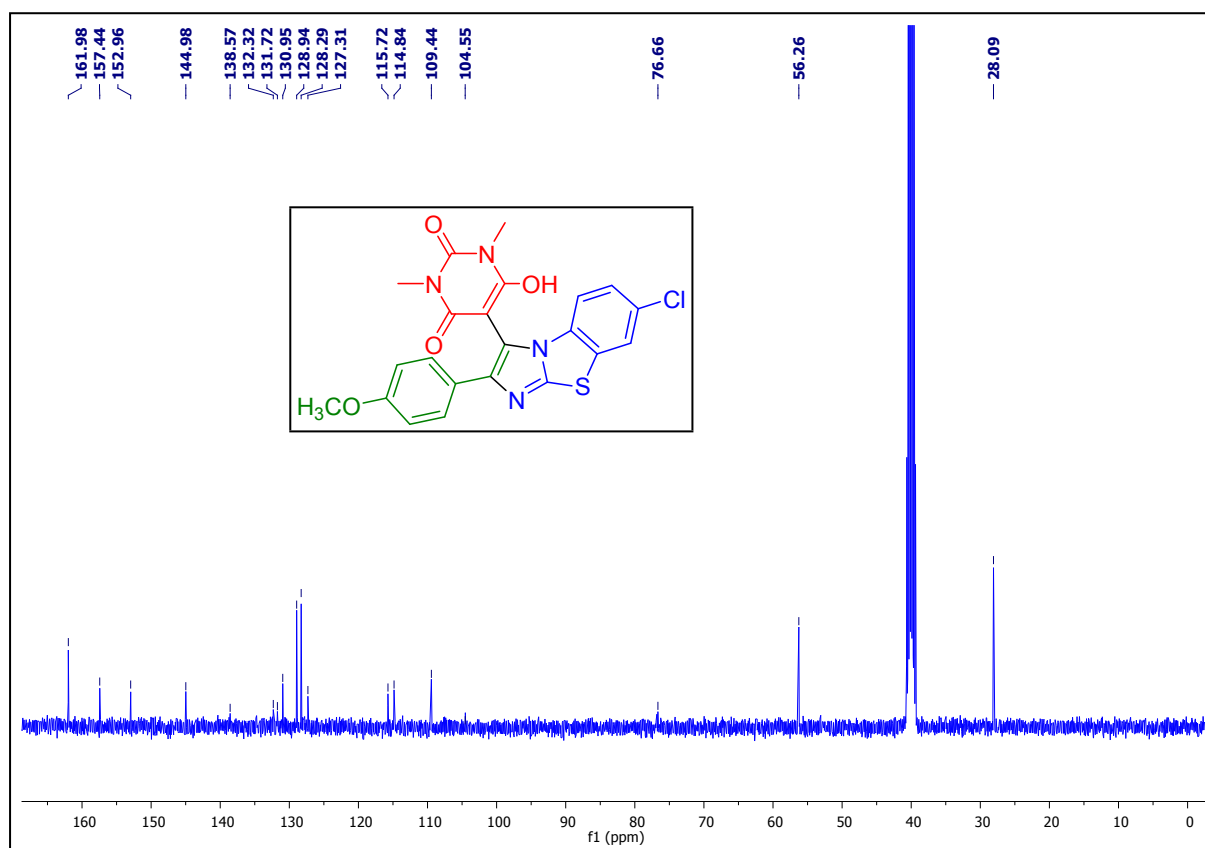



# $^1\text{H}$ and $^{13}\text{C}$ NMR spectra of 6v

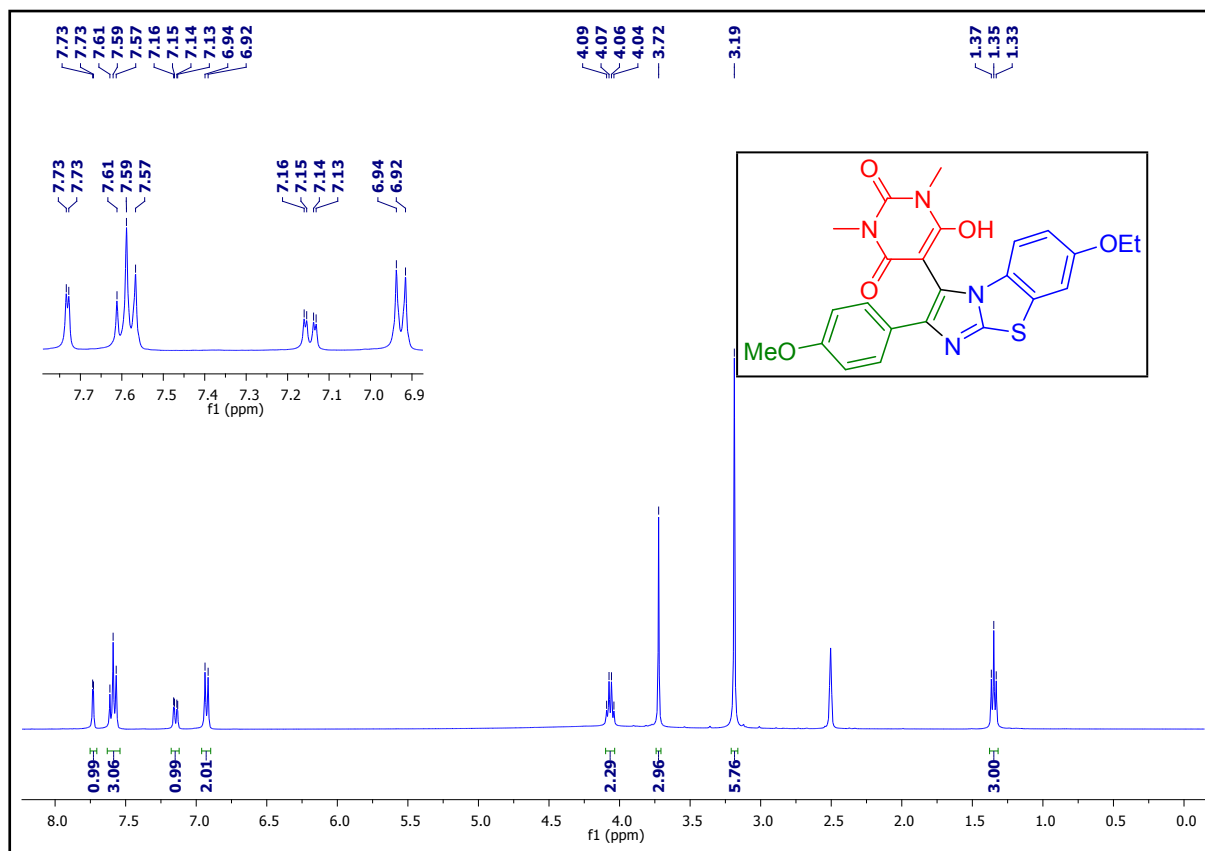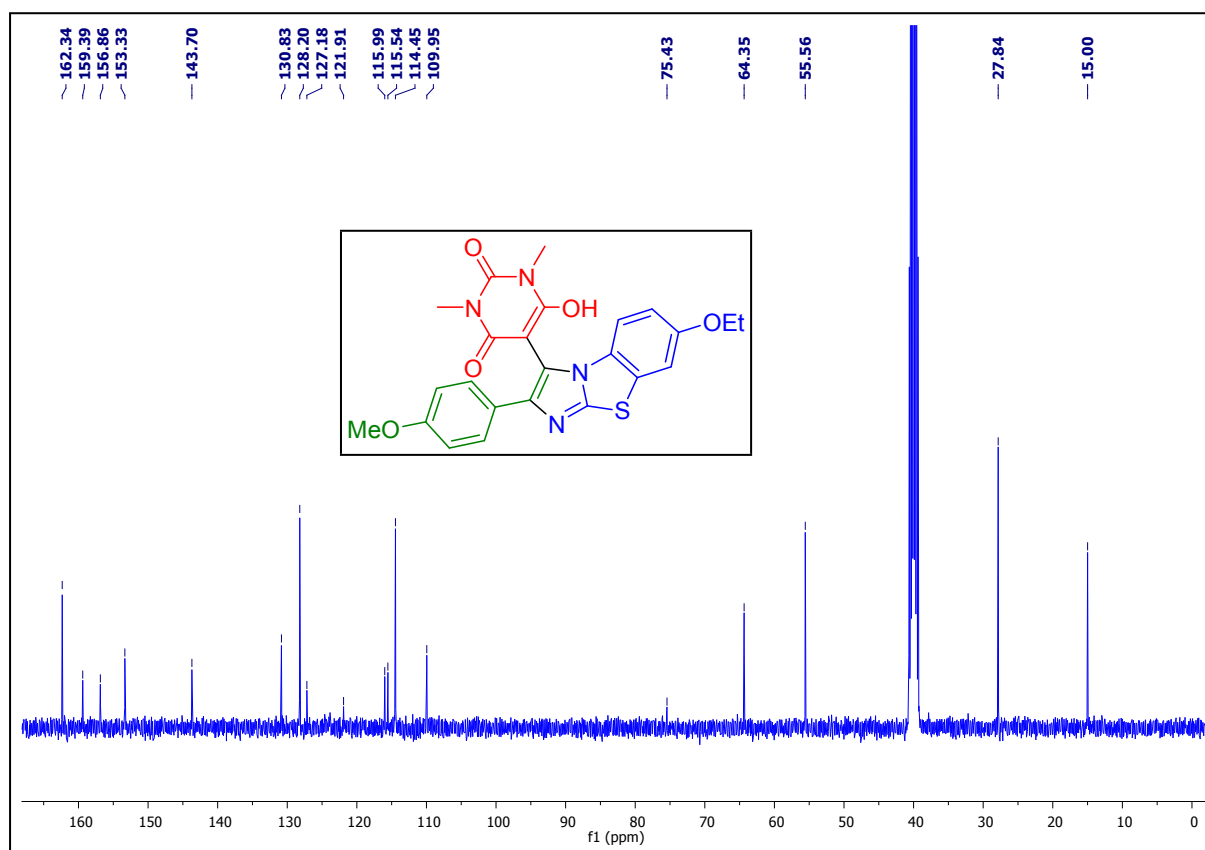

# $^1\text{H}$ and $^{13}\text{C}$ NMR spectra of 6w

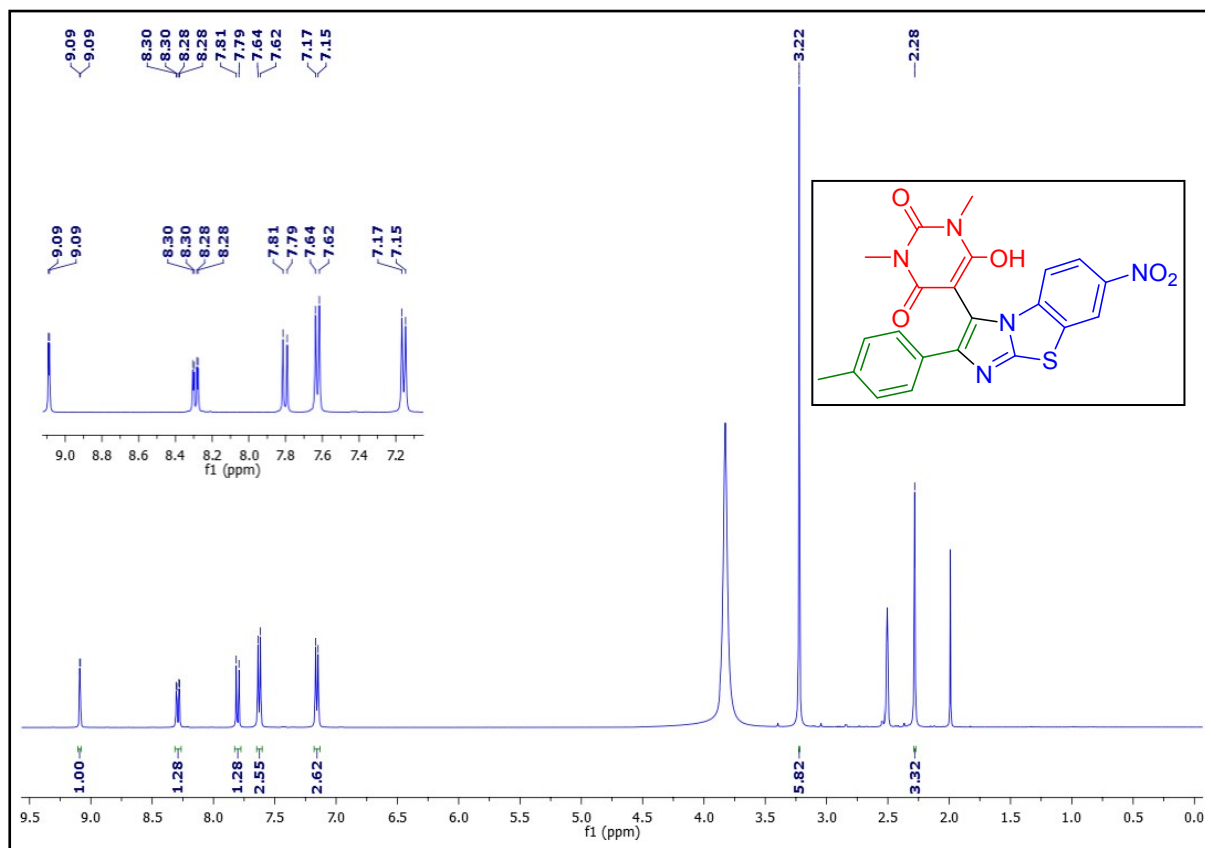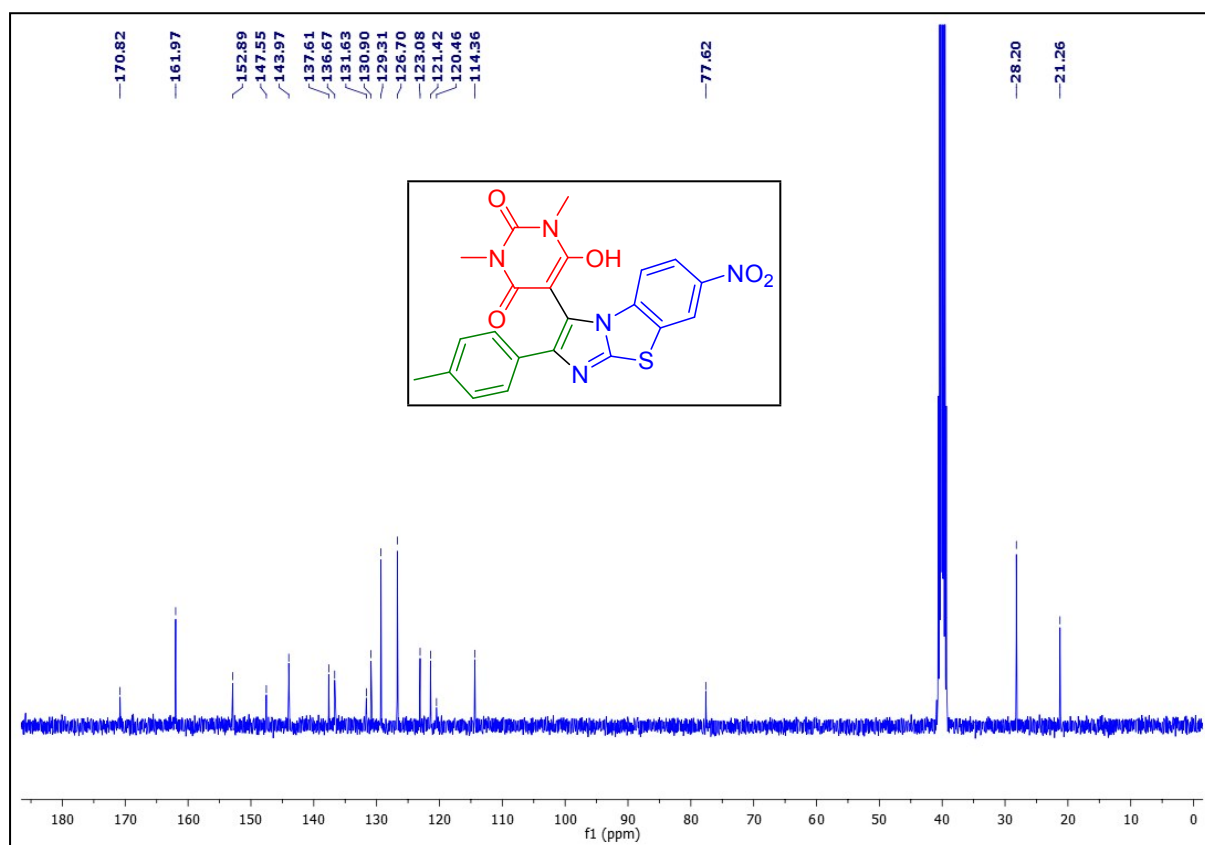

# $^1\text{H}$ and $^{13}\text{C}$ NMR spectra of 6x

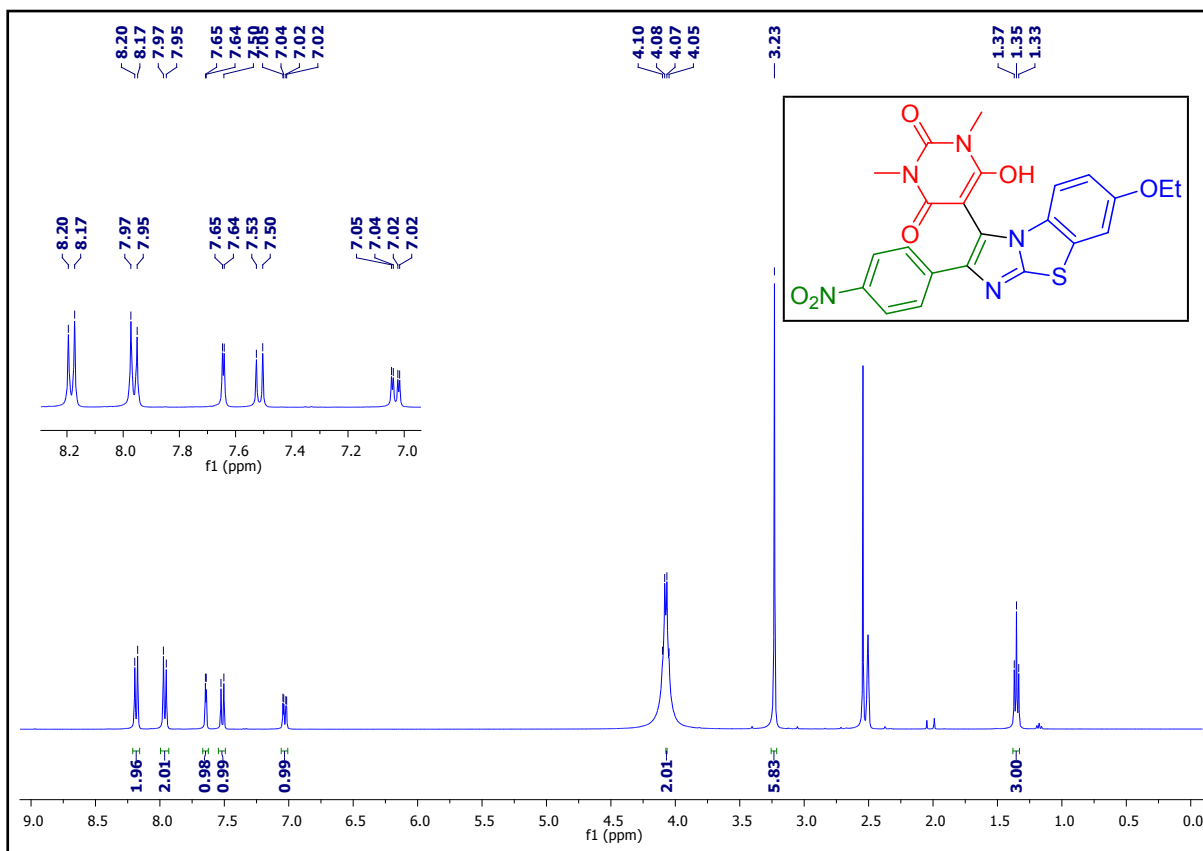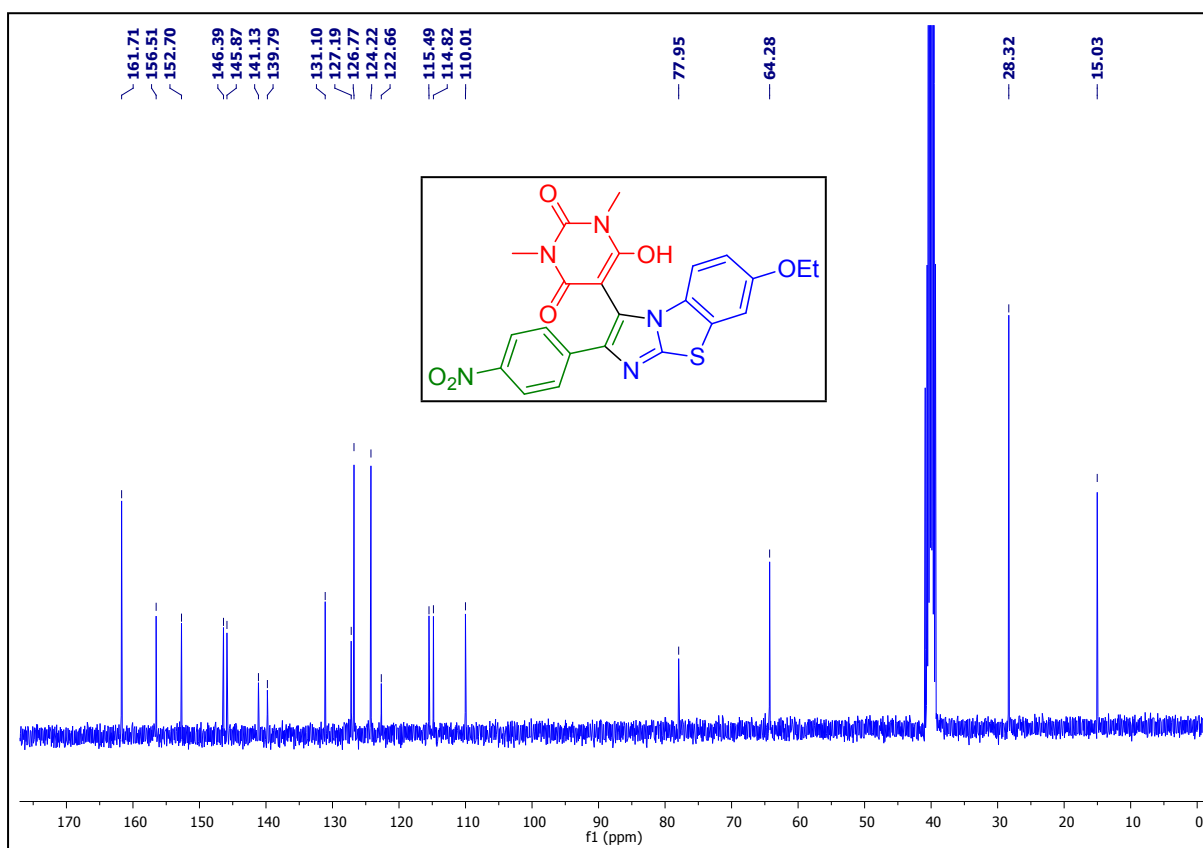

# $^1\text{H}$ and $^{13}\text{C}$ NMR spectra of 6y

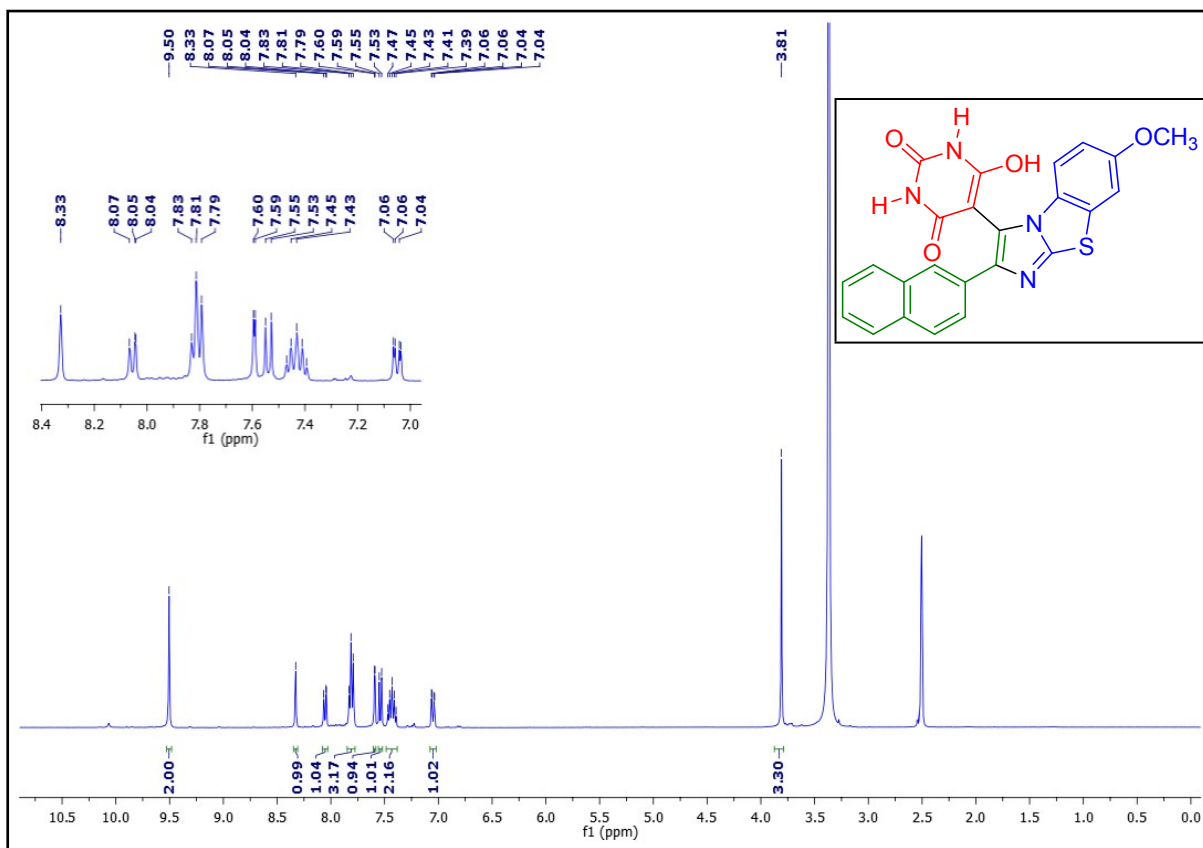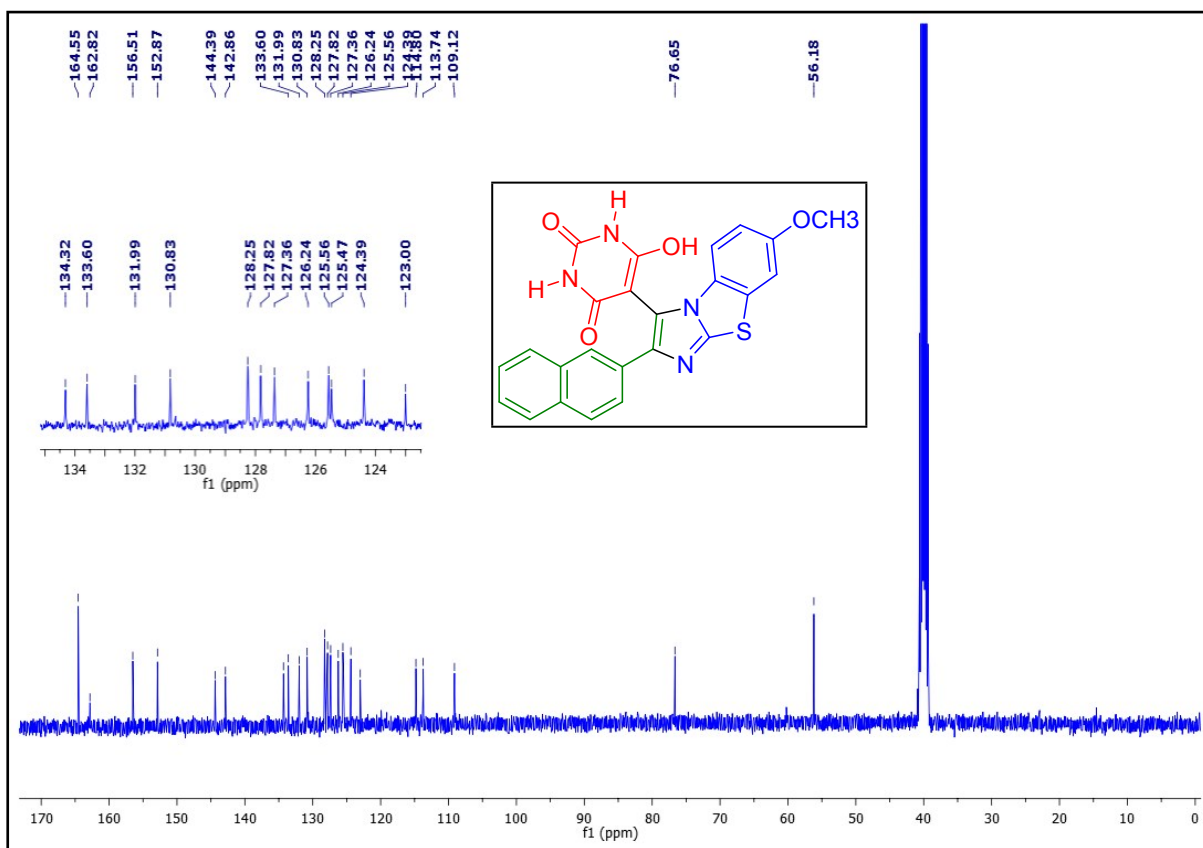

# $^1\text{H}$ and $^{13}\text{C}$ NMR spectra of 6z

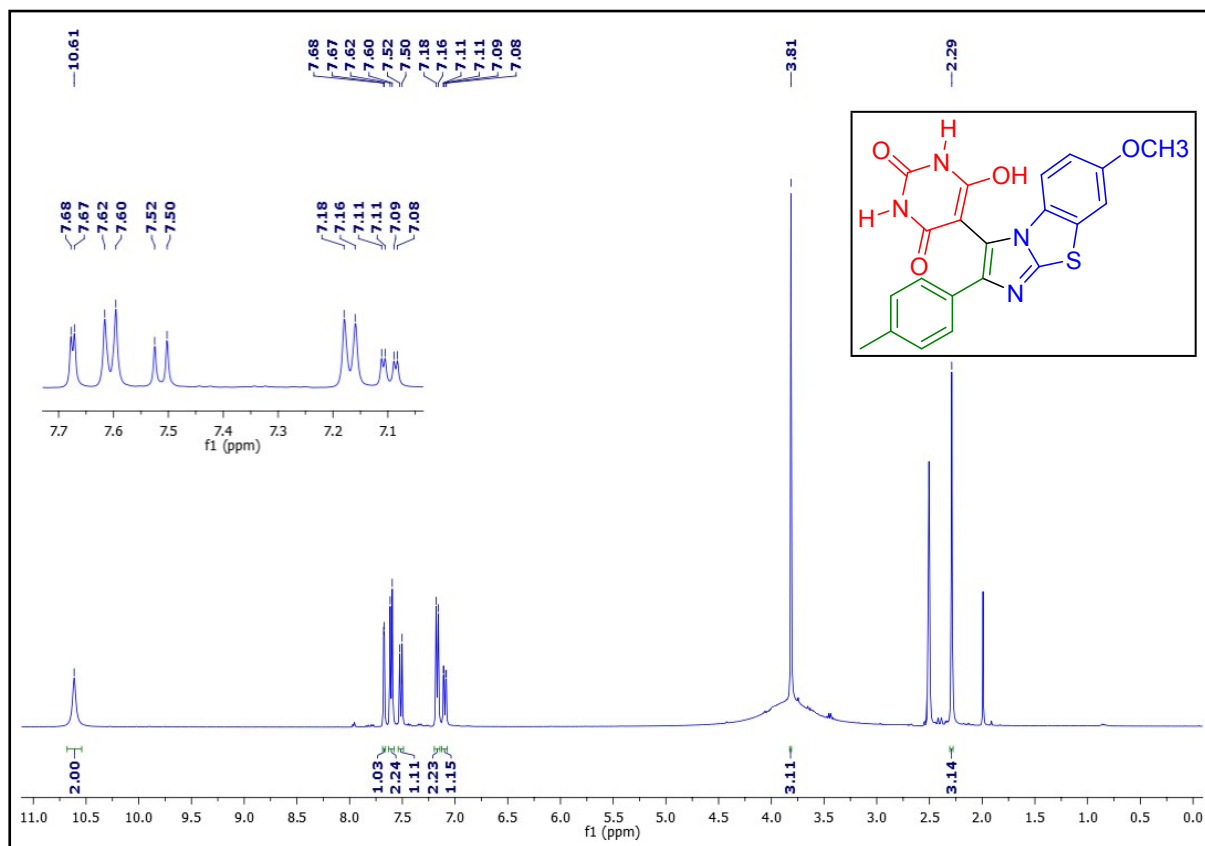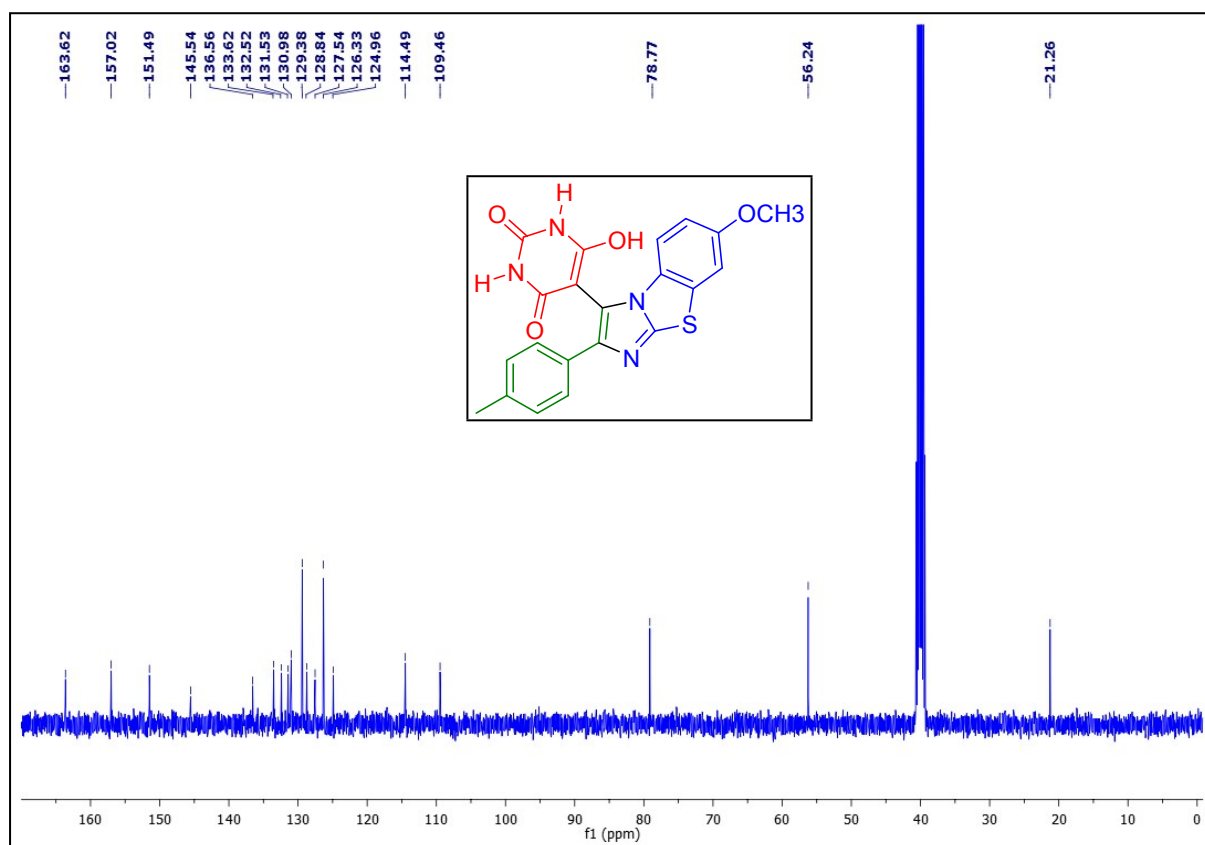

# <sup>1</sup>H and <sup>13</sup>C NMR spectra of 6a&4e (competition experiment)

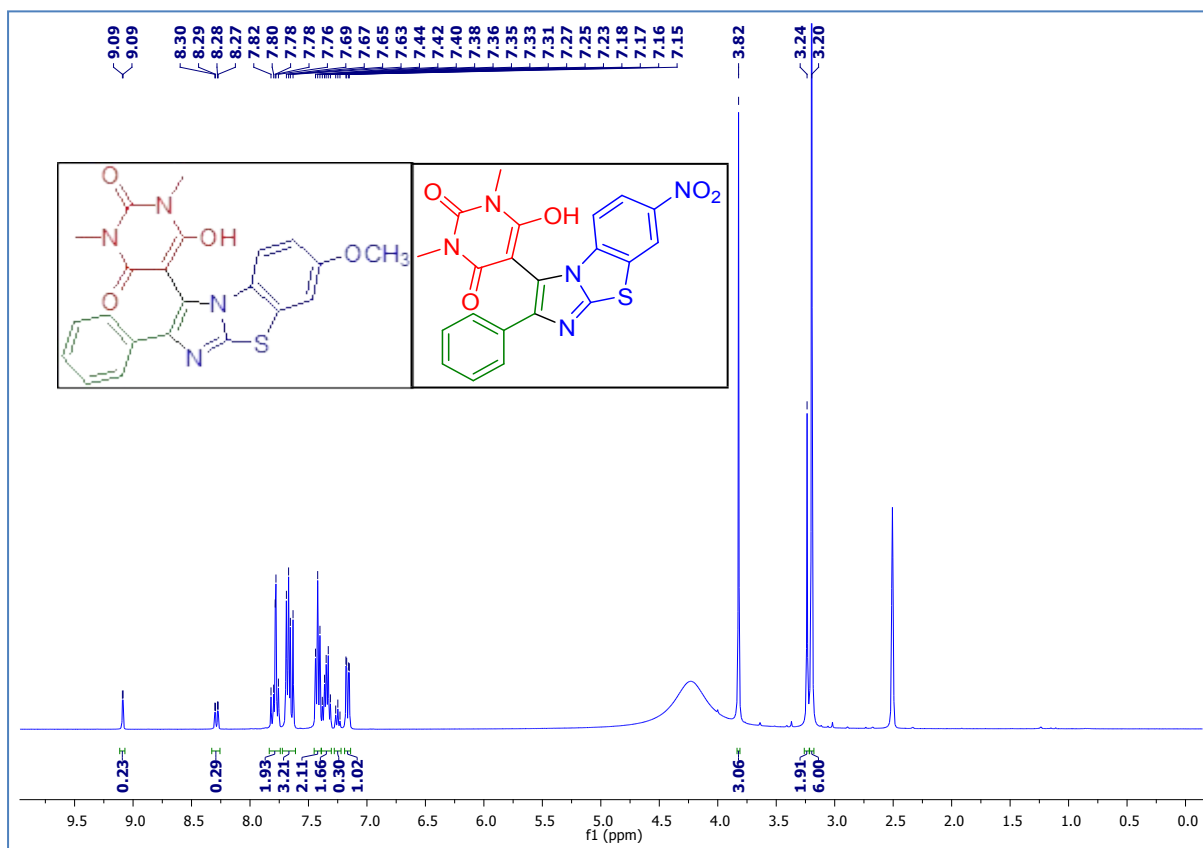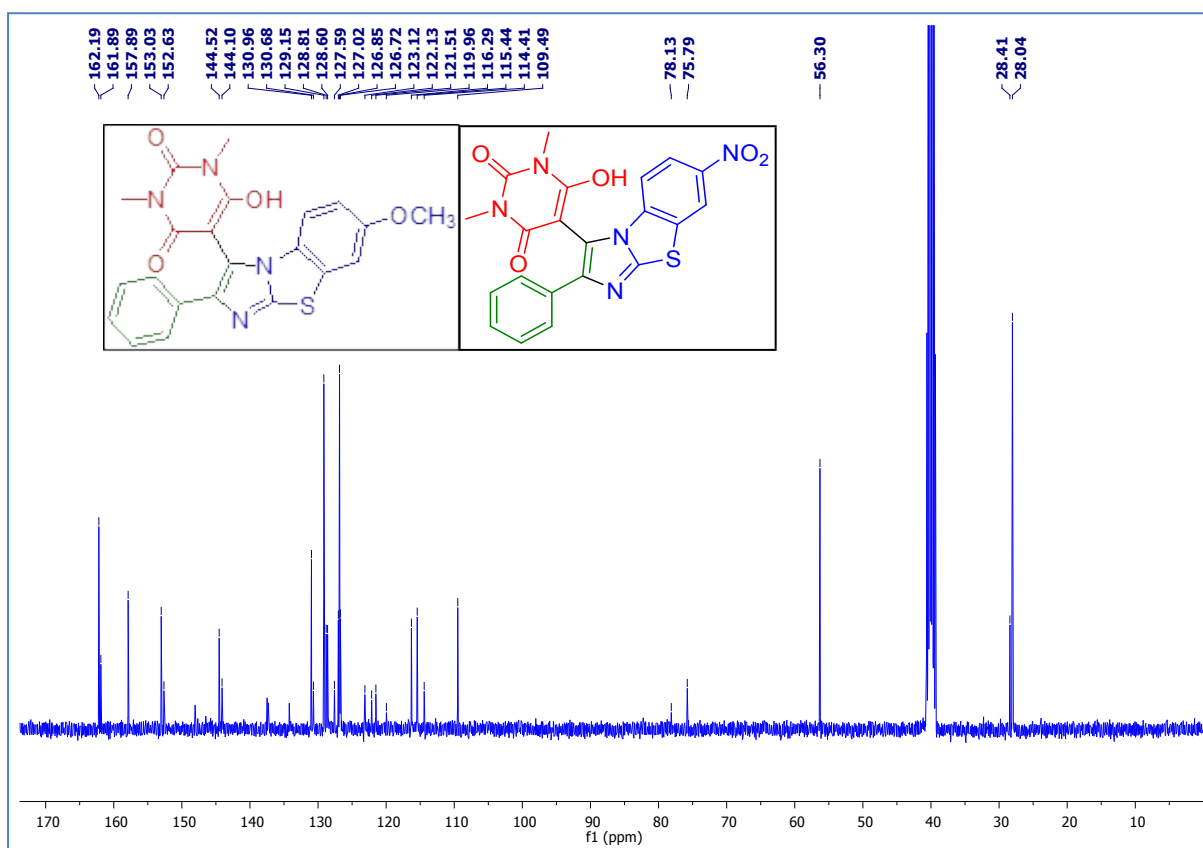

# $^1\text{H}$ and $^{13}\text{C}$ NMR spectra of 7a

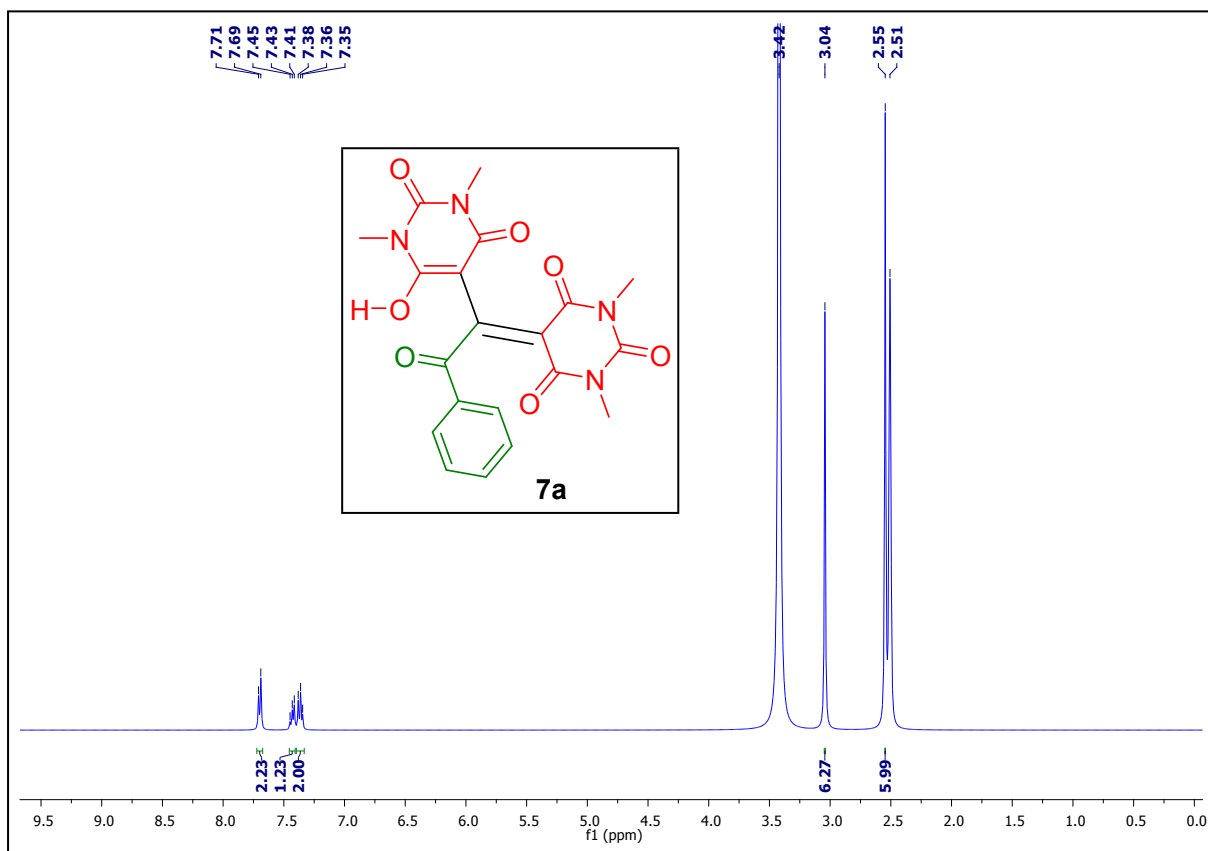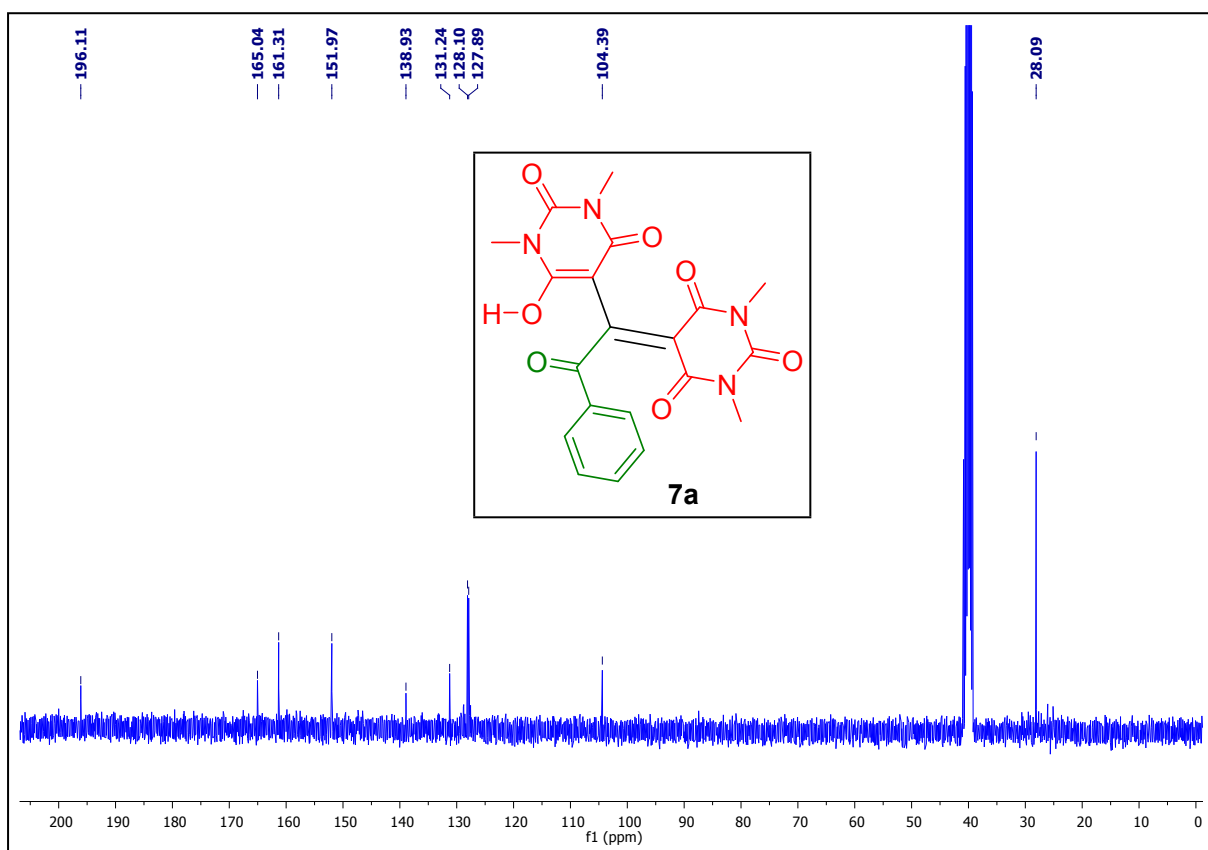

### Crystal structure description of **6o**.

A specimen of  $C_{27}H_{22}N_4O_3S$ , approximate dimensions 0.300 mm x 0.300 mm x 0.300 mm, was used for the X-ray crystallographic analysis. The X-ray intensity data were measured. The integration of the data using a monoclinic unit cell yielded a total of 35307 reflections to a maximum  $\theta$  angle of  $25.00^\circ$  ( $0.84 \text{ \AA}$  resolution), of which 4189 were independent (average redundancy 8.429, completeness = 99.9%,  $R_{\text{int}} = 7.66\%$ ,  $R_{\text{sig}} = 5.23\%$ ) and 2724 (65.03%) were greater than  $2\sigma(F^2)$ . The final cell constants of  $a = 11.638(4) \text{ \AA}$ ,  $b = 14.774(6) \text{ \AA}$ ,  $c = 14.105(5) \text{ \AA}$ ,  $\beta = 101.385(10)^\circ$ , volume =  $2377.5(15) \text{ \AA}^3$ , are based upon the refinement of the XYZ-centroids of reflections above  $20\sigma(I)$ . The calculated minimum and maximum transmission coefficients (based on crystal size) are 0.9500 and 0.9500.

The structure was solved and refined using the Bruker SHELXTL Software Package, using the space group  $P 1 21/n 1$ , with  $Z = 4$  for the formula unit,  $C_{27}H_{22}N_4O_3S$ . The final anisotropic full-matrix least-squares refinement on  $F^2$  with 322 variables converged at  $R1 = 5.42\%$ , for the observed data and  $wR2 = 14.64\%$  for all data. The goodness-of-fit was 1.053. The largest peak in the final difference electron density synthesis was  $0.470 \text{ e}^-/\text{\AA}^3$  and the largest hole was  $-0.386 \text{ e}^-/\text{\AA}^3$  with an RMS deviation of  $0.055 \text{ e}^-/\text{\AA}^3$ . On the basis of the final model, the calculated density was  $1.348 \text{ g/cm}^3$  and  $F(000)$ , 1008  $e^-$ .

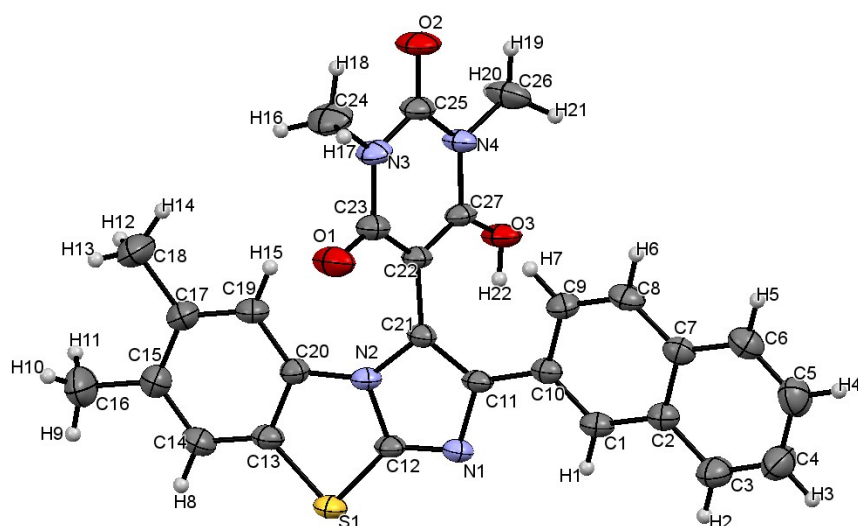

Figure S1. ORTEP view of **6o** with 50% ellipsoidal probability (CCDC 1895624).



**Table S1. Sample and crystal information for 6o.**

|                               |                                                                 |                  |
|-------------------------------|-----------------------------------------------------------------|------------------|
| <b>Chemical formula</b>       | C <sub>27</sub> H <sub>22</sub> N <sub>4</sub> O <sub>3</sub> S |                  |
| <b>Formula weight</b>         | 482.54 g/mol                                                    |                  |
| <b>Temperature</b>            | 298(2) K                                                        |                  |
| <b>Wavelength</b>             | 0.71073 Å                                                       |                  |
| <b>Crystal size</b>           | 0.300 x 0.300 x 0.300 mm                                        |                  |
| <b>Crystal system</b>         | monoclinic                                                      |                  |
| <b>Space group</b>            | P 1 21/n 1                                                      |                  |
| <b>Unit cell dimensions</b>   | a = 11.638(4) Å                                                 | α = 90°          |
|                               | b = 14.774(6) Å                                                 | β = 101.385(10)° |
|                               | c = 14.105(5) Å                                                 | γ = 90°          |
| <b>Volume</b>                 | 2377.5(15) Å <sup>3</sup>                                       |                  |
| <b>Z</b>                      | 4                                                               |                  |
| <b>Density (calculated)</b>   | 1.348 g/cm <sup>3</sup>                                         |                  |
| <b>Absorption coefficient</b> | 0.174 mm <sup>-1</sup>                                          |                  |
| <b>F(000)</b>                 | 1008                                                            |                  |

**Table S2. Data collection and structure refinement for 6o.**

|                                         |                                                                                                                                                               |
|-----------------------------------------|---------------------------------------------------------------------------------------------------------------------------------------------------------------|
| <b>Theta range for data collection</b>  | 2.53 to 25.00°                                                                                                                                                |
| <b>Index ranges</b>                     | -13<=h<=13, -17<=k<=17, -16<=l<=16                                                                                                                            |
| <b>Reflections collected</b>            | 35307                                                                                                                                                         |
| <b>Independent reflections</b>          | 4189 [R(int) = 0.0766]                                                                                                                                        |
| <b>Max. and min. transmission</b>       | 0.9500 and 0.9500                                                                                                                                             |
| <b>Structure solution technique</b>     | direct methods                                                                                                                                                |
| <b>Structure solution program</b>       | SHELXS-97 (Sheldrick 2008)                                                                                                                                    |
| <b>Refinement method</b>                | Full-matrix least-squares on F <sup>2</sup>                                                                                                                   |
| <b>Refinement program</b>               | SHELXL-2014 (Sheldrick 2014)                                                                                                                                  |
| <b>Function minimized</b>               | Σ w(F <sub>o</sub> <sup>2</sup> - F <sub>c</sub> <sup>2</sup> ) <sup>2</sup>                                                                                  |
| <b>Data / restraints / parameters</b>   | 4189 / 0 / 322                                                                                                                                                |
| <b>Goodness-of-fit on F<sup>2</sup></b> | 1.053                                                                                                                                                         |
| <b>Δ/σ<sub>max</sub></b>                | 0.010                                                                                                                                                         |
| <b>Final R indices</b>                  | 2724 data; I>2σ(I) R1 = 0.0542, wR2 = 0.1230                                                                                                                  |
|                                         | all data R1 = 0.0998, wR2 = 0.1464                                                                                                                            |
| <b>Weighting scheme</b>                 | w=1/[σ <sup>2</sup> (F <sub>o</sub> <sup>2</sup> )+(0.0613P) <sup>2</sup> +1.6611P]<br>where P=(F <sub>o</sub> <sup>2</sup> +2F <sub>c</sub> <sup>2</sup> )/3 |
| <b>Extinction coefficient</b>           | 0.0024(6)                                                                                                                                                     |
| <b>Largest diff. peak and hole</b>      | 0.470 and -0.386 eÅ <sup>-3</sup>                                                                                                                             |
| <b>R.M.S. deviation from mean</b>       | 0.055 eÅ <sup>-3</sup>                                                                                                                                        |

**Table S3. Atomic coordinates and equivalent isotropic atomic displacement parameters ( $\text{\AA}^2$ ) for 6o.**

$U(\text{eq})$  is defined as one third of the trace of the orthogonalized  $U_{ij}$  tensor.

|     | x/a         | y/b         | z/c         | U(eq)      |
|-----|-------------|-------------|-------------|------------|
| S1  | 0.79191(6)  | 0.58897(6)  | 0.67106(6)  | 0.0393(3)  |
| O3  | 0.29216(18) | 0.45779(15) | 0.60164(17) | 0.0450(6)  |
| O2  | 0.04719(18) | 0.59847(16) | 0.76763(18) | 0.0566(7)  |
| N2  | 0.57178(19) | 0.60111(16) | 0.68066(17) | 0.0304(6)  |
| O1  | 0.38399(19) | 0.74586(16) | 0.74446(18) | 0.0558(7)  |
| N1  | 0.58721(19) | 0.60245(16) | 0.52741(18) | 0.0319(6)  |
| N4  | 0.1706(2)   | 0.52982(17) | 0.68330(19) | 0.0369(7)  |
| N3  | 0.2174(2)   | 0.67091(18) | 0.75892(19) | 0.0406(7)  |
| C21 | 0.4559(2)   | 0.60759(19) | 0.6264(2)   | 0.0291(7)  |
| C11 | 0.4671(2)   | 0.61115(19) | 0.5315(2)   | 0.0302(7)  |
| C10 | 0.3813(2)   | 0.62733(19) | 0.4421(2)   | 0.0311(7)  |
| C27 | 0.2762(2)   | 0.5276(2)   | 0.6489(2)   | 0.0312(7)  |
| C20 | 0.6295(2)   | 0.5977(2)   | 0.7785(2)   | 0.0322(7)  |
| C2  | 0.3327(2)   | 0.6388(2)   | 0.2659(2)   | 0.0340(7)  |
| C12 | 0.6465(2)   | 0.5972(2)   | 0.6187(2)   | 0.0306(7)  |
| C7  | 0.2157(2)   | 0.6631(2)   | 0.2700(2)   | 0.0336(7)  |
| C22 | 0.3509(2)   | 0.6027(2)   | 0.6698(2)   | 0.0309(7)  |
| C1  | 0.4128(2)   | 0.6215(2)   | 0.3529(2)   | 0.0351(8)  |
| C13 | 0.7511(2)   | 0.5902(2)   | 0.7848(2)   | 0.0343(8)  |
| C23 | 0.3230(3)   | 0.6774(2)   | 0.7244(2)   | 0.0380(8)  |
| C9  | 0.2640(2)   | 0.6536(2)   | 0.4449(2)   | 0.0382(8)  |
| C19 | 0.5823(3)   | 0.6014(2)   | 0.8611(2)   | 0.0393(8)  |
| C8  | 0.1858(3)   | 0.6707(2)   | 0.3616(2)   | 0.0401(8)  |
| C14 | 0.8243(3)   | 0.5847(2)   | 0.8744(2)   | 0.0429(8)  |
| C6  | 0.1361(3)   | 0.6787(2)   | 0.1827(2)   | 0.0441(9)  |
| C17 | 0.6561(3)   | 0.5965(2)   | 0.9505(2)   | 0.0451(9)  |
| C15 | 0.7783(3)   | 0.5870(2)   | 0.9579(2)   | 0.0457(9)  |
| C3  | 0.3655(3)   | 0.6328(2)   | 0.1744(2)   | 0.0484(9)  |
| C5  | 0.1694(3)   | 0.6715(2)   | 0.0955(3)   | 0.0529(10) |
| C26 | 0.0866(3)   | 0.4549(2)   | 0.6580(3)   | 0.0548(10) |
| C4  | 0.2860(3)   | 0.6483(3)   | 0.0915(3)   | 0.0552(10) |
| C24 | 0.1844(3)   | 0.7471(3)   | 0.8152(3)   | 0.0616(11) |
| C16 | 0.8590(3)   | 0.5787(3)   | 0.0551(3)   | 0.0754(13) |
| C18 | 0.6052(3)   | 0.6033(3)   | 0.0407(3)   | 0.0778(14) |
| C25 | 0.1392(2)   | 0.5998(2)   | 0.7382(2)   | 0.0389(8)  |

**Table S4. Bond lengths ( $\text{\AA}$ ) for 6o.**

|        |          |        |          |
|--------|----------|--------|----------|
| S1-C12 | 1.712(3) | S1-C13 | 1.760(3) |
| O3-C27 | 1.262(3) | O3-H22 | 0.82     |
| O2-C25 | 1.223(3) | N2-C12 | 1.350(3) |

|         |          |         |          |
|---------|----------|---------|----------|
| N2-C20  | 1.412(4) | N2-C21  | 1.416(3) |
| O1-C23  | 1.237(4) | N1-C12  | 1.338(4) |
| N1-C11  | 1.417(3) | N4-C25  | 1.384(4) |
| N4-C27  | 1.407(3) | N4-C26  | 1.473(4) |
| N3-C25  | 1.382(4) | N3-C23  | 1.412(4) |
| N3-C24  | 1.471(4) | C21-C11 | 1.371(4) |
| C21-C22 | 1.473(4) | C11-C10 | 1.466(4) |
| C10-C1  | 1.380(4) | C10-C9  | 1.427(4) |
| C27-C22 | 1.405(4) | C20-C19 | 1.384(4) |
| C20-C13 | 1.405(4) | C2-C1   | 1.411(4) |
| C2-C3   | 1.418(4) | C2-C7   | 1.421(4) |
| C7-C6   | 1.406(4) | C7-C8   | 1.407(4) |
| C22-C23 | 1.418(4) | C1-H1   | 0.93     |
| C13-C14 | 1.380(4) | C9-C8   | 1.360(4) |
| C9-H7   | 0.93     | C19-C17 | 1.380(4) |
| C19-H15 | 0.93     | C8-H6   | 0.93     |
| C14-C15 | 1.387(4) | C14-H8  | 0.93     |
| C6-C5   | 1.365(5) | C6-H5   | 0.93     |
| C17-C15 | 1.413(4) | C17-C18 | 1.509(5) |
| C15-C16 | 1.507(5) | C3-C4   | 1.360(5) |
| C3-H2   | 0.93     | C5-C4   | 1.410(5) |
| C5-H4   | 0.93     | C26-H20 | 0.96     |
| C26-H21 | 0.96     | C26-H19 | 0.96     |
| C4-H3   | 0.93     | C24-H18 | 0.96     |
| C24-H17 | 0.96     | C24-H16 | 0.96     |
| C16-H9  | 0.96     | C16-H11 | 0.96     |
| C16-H10 | 0.96     | C18-H14 | 0.96     |
| C18-H13 | 0.96     | C18-H12 | 0.96     |

**Table S5. Bond angles (°) for 6o.**

|             |           |             |          |
|-------------|-----------|-------------|----------|
| C12-S1-C13  | 88.32(14) | C27-O3-H22  | 109.5    |
| C12-N2-C20  | 112.9(2)  | C12-N2-C21  | 108.6(2) |
| C20-N2-C21  | 138.6(2)  | C12-N1-C11  | 106.9(2) |
| C25-N4-C27  | 123.7(3)  | C25-N4-C26  | 117.5(2) |
| C27-N4-C26  | 118.8(3)  | C25-N3-C23  | 124.0(3) |
| C25-N3-C24  | 117.7(2)  | C23-N3-C24  | 118.2(3) |
| C11-C21-N2  | 105.5(2)  | C11-C21-C22 | 130.9(3) |
| N2-C21-C22  | 123.5(3)  | C21-C11-N1  | 108.7(2) |
| C21-C11-C10 | 131.8(2)  | N1-C11-C10  | 119.3(2) |
| C1-C10-C9   | 118.1(3)  | C1-C10-C11  | 121.0(3) |
| C9-C10-C11  | 120.9(3)  | O3-C27-C22  | 127.3(3) |

|             |          |             |          |
|-------------|----------|-------------|----------|
| O3-C27-N4   | 115.5(3) | C22-C27-N4  | 117.2(3) |
| C19-C20-C13 | 120.9(3) | C19-C20-N2  | 129.1(3) |
| C13-C20-N2  | 110.1(2) | C1-C2-C3    | 122.0(3) |
| C1-C2-C7    | 118.9(3) | C3-C2-C7    | 119.1(3) |
| N1-C12-N2   | 110.2(2) | N1-C12-S1   | 134.2(2) |
| N2-C12-S1   | 115.6(2) | C6-C7-C8    | 123.5(3) |
| C6-C7-C2    | 118.4(3) | C8-C7-C2    | 118.1(3) |
| C27-C22-C23 | 121.9(3) | C27-C22-C21 | 118.8(3) |
| C23-C22-C21 | 119.0(3) | C10-C1-C2   | 122.2(3) |
| C10-C1-H1   | 118.9    | C2-C1-H1    | 118.9    |
| C14-C13-C20 | 119.6(3) | C14-C13-S1  | 127.2(2) |
| C20-C13-S1  | 113.2(2) | O1-C23-N3   | 118.4(3) |
| O1-C23-C22  | 125.3(3) | N3-C23-C22  | 116.3(3) |
| C8-C9-C10   | 120.5(3) | C8-C9-H7    | 119.8    |
| C10-C9-H7   | 119.8    | C17-C19-C20 | 119.2(3) |
| C17-C19-H15 | 120.4    | C20-C19-H15 | 120.4    |
| C9-C8-C7    | 122.2(3) | C9-C8-H6    | 118.9    |
| C7-C8-H6    | 118.9    | C13-C14-C15 | 120.3(3) |
| C13-C14-H8  | 119.8    | C15-C14-H8  | 119.8    |
| C5-C6-C7    | 121.5(3) | C5-C6-H5    | 119.3    |
| C7-C6-H5    | 119.3    | C19-C17-C15 | 120.5(3) |
| C19-C17-C18 | 119.3(3) | C15-C17-C18 | 120.2(3) |
| C14-C15-C17 | 119.5(3) | C14-C15-C16 | 119.7(3) |
| C17-C15-C16 | 120.8(3) | C4-C3-C2    | 120.7(3) |
| C4-C3-H2    | 119.6    | C2-C3-H2    | 119.6    |
| C6-C5-C4    | 120.1(3) | C6-C5-H4    | 120.0    |
| C4-C5-H4    | 120.0    | N4-C26-H20  | 109.5    |
| N4-C26-H21  | 109.5    | H20-C26-H21 | 109.5    |
| N4-C26-H19  | 109.5    | H20-C26-H19 | 109.5    |
| H21-C26-H19 | 109.5    | C3-C4-C5    | 120.2(3) |
| C3-C4-H3    | 119.9    | C5-C4-H3    | 119.9    |
| N3-C24-H18  | 109.5    | N3-C24-H17  | 109.5    |
| H18-C24-H17 | 109.5    | N3-C24-H16  | 109.5    |
| H18-C24-H16 | 109.5    | H17-C24-H16 | 109.5    |
| C15-C16-H9  | 109.5    | C15-C16-H11 | 109.5    |
| H9-C16-H11  | 109.5    | C15-C16-H10 | 109.5    |
| H9-C16-H10  | 109.5    | H11-C16-H10 | 109.5    |
| C17-C18-H14 | 109.5    | C17-C18-H13 | 109.5    |
| H14-C18-H13 | 109.5    | C17-C18-H12 | 109.5    |
| H14-C18-H12 | 109.5    | H13-C18-H12 | 109.5    |
| O2-C25-N3   | 121.7(3) | O2-C25-N4   | 121.5(3) |
| N3-C25-N4   | 116.8(2) |             |          |

**Table S6. Torsion angles (°) for 6o.**

|                 |           |                 |           |
|-----------------|-----------|-----------------|-----------|
| C12-N2-C21-C11  | -2.5(3)   | C20-N2-C21-C11  | 177.5(3)  |
| C12-N2-C21-C22  | 172.8(3)  | C20-N2-C21-C22  | -7.2(5)   |
| N2-C21-C11-N1   | 2.8(3)    | C22-C21-C11-N1  | -172.0(3) |
| N2-C21-C11-C10  | -172.8(3) | C22-C21-C11-C10 | 12.4(6)   |
| C12-N1-C11-C21  | -2.2(3)   | C12-N1-C11-C10  | 174.1(3)  |
| C21-C11-C10-C1  | -175.5(3) | N1-C11-C10-C1   | 9.3(4)    |
| C21-C11-C10-C9  | 7.4(5)    | N1-C11-C10-C9   | -167.9(3) |
| C25-N4-C27-O3   | 178.5(3)  | C26-N4-C27-O3   | -3.0(4)   |
| C25-N4-C27-C22  | -2.0(4)   | C26-N4-C27-C22  | 176.4(3)  |
| C12-N2-C20-C19  | 178.9(3)  | C21-N2-C20-C19  | -1.1(6)   |
| C12-N2-C20-C13  | -0.5(4)   | C21-N2-C20-C13  | 179.5(3)  |
| C11-N1-C12-N2   | 0.6(3)    | C11-N1-C12-S1   | -178.0(3) |
| C20-N2-C12-N1   | -178.8(2) | C21-N2-C12-N1   | 1.2(3)    |
| C20-N2-C12-S1   | 0.1(3)    | C21-N2-C12-S1   | -179.9(2) |
| C13-S1-C12-N1   | 178.8(3)  | C13-S1-C12-N2   | 0.3(2)    |
| C1-C2-C7-C6     | -178.9(3) | C3-C2-C7-C6     | 1.1(4)    |
| C1-C2-C7-C8     | 1.3(4)    | C3-C2-C7-C8     | -178.6(3) |
| O3-C27-C22-C23  | -179.8(3) | N4-C27-C22-C23  | 0.9(4)    |
| O3-C27-C22-C21  | 5.9(5)    | N4-C27-C22-C21  | -173.5(3) |
| C11-C21-C22-C27 | 61.6(4)   | N2-C21-C22-C27  | -112.4(3) |
| C11-C21-C22-C23 | -113.0(4) | N2-C21-C22-C23  | 73.1(4)   |
| C9-C10-C1-C2    | -1.2(4)   | C11-C10-C1-C2   | -178.4(3) |
| C3-C2-C1-C10    | 179.9(3)  | C7-C2-C1-C10    | 0.0(5)    |
| C19-C20-C13-C14 | 1.3(5)    | N2-C20-C13-C14  | -179.2(3) |
| C19-C20-C13-S1  | -178.7(2) | N2-C20-C13-S1   | 0.8(3)    |
| C12-S1-C13-C14  | 179.3(3)  | C12-S1-C13-C20  | -0.6(2)   |
| C25-N3-C23-O1   | 177.2(3)  | C24-N3-C23-O1   | 1.4(5)    |
| C25-N3-C23-C22  | -3.7(4)   | C24-N3-C23-C22  | -179.5(3) |
| C27-C22-C23-O1  | -179.2(3) | C21-C22-C23-O1  | -4.8(5)   |
| C27-C22-C23-N3  | 1.8(4)    | C21-C22-C23-N3  | 176.1(3)  |
| C1-C10-C9-C8    | 1.2(4)    | C11-C10-C9-C8   | 178.4(3)  |
| C13-C20-C19-C17 | -0.9(5)   | N2-C20-C19-C17  | 179.8(3)  |
| C10-C9-C8-C7    | 0.2(5)    | C6-C7-C8-C9     | 178.8(3)  |
| C2-C7-C8-C9     | -1.4(5)   | C20-C13-C14-C15 | -0.3(5)   |
| S1-C13-C14-C15  | 179.7(3)  | C8-C7-C6-C5     | 179.3(3)  |
| C2-C7-C6-C5     | -0.4(5)   | C20-C19-C17-C15 | -0.5(5)   |
| C20-C19-C17-C18 | 178.2(3)  | C13-C14-C15-C17 | -1.0(5)   |
| C13-C14-C15-C16 | 178.6(3)  | C19-C17-C15-C14 | 1.5(5)    |
| C18-C17-C15-C14 | -177.3(3) | C19-C17-C15-C16 | -178.1(3) |
| C18-C17-C15-C16 | 3.1(6)    | C1-C2-C3-C4     | 178.8(3)  |
| C7-C2-C3-C4     | -1.2(5)   | C7-C6-C5-C4     | -0.3(5)   |
| C2-C3-C4-C5     | 0.5(6)    | C6-C5-C4-C3     | 0.2(6)    |
| C23-N3-C25-O2   | -177.9(3) | C24-N3-C25-O2   | -2.0(5)   |
| C23-N3-C25-N4   | 2.7(4)    | C24-N3-C25-N4   | 178.5(3)  |
| C27-N4-C25-O2   | -179.1(3) | C26-N4-C25-O2   | 2.4(5)    |

C27-N4-C25-N3

0.4(4)

C26-N4-C25-N3

-178.1(3)

**Table S7. Anisotropic atomic displacement parameters (Å<sup>2</sup>) for 6o.**

The anisotropic atomic displacement factor exponent takes the form:  $-2\pi^2 [ h^2 a^{*2} U_{11} + \dots + 2 h k a^* b^* U_{12} ]$

|     | U <sub>11</sub> | U <sub>22</sub> | U <sub>33</sub> | U <sub>23</sub> | U <sub>13</sub> | U <sub>12</sub> |
|-----|-----------------|-----------------|-----------------|-----------------|-----------------|-----------------|
| S1  | 0.0221(4)       | 0.0568(6)       | 0.0418(5)       | -0.0005(4)      | 0.0130(3)       | 0.0020(4)       |
| O3  | 0.0342(13)      | 0.0469(14)      | 0.0619(16)      | -0.0080(12)     | 0.0290(12)      | -0.0039(11)     |
| O2  | 0.0341(13)      | 0.0697(17)      | 0.0757(18)      | -0.0060(14)     | 0.0343(13)      | 0.0010(12)      |
| N2  | 0.0224(12)      | 0.0376(15)      | 0.0339(15)      | -0.0015(12)     | 0.0119(11)      | 0.0003(11)      |
| O1  | 0.0456(14)      | 0.0513(15)      | 0.0784(18)      | -0.0237(13)     | 0.0311(13)      | -0.0135(12)     |
| N1  | 0.0212(12)      | 0.0394(15)      | 0.0370(16)      | -0.0012(12)     | 0.0103(11)      | -0.0013(11)     |
| N4  | 0.0249(13)      | 0.0416(16)      | 0.0488(17)      | -0.0017(13)     | 0.0183(12)      | -0.0020(12)     |
| N3  | 0.0318(14)      | 0.0461(17)      | 0.0499(17)      | -0.0103(14)     | 0.0226(13)      | 0.0019(13)      |
| C21 | 0.0213(14)      | 0.0330(18)      | 0.0348(18)      | -0.0041(13)     | 0.0099(13)      | -0.0013(12)     |
| C11 | 0.0214(14)      | 0.0335(19)      | 0.0388(19)      | -0.0039(14)     | 0.0134(13)      | -0.0026(12)     |
| C10 | 0.0260(15)      | 0.0305(17)      | 0.0390(19)      | -0.0025(14)     | 0.0116(14)      | -0.0014(13)     |
| C27 | 0.0246(15)      | 0.0386(19)      | 0.0343(18)      | 0.0015(15)      | 0.0150(13)      | 0.0035(14)      |
| C20 | 0.0279(15)      | 0.0365(18)      | 0.0343(18)      | -0.0049(14)     | 0.0114(14)      | -0.0015(14)     |
| C2  | 0.0305(16)      | 0.0356(18)      | 0.0373(19)      | 0.0002(15)      | 0.0102(15)      | 0.0004(14)      |
| C12 | 0.0224(15)      | 0.0355(18)      | 0.0374(19)      | -0.0035(14)     | 0.0142(14)      | 0.0010(13)      |
| C7  | 0.0303(16)      | 0.0305(18)      | 0.0407(19)      | 0.0015(15)      | 0.0085(15)      | -0.0015(13)     |
| C22 | 0.0218(15)      | 0.0379(19)      | 0.0359(18)      | -0.0032(14)     | 0.0129(13)      | -0.0009(13)     |
| C1  | 0.0260(16)      | 0.0391(19)      | 0.043(2)        | 0.0009(15)      | 0.0133(15)      | 0.0014(14)      |
| C13 | 0.0243(15)      | 0.0405(19)      | 0.041(2)        | -0.0008(15)     | 0.0122(14)      | 0.0010(14)      |
| C23 | 0.0283(16)      | 0.046(2)        | 0.043(2)        | -0.0010(16)     | 0.0144(15)      | -0.0009(15)     |
| C9  | 0.0312(17)      | 0.046(2)        | 0.040(2)        | -0.0040(16)     | 0.0150(15)      | 0.0027(15)      |
| C19 | 0.0274(16)      | 0.053(2)        | 0.041(2)        | -0.0033(16)     | 0.0143(15)      | -0.0007(15)     |
| C8  | 0.0249(16)      | 0.045(2)        | 0.053(2)        | -0.0008(17)     | 0.0126(16)      | 0.0045(14)      |
| C14 | 0.0267(16)      | 0.056(2)        | 0.047(2)        | -0.0012(17)     | 0.0080(16)      | 0.0006(15)      |
| C6  | 0.0331(18)      | 0.046(2)        | 0.052(2)        | 0.0023(17)      | 0.0056(17)      | 0.0017(15)      |
| C17 | 0.0381(18)      | 0.064(2)        | 0.036(2)        | -0.0040(17)     | 0.0136(16)      | -0.0034(17)     |
| C15 | 0.0397(19)      | 0.061(2)        | 0.036(2)        | -0.0037(17)     | 0.0075(16)      | -0.0027(17)     |
| C3  | 0.0388(19)      | 0.063(2)        | 0.046(2)        | 0.0011(18)      | 0.0147(18)      | 0.0065(17)      |
| C5  | 0.048(2)        | 0.061(2)        | 0.046(2)        | 0.0046(19)      | -0.0010(18)     | 0.0004(18)      |
| C26 | 0.0359(19)      | 0.051(2)        | 0.083(3)        | -0.004(2)       | 0.0257(19)      | -0.0113(17)     |
| C4  | 0.051(2)        | 0.076(3)        | 0.040(2)        | 0.0017(19)      | 0.0124(18)      | 0.009(2)        |
| C24 | 0.059(2)        | 0.058(2)        | 0.079(3)        | -0.022(2)       | 0.040(2)        | 0.003(2)        |
| C16 | 0.049(2)        | 0.128(4)        | 0.045(2)        | -0.006(2)       | -0.0012(19)     | 0.000(2)        |
| C18 | 0.055(2)        | 0.139(4)        | 0.045(2)        | -0.007(3)       | 0.023(2)        | -0.002(3)       |
| C25 | 0.0234(16)      | 0.052(2)        | 0.044(2)        | 0.0033(17)      | 0.0154(15)      | 0.0054(15)      |

**Table S8. Hydrogen atomic coordinates and isotropic atomic displacement**

**parameters ( $\text{\AA}^2$ ) for 6o.**

|     | <b>x/a</b> | <b>y/b</b> | <b>z/c</b> | <b>U(eq)</b> |
|-----|------------|------------|------------|--------------|
| H22 | 0.3548     | 0.4620     | 0.5837     | 0.067        |
| H1  | 0.4894     | 0.6055     | 0.3502     | 0.042        |
| H7  | 0.2410     | 0.6592     | 0.5041     | 0.046        |
| H15 | 0.5018     | 0.6072     | 0.8565     | 0.047        |
| H6  | 0.1099     | 0.6879     | 0.3653     | 0.048        |
| H8  | 0.9048     | 0.5794     | 0.8788     | 0.051        |
| H5  | 0.0592     | 0.6943     | 0.1844     | 0.053        |
| H2  | 0.4423     | 0.6180     | 0.1711     | 0.058        |
| H4  | 0.1152     | 0.6819     | 0.0386     | 0.063        |
| H20 | 0.1157     | 0.4021     | 0.6948     | 0.082        |
| H21 | 0.0770     | 0.4418     | 0.5903     | 0.082        |
| H19 | 0.0124     | 0.4719     | 0.6726     | 0.082        |
| H3  | 0.3085     | 0.6437     | 0.0320     | 0.066        |
| H18 | 0.1106     | 0.7344     | 0.8330     | 0.092        |
| H17 | 0.1778     | 0.8012     | 0.7768     | 0.092        |
| H16 | 0.2434     | 0.7554     | 0.8726     | 0.092        |
| H9  | 0.9377     | 0.5688     | 1.0463     | 0.113        |
| H11 | 0.8347     | 0.5286     | 1.0898     | 0.113        |
| H10 | 0.8560     | 0.6334     | 1.0912     | 0.113        |
| H14 | 0.5217     | 0.6102     | 1.0230     | 0.117        |
| H13 | 0.6382     | 0.6548     | 1.0780     | 0.117        |
| H12 | 0.6233     | 0.5493     | 1.0785     | 0.117        |
